# Supplementary material for: Cenozoic collapse of the eastern Uinta Mountains and drainage evolution of the Uinta Mountains region
Source: Oxford University Press journal article supplement (doi:10.1130/ges01523.1), 2017-11-22
Supplement: ges01523_suppitem2.xlsx [file ges01523_suppitem2.xlsx]

## Sheet: Sheet1
Data Repository 2. Summary of Bishop Conglomerate and Browns Park Fm. detrital zircon U-Pb data.
BISHOP CONGLOMERATE SAMPLES
GRAT, GRAT-827113-3. U-Pb geochronologic analyses.
							Isotope ratios						Apparent ages (Ma)
Analysis	U	206Pb	U/Th	206Pb*	±	207Pb*	±	206Pb*	±	error	206Pb*	±	207Pb*	±	206Pb*	±	Best age	±
	(ppm)	204Pb		207Pb*	(%)	235U*	(%)	238U	(%)	corr.	238U*	(Ma)	235U	(Ma)	207Pb*	(Ma)	(Ma)	(Ma)
GRAT-38	147.067	3611.1	0.686463	15.6445	44.7955	0.0423382	48.7233	0.00480388	19.1658	0.393359	30.8936	5.90684	42.1044	20.0977	738.978	997.363	30.8936	5.90684
GRAT-48	79.6099	1923.15	0.815757	9.26775	241.82	0.0768983	243.124	0.0051688	25.1504	0.103447	33.2344	8.33707	75.2246	178.082	1764.26	502.587	33.2344	8.33707
GRAT-85	122.262	4316.29	1.02646	16.1563	85.4608	0.0450442	86.3554	0.00527814	12.3978	0.143567	33.9356	4.1962	44.737	37.8116	670.508	2422.68	33.9356	4.1962
GRAT-10	246.638	420.038	0.499106	12.9012	37.6712	0.0565957	38.3177	0.00529555	7.00902	0.182919	34.0472	2.38009	55.899	20.8432	1134.38	777.686	34.0472	2.38009
GRAT-11	105.451	3003.36	0.903738	-4.01194	706.049	-0.182344	706.188	0.00530572	14.0008	0.0198259	34.1125	4.76341	-204.41	NA	NA	NA	34.1125	4.76341
GRAT-22	104.019	1954.76	0.938856	16.771	62.1841	0.0440219	64.2082	0.00535461	15.9945	0.249104	34.4259	5.49158	43.7432	27.497	590.048	1502.3	34.4259	5.49158
GRAT-40	154.685	3406.65	1.01707	16.8691	41.1336	0.0438728	41.6055	0.00536767	6.2491	0.150199	34.5097	2.15078	43.5981	17.7571	577.405	931.712	34.5097	2.15078
GRAT-63	157.27	3992.27	1.12084	11.7479	75.8034	0.0633179	76.2679	0.00539493	8.40513	0.110205	34.6845	2.90745	62.3386	46.146	1318.29	1797.5	34.6845	2.90745
GRAT-25	137.128	3147.12	0.909583	17.4894	57.0092	0.0425969	57.643	0.00540322	8.5246	0.147886	34.7376	2.95328	42.3563	23.9177	498.362	1368.72	34.7376	2.95328
GRAT-84	144.193	3290.92	0.894593	17.9868	46.3285	0.0415443	47.141	0.00541957	8.71438	0.184858	34.8425	3.02812	41.3307	19.0947	436.258	1087.47	34.8425	3.02812
GRAT-90	88.4513	2377.25	0.716621	6.89795	259.139	0.108654	259.333	0.00543583	10.0409	0.038718	34.9467	3.49946	104.734	263.854	2287.42	163.729	34.9467	3.49946
GRAT-47	185.723	3579.64	0.472655	18.9354	50.4278	0.0396888	50.9172	0.00545056	7.04234	0.13831	35.0411	2.46102	39.5202	19.7385	320.715	1220.52	35.0411	2.46102
GRAT-13	173.281	2685.93	1.63587	20.0384	56.4748	0.0379343	56.9831	0.00551307	7.59396	0.133267	35.442	2.68406	37.8052	21.1495	190.554	1424.62	35.442	2.68406
GRAT-14	123.003	3488.34	0.868035	30.862	82.1293	0.024864	83.1221	0.00556537	12.8086	0.154093	35.7772	4.56986	24.9377	20.4791	-928.294	2925.58	35.7772	4.56986
GRAT-37	624.283	11733.7	0.358511	21.4363	12.9949	0.0361193	13.2791	0.0056155	2.73296	0.205809	36.0986	0.983803	36.0281	4.70037	31.31	312.482	36.0986	0.983803
GRAT-62	194.691	5485.59	1.56749	30.0064	116.848	0.0258286	117.224	0.005621	9.38828	0.0800882	36.1339	3.38286	25.893	29.9779	-846.981	0	36.1339	3.38286
GRAT-46	134.991	2332.84	0.78468	29.9809	67.8673	0.0259026	69.0317	0.00563231	12.6254	0.182893	36.2063	4.55838	25.9662	17.6994	-844.551	2178.78	36.2063	4.55838
GRAT-19	258.517	4248.57	1.2989	37.9884	47.657	0.0204699	47.9893	0.00563982	5.63757	0.117476	36.2544	2.03813	20.5749	9.77469	NA	NA	36.2544	2.03813
GRAT-16	110.877	1648.58	0.793176	21.7228	51.5908	0.0358159	54.1304	0.00564274	16.3856	0.302706	36.2732	5.92688	35.7308	19.0071	-0.542179	1325.77	36.2732	5.92688
GRAT-53	240.474	6629.48	1.44087	33.2395	53.9868	0.0234199	54.2453	0.00564596	5.28871	0.0974963	36.2938	1.91408	23.506	12.6051	NA	NA	36.2938	1.91408
GRAT-66	95.1275	2499.54	1.00459	7.27122	148.599	0.10719	149.187	0.00565278	13.2379	0.0887335	36.3376	4.7968	103.392	147.687	2196.3	212.608	36.3376	4.7968
GRAT-72	130.054	3062.2	0.825341	20.3167	61.9323	0.0383803	62.8721	0.00565535	10.8297	0.17225	36.354	3.92595	38.2415	23.6003	158.361	1603.61	36.354	3.92595
GRAT-99	340.775	2615.48	2.63072	18.8904	19.0623	0.0416145	19.3864	0.00570144	3.52978	0.182076	36.6495	1.28998	41.3991	7.86452	326.085	436.199	36.6495	1.28998
GRAT-86	218.256	4924.93	1.42947	26.8017	73.4518	0.0293417	73.7811	0.00570357	6.96387	0.0943855	36.6631	2.54593	29.3644	21.3582	-534.014	2280.91	36.6631	2.54593
GRAT-97	239.902	3141.03	2.74572	18.9827	30.2861	0.0414681	31.2001	0.00570916	7.49666	0.240276	36.6989	2.74338	41.2564	12.6147	315.025	703.361	36.6989	2.74338
GRAT-28	114.262	2603.15	1.02375	20.3473	35.2259	0.0389317	39.4156	0.00574524	17.6841	0.448656	36.9302	6.51208	38.7805	14.9984	154.855	848.334	36.9302	6.51208
GRAT-74	136.771	965.938	0.781691	20.6993	53.8652	0.0383382	55.4733	0.00575555	13.2599	0.239033	36.9963	4.89163	38.2003	20.8002	114.511	1365.21	36.9963	4.89163
GRAT-41	134.768	2087.6	0.963951	7.48614	352.054	0.106099	352.191	0.0057606	9.80923	0.027852	37.0287	3.62182	102.391	357.048	2145.55	602.799	37.0287	3.62182
GRAT-87	172.101	3470.36	0.670528	26.181	41.0055	0.0304167	42.2994	0.0057756	10.3822	0.245445	37.1248	3.84329	30.4242	12.679	-471.594	1125.23	37.1248	3.84329
GRAT-79	73.0542	1730.42	0.955699	15.7119	142.227	0.0507177	142.995	0.00577946	14.8078	0.103554	37.1495	5.4852	50.2345	70.1967	729.909	793.271	37.1495	5.4852
GRAT-64	251.598	6244.7	4.37678	22.4086	26.1469	0.0359376	26.8833	0.00584066	6.24914	0.232454	37.5418	2.33922	35.85	9.46978	-76.0193	648.898	37.5418	2.33922
GRAT-61	234.66	6752.49	4.80881	22.979	27.8745	0.0351926	28.4363	0.0058652	5.62414	0.197781	37.699	2.11406	35.1196	9.81627	-137.868	701.484	37.699	2.11406
GRAT-49	90.6279	2870.02	0.58805	3.34996	557.84	0.242661	557.956	0.00589573	11.3912	0.0204159	37.8947	4.30398	220.597	NA	3462.5	17.6601	37.8947	4.30398
GRAT-82	113.79	1612.49	1.85025	32.7305	64.8362	0.0248737	66.9817	0.00590461	16.8171	0.25107	37.9516	6.36363	24.9473	16.508	-1103.15	2171.24	37.9516	6.36363
GRAT-8	168.021	5811.96	1.50728	13.638	137.177	0.0614441	137.442	0.00607757	8.53827	0.0621227	39.06	3.32496	60.5477	80.9565	1022.91	533.733	39.06	3.32496
GRAT-23	113.693	2265.12	1.02934	7.22712	169.24	0.116253	169.818	0.00609354	13.9987	0.0824332	39.1623	5.46558	111.67	181.488	2206.86	129.212	39.1623	5.46558
GRAT-67	346.716	5534.08	0.727504	33.1515	58.8064	0.0253701	58.8788	0.00609991	2.91888	0.0495744	39.2031	1.14082	25.439	14.7931	NA	NA	39.2031	1.14082
GRAT-15	78.2953	1933.01	0.692852	17.4957	169.173	0.048785	169.716	0.00619038	13.5651	0.079928	39.7828	5.37995	48.3651	80.3264	497.594	1190.47	39.7828	5.37995
GRAT-35	187.3	6189.47	0.536364	26.8483	39.6563	0.0323344	40.4573	0.00629622	8.01053	0.198	40.4608	3.23098	32.3122	12.8675	-538.67	1100.42	40.4608	3.23098
GRAT-95	223.171	5219	0.810761	17.6722	32.5594	0.0491307	33.1287	0.00629712	6.11527	0.184591	40.4666	2.46689	48.6997	15.7541	475.436	738.063	40.4666	2.46689
GRAT-98	281.501	3905.48	0.77307	22.0461	27.2882	0.0430933	27.6201	0.00689034	4.26893	0.154559	44.2656	1.8832	42.8396	11.5867	-36.2859	673.048	44.2656	1.8832
GRAT-68	281.732	13619	1.14857	22.0391	24.9791	0.0433201	25.3848	0.00692441	4.52034	0.178073	44.4838	2.0039	43.0604	10.7027	-35.5151	614.345	44.4838	2.0039
GRAT-24	155.121	9986.85	2.79905	13.1901	10.3341	0.182448	11.0341	0.0174536	3.86763	0.350515	111.543	4.27695	170.165	17.2889	1090.19	207.569	111.543	4.27695
GRAT-36	190.612	29708.9	4.19109	14.0827	5.96845	0.196281	8.96826	0.0200477	6.69382	0.74639	127.957	8.48081	181.975	14.9422	957.651	122.108	127.957	8.48081
GRAT-6	445.013	46870	1.02336	19.7638	3.28423	0.170474	3.7274	0.0244359	1.76276	0.47292	155.63	2.71054	159.831	5.51235	222.543	75.9734	155.63	2.71054
GRAT-5	228.527	27283.4	1.49102	20.092	5.94355	0.167977	6.15024	0.0244778	1.58105	0.257071	155.894	2.4352	157.662	8.98152	184.292	138.52	155.894	2.4352
GRAT-9	824.659	99261.6	0.947478	20.0598	2.27247	0.169279	2.49991	0.0246281	1.04183	0.416746	156.839	1.61427	158.793	3.67486	188.024	52.8959	156.839	1.61427
GRAT-18	602.814	69365.4	1.22571	20.264	3.04144	0.168367	3.35436	0.0247446	1.4147	0.421749	157.572	2.20215	158.001	4.90818	164.407	71.0948	157.572	2.20215
GRAT-70	254.348	28664.1	1.0142	19.6224	7.56944	0.173906	8.31538	0.0247494	3.44226	0.413963	157.603	5.35932	162.803	12.5088	239.093	174.733	157.603	5.35932
GRAT-75	623.942	41210.5	1.76785	19.9721	3.64142	0.171711	5.30954	0.0248726	3.8641	0.727766	158.378	6.04531	160.903	7.90085	198.235	84.6253	158.378	6.04531
GRAT-26	257.749	24847.8	1.43581	19.7668	7.36706	0.173808	7.49285	0.0249176	1.36721	0.182469	158.66	2.14274	162.719	11.266	222.211	170.592	158.66	2.14274
GRAT-27	332.791	28127.4	1.15253	20.2254	6.44003	0.171036	6.62077	0.0250889	1.53643	0.232063	159.738	2.42411	160.317	9.81903	168.865	150.565	159.738	2.42411
GRAT-33	411.369	34488	1.09332	20.3582	3.99284	0.170265	4.86996	0.0251399	2.78815	0.57252	160.059	4.40772	159.649	7.19455	153.591	93.5606	160.059	4.40772
GRAT-73	599.738	37697.3	1.12854	20.3312	3.06078	0.170609	3.45784	0.0251573	1.6088	0.465263	160.168	2.54504	159.948	5.11716	156.68	71.6377	160.168	2.54504
GRAT-57	247.777	19953.8	1.32941	20.6832	6.8493	0.167972	7.07588	0.0251973	1.77628	0.251033	160.419	2.81434	157.657	10.3331	116.348	161.688	160.419	2.81434
GRAT-52	185.07	16808.1	1.47374	21.6658	13.8468	0.160622	13.9622	0.0252394	1.7912	0.128289	160.684	2.8426	151.248	19.6224	5.7449	334.734	160.684	2.8426
GRAT-34	739.455	89666.5	2.09769	20.2616	3.02917	0.172212	4.07638	0.0253068	2.72782	0.669177	161.108	4.34028	161.337	6.0809	164.676	70.7983	161.108	4.34028
GRAT-59	350.887	41002.8	1.14639	20.8415	4.90149	0.167741	5.27662	0.0253552	1.954	0.370312	161.413	3.11484	157.457	7.6964	98.3531	116.039	161.413	3.11484
GRAT-52	338.316	24654.7	1.24207	20.5801	6.12863	0.171197	6.25142	0.0255531	1.23295	0.197228	162.656	1.98038	160.457	9.27869	128.145	144.31	162.656	1.98038
GRAT-92	505.656	44258.9	1.53054	20.0323	3.86432	0.176064	4.34506	0.02558	1.9866	0.457209	162.826	3.19419	164.668	6.60498	191.258	89.9217	162.826	3.19419
GRAT-91	675.522	53667.7	2.0826	20.7046	3.31917	0.1707	6.14063	0.0256331	5.16629	0.841328	163.159	8.32349	160.027	9.09166	113.897	78.3535	163.159	8.32349
GRAT-71	501.468	37425.1	1.96993	19.9355	2.64176	0.177605	2.87199	0.0256792	1.12669	0.392304	163.449	1.81842	165.998	4.39816	202.496	61.3295	163.449	1.81842
GRAT-2	183.052	17713.3	1.26196	20.3889	10.8975	0.174901	11.3049	0.0258633	3.00766	0.266049	164.606	4.88812	163.663	17.0895	150.031	256.027	164.606	4.88812
GRAT-65	270.474	142189	5.76636	17.3743	2.3441	0.633697	3.44248	0.0798524	2.52109	0.732345	495.242	12.0179	498.396	13.5593	512.888	51.5125	495.242	12.0179
GRAT-77	130.446	135936	2.4787	13.8867	1.64898	1.67348	1.84153	0.168546	0.819829	0.445188	1004.09	7.62279	998.51	11.705	986.246	33.5465	986.246	33.5465
GRAT-44	152.049	92647.2	3.90097	13.5441	1.3752	1.76481	2.45073	0.17336	2.02852	0.827722	1030.6	19.3204	1032.62	15.8852	1036.88	27.7928	1036.88	27.7928
GRAT-3	97.8796	86330.8	0.850997	13.5417	2.41264	1.76382	2.65063	0.17323	1.09772	0.414134	1029.89	10.4484	1032.25	17.1777	1037.25	48.7184	1037.25	48.7184
GRAT-30	338.052	176538	2.83759	13.3904	0.345391	1.87791	2.62421	0.182375	2.60138	0.991301	1079.94	25.8663	1073.33	17.3887	1059.94	6.95092	1059.94	6.95092
GRAT-76	44.0891	22493.6	0.834557	13.292	3.70197	1.91321	4.57272	0.184438	2.68425	0.587013	1091.18	26.9452	1085.71	30.5019	1074.76	74.3754	1074.76	74.3754
GRAT-69	44.4286	56384.9	1.36094	13.1949	2.82819	1.9698	3.11419	0.188507	1.30367	0.418621	1113.28	13.3294	1105.24	20.9765	1089.45	56.6773	1089.45	56.6773
GRAT-89	56.9197	28785.8	1.14384	12.8342	2.98671	1.93375	3.6081	0.179998	2.02435	0.561056	1066.96	19.9063	1092.84	24.1528	1144.74	59.3562	1144.74	59.3562
GRAT-29	207.28	151971	1.94294	12.8288	1.15397	2.08902	1.34654	0.194369	0.693918	0.515335	1145	7.27974	1145.2	9.2466	1145.6	22.9308	1145.6	22.9308
GRAT-4	43.2281	37889.9	1.10673	12.8197	2.43073	2.11761	3.15518	0.19689	2.01164	0.637568	1158.59	21.3324	1154.56	21.7643	1147.01	48.2824	1147.01	48.2824
GRAT-93	171.169	270720	1.63679	12.7997	1.00786	2.13145	2.15844	0.197867	1.90869	0.884289	1163.85	20.3244	1159.05	14.9187	1150.1	20.0028	1150.1	20.0028
GRAT-55	161.363	140526	1.55308	12.6794	1.61901	2.17934	1.89818	0.200412	0.990909	0.522031	1177.53	10.6646	1174.47	13.2123	1168.8	32.063	1168.8	32.063
GRAT-32	46.0244	50612.2	1.1416	12.4467	2.83198	2.31246	3.26933	0.20875	1.63352	0.499649	1222.16	18.1858	1216.11	23.1786	1205.39	55.8029	1205.39	55.8029
GRAT-56	406.839	237189	2.59387	12.072	0.602066	2.00621	2.10562	0.175652	2.01771	0.958249	1043.18	19.4335	1117.61	14.269	1265.35	11.7573	1265.35	11.7573
GRAT-39	105.018	107450	2.06502	11.2636	0.781304	2.94704	1.91036	0.240748	1.74329	0.912543	1390.58	21.8056	1394.09	14.4841	1399.43	14.9746	1399.43	14.9746
GRAT-45	114.44	131355	0.91462	10.6648	0.801914	3.42519	1.84549	0.264935	1.66216	0.90066	1515.04	22.4421	1510.19	14.5052	1503.39	15.1542	1503.39	15.1542
GRAT-51	211.743	197522	1.20271	9.69099	0.451103	3.95325	4.21965	0.277857	4.19547	0.994269	1580.56	58.8098	1624.66	34.2086	1682.23	8.32949	1682.23	8.32949
GRAT-83	246.757	300469	2.15757	9.61884	0.422263	4.4306	1.90656	0.309089	1.85921	0.975165	1736.22	28.2986	1718.08	15.7954	1696.02	7.78157	1696.02	7.78157
GRAT-94	118.347	357077	2.47481	9.15203	0.685786	4.90724	1.79991	0.325727	1.66414	0.92457	1817.64	26.3578	1803.5	15.1832	1787.19	12.496	1787.19	12.496
GRAT-78	87.9569	165570	0.942815	8.92641	0.756995	5.15921	1.22593	0.334009	0.964292	0.786581	1857.78	15.5642	1845.91	10.4272	1832.54	13.7191	1832.54	13.7191
GRAT-50	64.649	75018.4	1.64515	8.78384	1.27835	4.95345	3.16472	0.315566	2.89504	0.914786	1768.04	44.767	1811.41	26.7426	1861.67	23.0848	1861.67	23.0848
GRAT-81	48.795	37014.2	0.853354	8.69875	1.38415	5.31002	1.93075	0.335005	1.34608	0.69718	1862.6	21.775	1870.48	16.4991	1879.23	24.9428	1879.23	24.9428
GRAT-21	105.445	127048	2.75449	8.29221	0.498585	6.05171	1.61689	0.363955	1.5381	0.95127	2000.89	26.4577	1983.32	14.0903	1965.03	8.892	1965.03	8.892
GRAT-80	270.416	527335	6.04659	7.16812	0.947849	7.1952	2.93475	0.374065	2.77747	0.946408	2048.5	48.7434	2135.91	26.1686	2221.08	16.4249	2221.08	16.4249
GRAT-43	275.605	26887.3	1.25806	5.39524	0.144906	12.351	3.13478	0.483296	3.13143	0.998931	2541.61	65.7751	2631.46	29.4542	2701.31	2.39263	2701.31	2.39263
GRAT-60	30.8063	59013.6	0.58717	5.29114	0.918734	14.5516	2.74914	0.558418	2.59108	0.942506	2860.09	59.8531	2786.38	26.1251	2733.43	15.1212	2733.43	15.1212
GRAT-58	34.9478	61290.4	0.703851	5.20376	0.752958	14.3318	1.40795	0.5409	1.1897	0.844985	2787.21	26.9215	2771.92	13.3644	2760.8	12.3642	2760.8	12.3642
Firehole Mesa, Tbc FC facies, FC-102911A-1A. U-Pb geochronologic analyses.
							Isotope ratios						Apparent ages (Ma)
Analysis	U	206Pb	U/Th	206Pb*	±	207Pb*	±	206Pb*	±	error	206Pb*	±	207Pb*	±	206Pb*	±	Best age	±
	(ppm)	204Pb		207Pb*	(%)	235U*	(%)	238U	(%)	corr.	238U*	(Ma)	235U	(Ma)	207Pb*	(Ma)	(Ma)	(Ma)
FC-102911-1A-91	732.541	36303.5	1.82311	21.6204	12.3314	0.0312917	13.6712	0.00490672	5.90228	0.431732	31.5534	1.85782	31.2861	4.21197	10.7853	297.562	31.5534	1.85782
FC-102911-1A-12	78.7676	3273.85	1.69138	-2.49801	552.468	-0.275004	553.429	0.00498233	32.6094	0.0589225	32.0384	10.4216	-326.536	NA	NA	NA	32.0384	10.4216
FC-102911-1A-13	413.502	18355.1	3.22353	25.2902	36.0305	0.0278061	36.1805	0.00510025	3.2918	0.0909826	32.7948	1.0768	27.8485	9.93912	-380.826	962.282	32.7948	1.0768
FC-102911-1A-76	280.177	10648.2	1.4774	22.7896	24.2192	0.0310209	24.8669	0.00512731	5.63873	0.226756	32.9683	1.85425	31.0194	7.59709	-117.418	604.578	32.9683	1.85425
FC-102911-1A-18	184.38	9303.22	0.894105	18.3783	34.7468	0.0386693	35.4667	0.00515432	7.10974	0.200462	33.1415	2.35023	38.524	13.408	388.115	802.383	33.1415	2.35023
FC-102911-1A-25	289.7	6708.69	2.31869	24.6737	54.8643	0.0288403	55.8923	0.00516098	10.6706	0.190913	33.1842	3.53185	28.8696	15.91	-317.121	1510.62	33.1842	3.53185
FC-102911-1A-53	272.211	14493.7	2.87167	25.4352	47.7863	0.0280646	47.9991	0.00517718	4.51491	0.0940624	33.2882	1.49906	28.1038	13.3053	-395.705	1310.59	33.2882	1.49906
FC-102911-1A-96	73.662	3353.04	1.21341	3.20758	408.784	0.222747	409.065	0.0051819	15.1578	0.0370547	33.3184	5.03731	204.194	976.855	3529.65	324.452	33.3184	5.03731
FC-102911-1A-2	572.754	28751.7	0.837164	22.9421	14.0809	0.0311461	14.3446	0.00518245	2.73789	0.190865	33.3219	0.909963	31.1427	4.39952	-133.884	349.7	33.3219	0.909963
FC-102911-1A-87	1758.56	51820.7	2.088	21.4697	7.03869	0.0333477	7.29244	0.00519266	1.90694	0.261495	33.3874	0.635031	33.3084	2.38959	27.6338	168.936	33.3874	0.635031
FC-102911-1A-15	236.122	12395.7	1.08948	12.6733	120.216	0.0567988	120.366	0.0052207	6.00637	0.0499011	33.5672	2.01093	56.0942	65.7789	1169.76	321.889	33.5672	2.01093
FC-102911-1A-17	423.392	9472.14	1.7317	24.6072	32.9091	0.0293161	33.0478	0.00523199	3.02365	0.0914932	33.6396	1.01449	29.3391	9.55746	-310.203	862.437	33.6396	1.01449
FC-102911-1A-65	427.614	38833.7	1.70351	22.4732	16.632	0.032108	19.5272	0.00523333	10.2317	0.523971	33.6482	3.43381	32.0895	6.16827	-83.0675	409.702	33.6482	3.43381
FC-102911-1A-21	262.241	12110.2	2.74248	27.6196	53.6968	0.0261312	53.966	0.0052345	5.3833	0.0997535	33.6558	1.80707	26.1924	13.9551	-615.297	1563.18	33.6558	1.80707
FC-102911-1A-79	110.944	3920.06	0.795712	8.43805	80.1558	0.0860872	81.3804	0.00526841	14.0646	0.172825	33.8732	4.75163	83.8519	65.5884	1933.88	399.72	33.8732	4.75163
FC-102911-1A-32	286.114	10053	4.44716	24.1803	30.0702	0.0300522	30.276	0.00527031	3.52417	0.116402	33.8854	1.19105	30.0649	8.96926	-265.587	778.036	33.8854	1.19105
FC-102911-1A-52	205.093	7177.85	1.57964	20.4427	41.7728	0.0355817	42.5016	0.00527551	7.8371	0.184395	33.9187	2.65127	35.5012	14.8289	143.864	1020.65	33.9187	2.65127
FC-102911-1A-6	226.447	8591.52	1.60211	23.6593	61.7077	0.0308568	62.2116	0.00529482	7.90167	0.127013	34.0426	2.68284	30.8578	18.9105	-210.593	1705.03	34.0426	2.68284
FC-102911-1A-58	517.964	23604.4	2.70519	25.9309	19.3037	0.0282158	19.7495	0.00530652	4.17251	0.211272	34.1176	1.4198	28.2531	5.50299	-446.262	512.098	34.1176	1.4198
FC-102911-1A-38	180.099	5662.06	0.599751	27.8102	26.8993	0.0265295	27.8112	0.00535097	7.0636	0.253984	34.4026	2.42359	26.5865	7.2982	-634.096	747.337	34.4026	2.42359
FC-102911-1A-94	305.419	11543.1	1.99158	20.951	32.2748	0.0352333	32.7128	0.00535373	5.3348	0.16308	34.4203	1.83136	35.1595	11.3053	85.9539	783.389	34.4203	1.83136
FC-102911-1A-29	373.321	13417.4	1.84809	18.6533	20.5729	0.0396669	21.1672	0.0053664	4.98047	0.235292	34.5016	1.71375	39.4987	8.20042	354.711	469.035	34.5016	1.71375
FC-102911-1A-97	171.48	8284.45	0.622356	38.2621	78.2783	0.0194535	78.6648	0.0053984	7.7886	0.0990099	34.7067	2.6959	19.5631	15.2431	NA	NA	34.7067	2.6959
FC-102911-1A-41	176.722	12022.2	1.97371	24.2633	51.1037	0.0307	51.9772	0.00540239	9.48906	0.182562	34.7323	3.28691	30.7033	15.7211	-274.286	1380.43	34.7323	3.28691
FC-102911-1A-77	289.64	12208.9	1.99884	18.8113	35.2211	0.0396718	36.0436	0.00541251	7.65594	0.212408	34.7972	2.65688	39.5035	13.9659	335.633	821.436	34.7972	2.65688
FC-102911-1A-22	260.926	28143.7	3.1238	22.6389	27.8342	0.0331963	28.7009	0.0054506	7.00013	0.243899	35.0414	2.44629	33.1595	9.36363	-101.089	695.518	35.0414	2.44629
FC-102911-1A-95	104.508	2734.55	1.59475	6.28835	159.603	0.121868	160.239	0.00555808	14.2642	0.0890186	35.7305	5.08258	116.764	178.563	2445.3	324.142	35.7305	5.08258
FC-102911-1A-55	440.732	15862.3	1.9135	29.7338	38.427	0.0260079	38.7771	0.00560859	5.19957	0.134088	36.0543	1.86943	26.0704	9.98099	-820.899	1128.93	36.0543	1.86943
FC-102911-1A-28	481.447	17965.4	1.47534	21.7348	15.0943	0.0358875	16.098	0.00565714	5.5953	0.347577	36.3655	2.02903	35.8009	5.66288	-1.8743	365.705	36.3655	2.02903
FC-102911-1A-84	133.677	7138.39	1.05244	13.3132	170.27	0.0590005	170.496	0.00569689	8.7705	0.0514412	36.6203	3.20268	58.2074	96.7417	1071.55	700.152	36.6203	3.20268
FC-102911-1A-35	99.2577	7291.42	1.37384	14.4001	52.3907	0.0552264	52.9309	0.00576781	7.54282	0.142503	37.0748	2.78846	54.5822	28.1353	911.936	1161.52	37.0748	2.78846
FC-102911-1A-71	615.378	19362.9	0.683218	22.6102	18.2608	0.0354183	18.5312	0.00580806	3.15437	0.170219	37.3328	1.17421	35.3409	6.43654	-97.9685	451.642	37.3328	1.17421
FC-102911-1A-33	241.696	13089.5	1.63986	36.0854	40.3362	0.0224052	40.6396	0.00586381	4.95632	0.121958	37.6902	1.8626	22.4988	9.0431	NA	NA	37.6902	1.8626
FC-102911-1A-70	140.511	8714.52	0.793315	30.347	79.6806	0.0270154	80.2189	0.00594601	9.2777	0.115655	38.2169	3.53516	27.067	21.4292	-879.454	2757.1	38.2169	3.53516
FC-102911-1A-61	77.6153	6197.88	1.49295	12.2758	105.01	0.0670956	105.822	0.00597367	13.0904	0.123701	38.3942	5.01099	65.9395	67.6613	1232.62	184.051	38.3942	5.01099
FC-102911-1A-49	181.044	6160.54	1.43822	30.0737	38.6181	0.0279743	39.798	0.00610162	9.61893	0.241694	39.214	3.76052	28.0146	10.9973	-853.407	1142.88	39.214	3.76052
FC-102911-1A-16	59.7317	2248.9	1.42426	11.0456	35.7096	0.0831595	48.8947	0.00666193	33.3994	0.683088	42.8031	14.2487	81.111	38.1343	1436.8	704.263	42.8031	14.2487
FC-102911-1A-9	55.1534	3489.41	1.18754	1.25339	1240.16	0.748633	1240.41	0.00680542	24.6776	0.0198948	43.7219	10.753	567.431	NA	NA	NA	43.7219	10.753
FC-102911-1A-31	649.387	94855.3	2.02602	21.4868	12.4925	0.0447452	12.8028	0.00697297	2.80133	0.218807	44.7947	1.2505	44.4464	5.56768	25.714	300.629	44.7947	1.2505
FC-102911-1A-7	166.606	17076.7	1.09277	25.1419	30.4497	0.0386996	31.3114	0.00705673	7.29514	0.232987	45.3309	3.29535	38.5537	11.8459	-365.571	804.064	45.3309	3.29535
FC-102911-1A-19	586.724	31194.4	1.54045	21.6741	13.4818	0.0454326	13.7551	0.0071418	2.72851	0.198364	45.8754	1.24727	45.1142	6.06974	4.84883	325.917	45.8754	1.24727
FC-102911-1A-47	158.124	8541.47	1.55037	46.2746	128.644	0.0215996	128.821	0.00724915	6.76334	0.0525017	46.5624	3.13783	21.6983	27.6624	NA	NA	46.5624	3.13783
FC-102911-1A-4	691.698	43401.8	1.7829	20.5019	10.5428	0.048827	10.6639	0.00726028	1.60265	0.150287	46.6337	0.744676	48.4057	5.04086	137.095	248.245	46.6337	0.744676
FC-102911-1A-62	136.691	4690.7	1.13074	27.4596	127.638	0.0366131	128.015	0.0072917	9.8093	0.0766264	46.8348	4.57752	36.5119	45.9415	-599.479	0	46.8348	4.57752
FC-102911-1A-46	146.962	6026.4	1.06342	16.8288	92.206	0.0602375	92.454	0.00735223	6.76721	0.0731954	47.2221	3.18395	59.3927	53.385	582.585	533.725	47.2221	3.18395
FC-102911-1A-14	384.855	13397.9	1.08187	20.3828	16.0168	0.0499151	16.2776	0.00737897	2.90223	0.178296	47.3933	1.37042	49.4586	7.85791	150.763	377.398	47.3933	1.37042
FC-102911-1A-26	319.884	13394.4	2.77611	21.1092	14.1982	0.0490219	14.5911	0.00750517	3.36351	0.230518	48.2008	1.61519	48.5945	6.92359	68.0817	339.299	48.2008	1.61519
FC-102911-1A-11	105.726	3433.13	1.08562	2.77644	1207.7	0.373271	1207.79	0.00751642	14.8549	0.0122992	48.2728	7.1441	322.075	NA	3750.59	714.843	48.2728	7.1441
FC-102911-1A-60	2001.35	134221	2.51096	21.7813	3.90102	0.0477695	4.28073	0.00754629	1.76258	0.411748	48.4639	0.851013	47.3815	1.98168	-7.03583	94.1871	48.4639	0.851013
FC-102911-1A-57	643.175	28817.8	1.36094	22.6869	9.17835	0.0464775	9.25329	0.00764745	1.17531	0.127015	49.1111	0.575013	46.1286	4.17293	-106.296	226.169	49.1111	0.575013
FC-102911-1A-51	126.362	10638.5	0.91547	25.0945	42.7101	0.0606724	43.2881	0.0110425	7.05066	0.162877	70.7945	4.96417	59.8091	25.1477	-360.685	1150.18	70.7945	4.96417
FC-102911-1A-40	108.373	34676.2	1.15297	23.3285	46.6112	0.0697487	48.056	0.0118011	11.6953	0.243368	75.6292	8.79339	68.461	31.8254	-175.363	1221.38	75.6292	8.79339
FC-102911-1A-48	183.065	32739	2.01741	20.2674	18.1324	0.100446	19.0937	0.0147649	5.9823	0.313312	94.4848	5.61115	97.1881	17.6982	164.01	426.875	94.4848	5.61115
FC-102911-1A-81	308.729	15993.3	1.70715	19.723	16.4426	0.104181	16.6819	0.0149025	2.81537	0.168768	95.359	2.66495	100.628	15.983	227.293	382.167	95.359	2.66495
FC-102911-1A-37	255.947	28224.4	1.69555	20.9551	8.49115	0.0982822	9.05453	0.014937	3.14401	0.347231	95.578	2.98282	95.1895	8.22747	85.4877	201.692	95.578	2.98282
FC-102911-1A-1	680.912	67331.1	1.68307	20.7632	4.82278	0.100401	5.01881	0.0151192	1.38898	0.276755	96.7353	1.3336	97.1461	4.64964	107.262	113.973	96.7353	1.3336
FC-102911-1A-98	761.249	75877.8	3.04166	20.6755	6.44887	0.110454	6.98157	0.0165628	2.67477	0.383118	105.896	2.80934	106.38	7.0513	117.23	152.172	105.896	2.80934
FC-102911-1A-59	836.6	181490	2.76262	20.4369	2.96043	0.11327	3.22469	0.016789	1.27847	0.396463	107.331	1.36083	108.952	3.33145	144.514	69.4889	107.331	1.36083
FC-102911-1A-100	178.353	39008	1.67353	19.9918	16.2066	0.169677	16.3155	0.0246022	1.88227	0.115367	156.676	2.91353	159.138	24.0363	195.964	378.767	156.676	2.91353
FC-102911-1A-78	91.675	22623.6	1.43118	21.2163	18.3838	0.161929	18.6494	0.0249169	3.13647	0.16818	158.656	4.91546	152.39	26.396	56.0221	441.625	158.656	4.91546
FC-102911-1A-67	475.502	82344.2	0.938101	20.8184	3.27633	0.168576	3.81145	0.0254532	1.94752	0.510965	162.028	3.1162	158.182	5.58293	100.959	77.4984	162.028	3.1162
FC-102911-1A-74	326.823	65839.1	0.972187	19.2264	5.72978	0.18267	6.02696	0.0254721	1.86918	0.310136	162.147	2.99301	170.356	9.45246	285.939	131.077	162.147	2.99301
FC-102911-1A-56	136.461	44923.6	2.27958	20.7037	11.5542	0.275748	11.9042	0.0414057	2.86543	0.240707	261.54	7.34427	247.279	26.1321	114.01	273.359	261.54	7.34427
FC-102911-1A-45	131.138	187152	3.16613	17.2515	3.44523	0.700426	3.82146	0.0876371	1.65347	0.432681	541.548	8.58854	539.045	15.9845	528.493	75.4985	541.548	8.58854
FC-102911-1A-54	167.503	132713	0.872928	16.6649	1.61255	0.802014	1.96284	0.0969357	1.11911	0.570148	596.426	6.37518	597.964	8.87052	603.783	34.8928	596.426	6.37518
FC-102911-1A-64	55.9915	34677.4	1.3996	15.9246	9.38618	0.869292	9.61285	0.1004	2.07518	0.215875	616.75	12.2055	635.183	45.4213	701.354	200.24	616.75	12.2055
FC-102911-1A-10	214.8	102172	1.36199	15.8724	1.30797	0.964553	1.69111	0.111037	1.07195	0.633873	678.768	6.90609	685.652	8.4309	708.288	27.8368	678.768	6.90609
FC-102911-1A-24	76.276	102782	1.61618	13.9271	2.83151	1.64275	3.13939	0.165932	1.35585	0.431883	989.66	12.4391	986.77	19.8174	980.329	57.6685	980.329	57.6685
FC-102911-1A-39	65.6753	198986	2.53633	13.8595	2.25158	1.63686	2.81298	0.164535	1.68618	0.59943	981.929	15.3578	984.503	17.7323	990.267	45.7999	990.267	45.7999
FC-102911-1A-93	61.1669	78970.5	1.28014	13.7602	3.02715	1.71845	3.71438	0.171498	2.15243	0.579486	1020.36	20.3126	1015.45	23.8458	1004.85	61.4599	1004.85	61.4599
FC-102911-1A-50	85.1032	157659	2.83186	13.7136	1.92872	1.71654	2.49553	0.170728	1.58359	0.634568	1016.12	14.8871	1014.73	16.0128	1011.72	39.1025	1011.72	39.1025
FC-102911-1A-88	30.7381	41565.6	1.34682	13.6701	4.99813	1.77552	5.25406	0.176033	1.61982	0.308299	1045.26	15.6301	1036.54	34.1404	1018.16	101.283	1018.16	101.283
FC-102911-1A-75	35.5592	120054	2.99745	13.6026	6.0912	1.72212	6.22444	0.169896	1.28098	0.205799	1011.54	11.9922	1016.82	40.0047	1028.17	123.284	1028.17	123.284
FC-102911-1A-44	81.9459	118302	1.80355	13.5304	2.35627	1.74435	3.38462	0.171176	2.42974	0.717877	1018.59	22.8928	1025.07	21.8474	1038.93	47.5805	1038.93	47.5805
FC-102911-1A-27	307.291	324633	0.859951	13.4311	0.574787	1.82907	1.19314	0.178173	1.04557	0.876313	1056.99	10.193	1055.95	7.83281	1053.81	11.5976	1053.81	11.5976
FC-102911-1A-85	204.196	550788	1.52942	13.3042	1.10667	1.8674	1.8646	0.180188	1.50067	0.804823	1068	14.7699	1069.61	12.3307	1072.92	22.2288	1072.92	22.2288
FC-102911-1A-99	33.8731	77646.2	2.35471	13.0529	4.13534	2.044	4.3522	0.193503	1.35668	0.311722	1140.32	14.1794	1130.3	29.6824	1111.07	82.6345	1111.07	82.6345
FC-102911-1A-42	55.0891	86476.9	1.93956	13.0097	3.96237	2.08467	4.955	0.1967	2.97517	0.600438	1157.57	31.5249	1143.77	34.0145	1117.72	79.1073	1117.72	79.1073
FC-102911-1A-5	38.0503	57393.1	1.00582	12.9954	2.7529	1.97119	3.52413	0.185788	2.20024	0.624335	1098.52	22.2228	1105.71	23.7443	1119.92	54.9191	1119.92	54.9191
FC-102911-1A-68	41.6653	77811.9	2.29316	12.8302	4.30778	2.0991	4.94617	0.195329	2.43056	0.491402	1150.18	25.6038	1148.51	34.0298	1145.39	85.6402	1145.39	85.6402
FC-102911-1A-36	19.3927	52836.2	0.846102	12.5481	8.27199	1.96382	9.18528	0.178722	3.99294	0.434711	1059.99	39.0286	1103.19	61.8741	1189.43	163.593	1189.43	163.593
FC-102911-1A-80	84.6846	49367.3	2.01423	12.4528	1.89497	2.15759	2.45716	0.194866	1.56421	0.636591	1147.68	16.4449	1167.5	17.0497	1204.42	37.355	1204.42	37.355
FC-102911-1A-34	153.497	8883.84	1.24127	12.2877	4.55575	1.99255	4.95634	0.177574	1.95203	0.393845	1053.71	18.9756	1112.99	33.521	1230.71	89.4461	1230.71	89.4461
FC-102911-1A-43	87.0743	169110	1.66077	11.2454	1.38787	2.97331	2.36396	0.242501	1.91366	0.809518	1399.68	24.077	1400.82	17.964	1402.54	26.5897	1402.54	26.5897
FC-102911-1A-82	113.071	140159	1.44738	10.9982	0.724697	3.11564	1.54641	0.248523	1.36609	0.883394	1430.85	17.5295	1436.56	11.8873	1444.99	13.8041	1444.99	13.8041
FC-102911-1A-63	108.858	172038	1.768	10.1545	0.73861	3.745	3.66583	0.27581	3.59065	0.979492	1570.23	50.0408	1581.04	29.3859	1595.49	13.7912	1595.49	13.7912
FC-102911-1A-69	66.7535	76301.1	1.12235	10.0225	0.898989	3.70711	1.47281	0.269471	1.16661	0.7921	1538.11	15.9637	1572.9	11.7781	1619.88	16.7312	1619.88	16.7312
FC-102911-1A-92	102.547	634277	1.53529	9.41939	0.602963	4.35698	1.70892	0.297651	1.59901	0.935686	1679.65	23.644	1704.22	14.1138	1734.54	11.0586	1734.54	11.0586
FC-102911-1A-3	313.692	1.26302e+06	2.2911	9.40626	0.701498	3.63531	7.89428	0.248003	7.86305	0.996044	1428.17	100.736	1557.3	62.9449	1737.1	12.862	1737.1	12.862
FC-102911-1A-30	169.573	350293	1.01155	9.3716	0.438311	4.55797	0.999507	0.309802	0.898275	0.898718	1739.73	13.6964	1741.62	8.32302	1743.87	8.02898	1743.87	8.02898
FC-102911-1A-72	525.723	1.35708e+06	6.15251	9.17079	0.0835873	4.61867	2.05683	0.307201	2.05513	0.999174	1726.92	31.1344	1752.65	17.1693	1783.45	1.52399	1783.45	1.52399
FC-102911-1A-83	179.238	408282	2.02841	9.03449	0.47087	4.88759	1.67512	0.320256	1.60758	0.95968	1790.98	25.1381	1800.12	14.1209	1810.71	8.55442	1810.71	8.55442
FC-102911-1A-86	70.1711	208691	1.32832	8.83048	0.904007	5.08196	2.64332	0.325472	2.48394	0.939701	1816.4	39.3194	1833.1	22.4305	1852.1	16.3428	1852.1	16.3428
FC-102911-1A-73	83.0004	159394	2.38182	8.75764	0.70983	5.18679	1.50056	0.329446	1.32205	0.881039	1835.7	21.1194	1850.45	12.7744	1867.06	12.8107	1867.06	12.8107
FC-102911-1A-23	176.45	213383	1.19321	8.20959	0.368447	6.07938	1.9585	0.361976	1.92353	0.982145	1991.53	32.9558	1987.29	17.0789	1982.87	6.55886	1982.87	6.55886
FC-102911-1A-90	42.9141	117431	0.718411	7.81458	1.49867	6.74611	2.03364	0.382347	1.37466	0.675959	2087.24	24.5107	2078.68	17.9854	2070.2	26.4111	2070.2	26.4111
FC-102911-1A-8	67.3117	325823	1.05001	5.52097	0.735009	12.5879	1.37451	0.504042	1.16149	0.845016	2631.14	25.0923	2649.32	12.9301	2663.21	12.1797	2663.21	12.1797
FC-102911-1A-66	65.9278	206515	0.509869	5.2231	0.681919	14.1021	1.60387	0.53421	1.45168	0.905112	2759.16	32.5851	2756.6	15.2082	2754.71	11.204	2754.71	11.204
FC-102911-1A-89	329.954	4.14992e+06	1.485	3.42202	0.376581	26.4839	2.4343	0.657299	2.405	0.987962	3256.66	61.4905	3364.57	23.8225	3429.48	5.85177	3429.48	5.85177
Firehole Mesa, Tbc UMG facies, FC-82711-2. U-Pb geochronologic analyses.
							Isotope ratios						Apparent ages (Ma)
Analysis	U	206Pb	U/Th	206Pb*	±	207Pb*	±	206Pb*	±	error	206Pb*	±	207Pb*	±	206Pb*	±	Best age	±
	(ppm)	204Pb		207Pb*	(%)	235U*	(%)	238U	(%)	corr.	238U*	(Ma)	235U	(Ma)	207Pb*	(Ma)	(Ma)	(Ma)
FC-82711-2-50	939.67	14711.8	0.50019	21.3031	11.6792	0.0336425	11.9581	0.00519792	2.56762	0.214718	33.4211	0.855908	33.598	3.95197	46.2347	279.864	33.4211	0.855908
FC-82711-2-67	295.681	3876.45	2.99776	17.9084	27.8683	0.040751	28.709	0.00529289	6.89673	0.240229	34.0302	2.34079	40.557	11.4145	445.981	630.553	34.0302	2.34079
FC-82711-2-76	580.539	8482.19	1.90776	23.0718	19.0648	0.0341093	19.2707	0.0057076	2.80943	0.145787	36.689	1.02782	34.0565	6.45417	-147.85	476.409	36.689	1.02782
FC-82711-2-53	143.675	1819.81	1.61941	18.9925	41.6687	0.0513265	42.141	0.00707003	6.29174	0.149302	45.416	2.84742	50.8226	20.893	313.869	987.795	45.416	2.84742
FC-82711-2-29	198.861	3061.01	1.52079	19.2753	39.7267	0.0534978	40.4132	0.00747886	7.41719	0.183534	48.0324	3.54942	52.9176	20.8409	280.142	943.471	48.0324	3.54942
FC-82711-2-87	440.581	2523.74	1.54679	21.9851	13.3712	0.0497849	13.8473	0.00793824	3.5998	0.259964	50.9711	1.82763	49.3327	6.66806	-29.5586	325.339	50.9711	1.82763
FC-82711-2-58	202.907	11606.7	0.998069	19.3868	10.1769	0.188065	11.9803	0.0264431	6.32135	0.527644	168.248	10.498	174.976	19.2583	266.885	234.007	168.248	10.498
FC-82711-2-90	106.561	20243.6	1.69229	20.0244	9.56837	0.418622	9.95957	0.0607966	2.76392	0.277514	380.468	10.2116	355.065	29.8504	192.184	222.936	380.468	10.2116
FC-82711-2-25	160.392	52940.9	1.02155	15.3363	1.59151	1.15903	2.32987	0.128918	1.70159	0.730337	781.688	12.5263	781.498	12.7005	780.934	33.4697	781.688	12.5263
FC-82711-2-79	42.8489	18918.2	3.01438	14.1137	5.87786	1.58113	6.36914	0.161849	2.4529	0.385123	967.042	22.0272	962.815	39.636	953.194	120.347	953.194	120.347
FC-82711-2-91	38.7609	21657.8	0.982934	14.103	4.37769	1.63435	4.66446	0.167169	1.61028	0.345222	996.496	14.8676	983.538	29.3917	954.708	89.5638	954.708	89.5638
FC-82711-2-89	67.202	37826.6	2.31001	14.0342	2.81314	1.64853	3.32901	0.167796	1.78003	0.534704	999.958	16.4878	988.986	21.0426	964.742	57.4498	964.742	57.4498
FC-82711-2-59	293.233	84426.2	1.03938	13.8552	1.01424	1.67193	1.92835	0.168007	1.64008	0.850509	1001.12	15.2078	997.92	12.2527	990.907	20.6267	990.907	20.6267
FC-82711-2-82	63.2313	19790.5	4.23211	13.836	4.2055	1.69694	4.7118	0.170284	2.12482	0.450957	1013.68	19.9308	1007.38	30.1119	993.688	85.5437	993.688	85.5437
FC-82711-2-6	182.678	103356	2.31802	13.7873	1.28534	1.61898	1.8401	0.161889	1.31677	0.715596	967.266	11.8272	977.594	11.5505	1000.85	26.0889	1000.85	26.0889
FC-82711-2-77	163.678	93738.9	2.95131	13.7813	1.11159	1.65383	1.44763	0.165302	0.927369	0.64061	986.175	8.48029	991.018	9.16048	1001.73	22.5689	1001.73	22.5689
FC-82711-2-63	105.643	48296.4	2.76669	13.6901	1.68551	1.76497	2.37718	0.175244	1.67633	0.705174	1040.94	16.1136	1032.67	15.4089	1015.19	34.1535	1015.19	34.1535
FC-82711-2-98	78.318	29539.5	1.96286	13.6896	3.42374	1.67126	4.00697	0.165933	2.08178	0.51954	989.663	19.0991	997.665	25.4604	1015.28	69.3999	1015.28	69.3999
FC-82711-2-22	131.24	66534.2	1.84741	13.6861	2.22483	1.69733	3.13959	0.168479	2.21521	0.705573	1003.73	20.5901	1007.53	20.0628	1015.79	45.0839	1015.79	45.0839
FC-82711-2-57	34.0397	16368.3	1.45928	13.6817	6.71952	1.77279	7.43092	0.175912	3.17281	0.426973	1044.6	30.5975	1035.54	48.277	1016.44	136.248	1016.44	136.248
FC-82711-2-39	190.245	132366	1.25691	13.6589	0.585431	1.72271	1.96224	0.170657	1.87287	0.954457	1015.73	17.6004	1017.03	12.6071	1019.82	11.853	1019.82	11.853
FC-82711-2-21	109.975	38849.7	2.63232	13.6484	1.75879	1.73607	2.26929	0.17185	1.434	0.631914	1022.3	13.5564	1022.01	14.6214	1021.37	35.6185	1021.37	35.6185
FC-82711-2-27	77.7183	37324.7	2.23381	13.5872	2.07976	1.75271	3.03702	0.172719	2.21317	0.728729	1027.07	21.0126	1028.16	19.6373	1030.46	42.0513	1030.46	42.0513
FC-82711-2-75	367.788	57675.2	2.55083	13.5808	2.19624	1.6722	2.7477	0.164708	1.65118	0.600932	982.888	15.0526	998.024	17.4607	1031.41	44.4021	1031.41	44.4021
FC-82711-2-49	52.7304	27403	0.357177	13.5463	3.56163	1.70155	3.72131	0.167173	1.07839	0.289787	996.517	9.95691	1009.11	23.8033	1036.55	71.9333	1036.55	71.9333
FC-82711-2-1	107.2	15537.5	3.66715	13.5037	2.95285	1.78083	3.72542	0.174412	2.27143	0.609711	1036.37	21.7457	1038.48	24.229	1042.91	59.5939	1042.91	59.5939
FC-82711-2-81	81.9155	40249.7	1.02742	13.4804	2.14407	1.83849	2.93151	0.179748	1.99918	0.681962	1065.6	19.6357	1059.32	19.2818	1046.43	43.2506	1046.43	43.2506
FC-82711-2-95	124.212	55203.1	1.73676	13.4637	1.26888	1.85174	2.00884	0.180819	1.55736	0.775255	1071.44	15.3733	1064.05	13.2455	1048.94	25.5984	1048.94	25.5984
FC-82711-2-1	102.016	49000.7	3.57287	13.414	2.80028	1.83224	2.96122	0.178254	0.962958	0.325189	1057.43	9.3913	1057.08	19.4539	1056.38	56.3972	1056.38	56.3972
FC-82711-2-42	36.9541	19184.6	1.55467	13.4042	7.59939	1.77007	8.248	0.172079	3.20605	0.388707	1023.56	30.3434	1034.55	53.565	1057.86	153.217	1057.86	153.217
FC-82711-2-18	104.726	53525	1.63841	13.3965	2.0019	1.83843	2.27159	0.178623	1.07356	0.472603	1059.45	10.4884	1059.3	14.9403	1059.02	40.2987	1059.02	40.2987
FC-82711-2-73	93.4291	38937.1	2.10984	13.3729	2.43358	1.84846	3.28964	0.179281	2.21346	0.672857	1063.05	21.6924	1062.88	21.6793	1062.56	48.9639	1062.56	48.9639
FC-82711-2-97	80.3802	39221.3	1.13816	13.3272	3.52207	1.82635	4.20186	0.176532	2.29144	0.545338	1048	22.164	1054.97	27.5764	1069.44	70.8078	1069.44	70.8078
FC-82711-2-10	137.343	78867.4	2.93006	13.3161	1.54703	1.85289	2.37622	0.178947	1.80365	0.75904	1061.22	17.6482	1064.46	15.6717	1071.13	31.1023	1071.13	31.1023
FC-82711-2-80	95.4952	48543.7	1.48563	13.3112	1.52387	1.9417	2.89539	0.187455	2.46193	0.850294	1107.58	25.054	1095.59	19.4077	1071.86	30.6335	1071.86	30.6335
FC-82711-2-86	239.726	89719	1.8409	13.3089	0.609935	1.87105	0.936878	0.180603	0.71114	0.759053	1070.27	7.01286	1070.9	6.19959	1072.21	12.2526	1072.21	12.2526
FC-82711-2-28	43.8441	13376.1	1.19661	13.2835	3.37802	1.88615	3.73661	0.181714	1.59727	0.427463	1076.33	15.8333	1076.23	24.8	1076.03	67.8374	1076.03	67.8374
FC-82711-2-51	45.9597	23232.6	1.64115	13.2568	5.00276	1.8861	6.07262	0.181344	3.44226	0.566849	1074.31	34.0637	1076.21	40.3169	1080.04	100.437	1080.04	100.437
FC-82711-2-45	155.713	134279	4.12151	13.1552	1.4954	1.85199	2.26645	0.176699	1.7031	0.751441	1048.92	16.4865	1064.14	14.9451	1095.5	29.9188	1095.5	29.9188
FC-82711-2-43	163.233	68420.5	2.35658	13.1003	1.44076	1.83797	2.3063	0.17463	1.8009	0.78086	1037.57	17.2594	1059.14	15.1673	1103.87	28.7967	1103.87	28.7967
FC-82711-2-17	59.1822	26283.6	2.43371	12.9714	1.98524	2.08363	2.65788	0.196022	1.76723	0.664904	1153.92	18.6715	1143.43	18.2377	1123.6	39.5609	1123.6	39.5609
FC-82711-2-100	63.1941	41963	2.11766	12.8934	2.82394	2.05978	3.11593	0.192613	1.31697	0.422656	1135.52	13.7114	1135.55	21.3016	1135.59	56.2115	1135.59	56.2115
FC-82711-2-38	90.2532	31792.5	2.25022	12.8691	1.70076	1.98529	2.04976	0.185298	1.14409	0.558156	1095.85	11.5298	1110.52	13.842	1139.38	33.8456	1139.38	33.8456
FC-82711-2-14	75.7866	40846.7	2.82769	12.8628	3.3942	2.10129	3.71276	0.19603	1.50463	0.405261	1153.96	15.8976	1149.23	25.5483	1140.32	67.5156	1140.32	67.5156
FC-82711-2-13	185.113	75477.9	1.63547	12.7797	0.719041	2.12711	1.49775	0.197155	1.31387	0.877225	1160.02	13.9485	1157.65	10.345	1153.19	14.2534	1153.19	14.2534
FC-82711-2-99	229.642	176718	3.46348	12.7471	0.527543	2.08841	0.940597	0.193075	0.778731	0.827911	1138.01	8.1239	1145	6.45833	1158.25	10.4596	1158.25	10.4596
FC-82711-2-15	163.867	57267.1	3.07228	12.6179	1.1883	2.17671	1.80421	0.199198	1.35761	0.75247	1171.01	14.5375	1173.63	12.5534	1178.47	23.5042	1178.47	23.5042
FC-82711-2-84	72.1808	29551.2	1.34832	12.6103	1.54889	2.13954	2.09321	0.195679	1.408	0.672652	1152.06	14.8543	1161.68	14.4853	1179.66	30.6125	1179.66	30.6125
FC-82711-2-36	118.567	53754.8	1.63074	12.5977	1.66202	2.09602	2.67978	0.191507	2.10212	0.784437	1129.53	21.7804	1147.5	18.4233	1181.64	32.8359	1181.64	32.8359
FC-82711-2-60	270.442	101313	1.37192	12.5866	0.530026	2.14619	1.22931	0.195917	1.10918	0.902277	1153.35	11.7137	1163.82	8.51501	1183.38	10.4676	1183.38	10.4676
FC-82711-2-44	38.3726	18964.8	2.10116	12.5596	6.20727	2.10309	6.50274	0.191572	1.93791	0.298014	1129.88	20.0846	1149.82	44.7787	1187.62	122.683	1187.62	122.683
FC-82711-2-74	61.934	32487.9	1.48335	12.4915	3.05243	2.16109	3.56264	0.195787	1.83714	0.515668	1152.65	19.3906	1168.62	24.7356	1198.32	60.2017	1198.32	60.2017
FC-82711-2-5	17.6635	5017.18	1.24389	12.4792	6.79155	1.88211	7.82104	0.170345	3.8786	0.495919	1014.01	36.3926	1074.81	51.9047	1200.26	134.012	1200.26	134.012
FC-82711-2-4	48.4912	45561.2	2.68894	12.3479	3.02066	2.30976	3.31966	0.206851	1.37686	0.414759	1212.02	15.2129	1215.29	23.5272	1221.08	59.3795	1221.08	59.3795
FC-82711-2-72	91.6565	53921.7	1.40176	12.2725	2.25628	2.35891	2.50922	0.209963	1.09788	0.43754	1228.62	12.2813	1230.25	17.8948	1233.13	44.2557	1233.13	44.2557
FC-82711-2-24	838.279	428517	2.7946	12.2177	0.227883	2.34547	1.29691	0.207834	1.27673	0.984441	1217.27	14.1621	1226.18	9.23258	1241.92	4.46602	1241.92	4.46602
FC-82711-2-71	77.0685	55018	1.53794	12.1453	1.73537	2.41901	2.4984	0.213081	1.79736	0.719405	1245.21	20.3521	1248.26	17.9504	1253.51	33.9438	1253.51	33.9438
FC-82711-2-19	56.7415	50333	1.87888	11.8366	3.72381	2.64045	5.29623	0.226674	3.76607	0.711086	1317.04	44.8628	1311.98	39.0241	1303.7	72.3357	1303.7	72.3357
FC-82711-2-12	69.4124	57633.9	2.85313	11.5195	2.60366	2.83922	3.6809	0.237209	2.60192	0.706871	1372.17	32.1591	1365.96	27.6469	1356.25	50.2095	1356.25	50.2095
FC-82711-2-40	100.225	113862	1.97521	11.3251	1.17898	2.90657	2.92154	0.238737	2.67309	0.914959	1380.13	33.2106	1383.62	22.0747	1389	22.6305	1389	22.6305
FC-82711-2-2	236.689	555361	1.78162	10.9074	0.471739	3.22631	1.6428	0.255227	1.57361	0.957884	1465.38	20.6263	1463.5	12.7345	1460.76	8.96656	1460.76	8.96656
FC-82711-2-83	60.2627	74024.1	1.07135	10.0787	1.24137	3.77323	3.83558	0.275813	3.62914	0.946178	1570.24	50.5776	1587.07	30.796	1609.48	23.1355	1609.48	23.1355
FC-82711-2-23	120.574	178162	2.00528	9.96171	0.672038	3.89732	1.8609	0.281578	1.73531	0.932513	1599.31	24.5783	1613.13	15.0381	1631.2	12.4887	1631.2	12.4887
FC-82711-2-34	99.7038	80122.1	1.1472	9.89353	1.22158	3.9097	1.66725	0.280539	1.13467	0.680562	1594.08	16.0246	1615.69	13.4817	1643.95	22.6656	1643.95	22.6656
FC-82711-2-32	137.673	77092.7	4.49444	9.8675	0.78104	3.94265	1.56841	0.282159	1.36011	0.867188	1602.23	19.295	1622.48	12.704	1648.84	14.4816	1648.84	14.4816
FC-82711-2-9	56.6068	47288.5	1.38308	9.73316	1.50462	4.05284	2.06283	0.286096	1.41117	0.684092	1621.99	20.2365	1644.87	16.8019	1674.21	27.8104	1674.21	27.8104
FC-82711-2-48	229.056	184246	3.49965	9.33654	0.415689	4.44237	1.09169	0.300815	1.00945	0.924667	1695.35	15.0483	1720.28	9.04827	1750.73	7.60977	1750.73	7.60977
FC-82711-2-88	324.328	153437	3.32565	9.29399	0.611707	4.29189	2.15101	0.289301	2.0622	0.958711	1638.03	29.8296	1691.81	17.7155	1759.09	11.1865	1759.09	11.1865
FC-82711-2-68	162.965	53162.7	0.929305	9.23802	0.512274	4.69192	1.86992	0.31436	1.79838	0.961742	1762.13	27.7278	1765.8	15.6523	1770.13	9.35527	1770.13	9.35527
FC-82711-2-92	74.3859	78242.9	2.76513	9.13841	0.601646	4.81158	1.97547	0.318902	1.88162	0.952494	1784.36	29.329	1786.92	16.6086	1789.9	10.9589	1789.9	10.9589
FC-82711-2-62	36.6344	39677.7	0.928377	9.11529	1.85442	4.8407	2.50733	0.32002	1.68756	0.673049	1789.83	26.374	1792	21.1032	1794.51	33.7632	1794.51	33.7632
FC-82711-2-93	131.639	252815	3.97839	9.08677	0.835604	4.84597	2.21079	0.319366	2.04679	0.925819	1786.63	31.9388	1792.92	18.6101	1800.21	15.2037	1800.21	15.2037
FC-82711-2-54	222.873	102789	0.96903	9.0204	0.436284	4.90856	1.28025	0.321128	1.20361	0.940142	1795.24	18.8599	1803.73	10.7997	1813.54	7.9232	1813.54	7.9232
FC-82711-2-61	85.8196	48379.1	4.16276	8.94404	0.887897	4.98651	2.06157	0.323467	1.86057	0.902501	1806.64	29.3146	1817.04	17.4379	1828.97	16.0967	1828.97	16.0967
FC-82711-2-7	96.9225	63657.2	2.15364	8.90878	0.810175	4.95965	1.6967	0.320456	1.49077	0.878631	1791.96	23.3225	1812.47	14.3382	1836.13	14.6765	1836.13	14.6765
FC-82711-2-55	107.127	68082.2	1.87843	8.89785	0.860313	4.98397	1.95249	0.321632	1.75274	0.897692	1797.69	27.497	1816.61	16.5137	1838.35	15.5787	1838.35	15.5787
FC-82711-2-66	93.1095	67402.2	4.27449	8.83768	0.994441	5.09461	2.1952	0.326549	1.95703	0.891506	1821.63	31.0559	1835.21	18.6345	1850.63	17.9811	1850.63	17.9811
FC-82711-2-78	51.7603	37103	0.632216	8.74176	1.1891	5.45485	2.75658	0.345844	2.48692	0.902176	1914.72	41.1976	1893.52	23.6579	1870.33	21.4484	1870.33	21.4484
FC-82711-2-31	95.0797	55838	0.929429	8.6631	0.672204	5.23834	2.88189	0.329129	2.8024	0.972417	1834.16	44.7356	1858.88	24.5763	1886.62	12.1011	1886.62	12.1011
FC-82711-2-37	178.89	9284.84	1.10723	8.48242	0.392739	5.47268	1.69329	0.336681	1.64711	0.97273	1870.68	26.7445	1896.32	14.538	1924.48	7.03741	1924.48	7.03741
FC-82711-2-3	173.449	7225.1	2.63602	7.82691	0.49608	6.60968	1.04916	0.375206	0.924467	0.88115	2053.85	16.2597	2060.64	9.25331	2067.42	8.74321	2067.42	8.74321
FC-82711-2-46	276.72	231291	1.1482	6.0102	0.256757	10.6906	1.61918	0.466004	1.59869	0.987347	2466.01	32.7598	2496.61	15.0356	2521.58	4.31337	2521.58	4.31337
FC-82711-2-30	346.133	422010	5.41974	5.82507	0.225883	11.4091	1.73751	0.482005	1.72277	0.991514	2535.99	36.1203	2557.17	16.2221	2574	3.7752	2574	3.7752
FC-82711-2-8	55.2891	64619.1	2.79211	5.5584	0.4591	12.4641	1.46768	0.502468	1.39403	0.949817	2624.39	30.0536	2640.02	13.7966	2652.01	7.61582	2652.01	7.61582
FC-82711-2-26	49.0846	52593.6	1.10061	5.49433	0.61663	12.5958	2.11413	0.501925	2.02221	0.956519	2622.06	43.5653	2649.91	19.8902	2671.22	10.2102	2671.22	10.2102
FC-82711-2-16	45.4289	46164.9	0.99439	5.40219	0.726571	13.2009	1.48929	0.517217	1.30003	0.87292	2687.37	28.5694	2694.12	14.0581	2699.18	11.9961	2699.18	11.9961
FC-82711-2-69	67.8002	73534.9	1.38949	5.30359	0.800948	13.2863	1.61189	0.511062	1.39882	0.867808	2661.16	30.4981	2700.21	15.2224	2729.56	13.1867	2729.56	13.1867
FC-82711-2-65	49.0407	53496.4	0.949411	5.30235	0.777656	13.6444	1.46649	0.524713	1.24332	0.847821	2719.14	27.5828	2725.35	13.8746	2729.94	12.8026	2729.94	12.8026
FC-82711-2-52	60.888	71743.2	6.11401	4.29379	0.238342	19.0194	1.13863	0.592293	1.1134	0.977846	2998.71	26.6985	3042.8	10.9844	3072.04	3.80877	3072.04	3.80877
Powder Wash, Tbc UMG facies, NR-81611-1A-1C. U-Pb geochronologic analyses.
							Isotope ratios						Apparent ages (Ma)
Analysis	U	206Pb	U/Th	206Pb*	±	207Pb*	±	206Pb*	±	error	206Pb*	±	207Pb*	±	206Pb*	±	Best age	±
	(ppm)	204Pb		207Pb*	(%)	235U*	(%)	238U	(%)	corr.	238U*	(Ma)	235U	(Ma)	207Pb*	(Ma)	(Ma)	(Ma)
NR-81611-1-21	387.535	7450.12	2.771	26.2616	20.0243	0.0243472	20.5282	0.00463733	4.52037	0.220203	29.8251	1.34509	24.4256	4.95434	-479.736	535.165	29.8251	1.34509
NR-81611-1-43	440.402	7103.05	1.80399	22.2563	27.495	0.0312218	27.6519	0.00503977	2.94198	0.106393	32.4068	0.951009	31.2172	8.50103	-59.3711	681.3	32.4068	0.951009
NR-81611-1-50	262.019	5765.61	1.22241	19.6211	35.7771	0.0369986	35.9695	0.00526511	3.71537	0.103292	33.852	1.25443	36.8895	13.0315	239.294	849.497	33.852	1.25443
NR-81611-1-93	402.793	6033.77	0.920941	21.2239	11.0993	0.0408049	11.4092	0.0062811	2.64101	0.231481	40.364	1.06269	40.6095	4.54182	55.1382	265.443	40.364	1.06269
NR-81611-1-80	178.679	2828	1.53672	30.9792	54.8435	0.0317734	55.2567	0.00713891	6.74517	0.12207	45.8569	3.08215	31.7602	17.2797	-939.358	1714.41	45.8569	3.08215
NR-81611-1-31	1011.37	12359.7	1.59062	21.9995	9.65981	0.0456133	10.1568	0.00727784	3.13832	0.308987	46.7461	1.46174	45.2897	4.49894	-31.1457	234.674	46.7461	1.46174
NR-81611-1-58	343.645	7528.69	1.73282	19.7062	19.8898	0.0517617	20.2046	0.00739795	3.55305	0.175853	47.5147	1.68201	51.2429	10.0969	229.257	463.415	47.5147	1.68201
NR-81611-1-89	1170.08	47190.7	2.86395	20.2701	6.07165	0.0504445	6.22984	0.00741598	1.395	0.223922	47.6301	0.66199	49.9704	3.03773	163.698	142.037	47.6301	0.66199
NR-81611-1-78	184.829	8376.51	1.45012	22.2172	54.339	0.0462594	54.7577	0.00745398	6.7585	0.123426	47.8732	3.22353	45.9169	24.5878	-55.0832	1421.99	47.8732	3.22353
NR-81611-1-82	117.474	601.339	0.82695	16.6512	55.8706	0.124156	56.5678	0.0149938	8.85411	0.156522	95.939	8.43165	118.833	63.5195	605.562	1313.32	95.939	8.43165
NR-81611-1-86	100.819	12140.4	0.84589	22.7947	18.1303	0.153716	18.3346	0.0254128	2.72919	0.148855	161.775	4.3602	145.188	24.8089	-117.974	450.11	161.775	4.3602
NR-81611-1-8	441.082	75619.7	0.99034	20.1961	3.20733	0.175894	3.40679	0.0257643	1.14859	0.337147	163.984	1.85975	164.522	5.17444	172.239	74.8722	163.984	1.85975
NR-81611-1-32	397.712	36233.5	2.67081	19.5611	3.14019	0.204804	3.28425	0.0290557	0.962019	0.292919	184.635	1.75103	189.183	5.66882	246.327	72.3486	184.635	1.75103
NR-81611-1-84	1383.68	91613.7	2.25801	19.6507	0.937102	0.23853	1.22957	0.0339953	0.796043	0.647415	215.505	1.68716	217.216	2.40448	235.819	21.6112	215.505	1.68716
NR-81611-1-71	180.219	36191.9	3.19029	18.3731	3.40315	0.455523	3.94009	0.0607002	1.98566	0.503963	379.883	7.32523	381.14	12.5213	388.761	76.4143	379.883	7.32523
NR-81611-1-38	266.185	101970	1.47746	17.8813	3.46906	0.547507	3.69181	0.0710047	1.26298	0.342103	442.206	5.39773	443.362	13.2633	449.347	77.1042	442.206	5.39773
NR-81611-1-96	84.746	21575.5	1.78516	17.3425	5.47959	0.677239	5.61983	0.085183	1.24765	0.222009	526.986	6.31338	525.104	23.0449	516.912	120.419	526.986	6.31338
NR-81611-1-28	80.839	55419.8	1.90807	14.3886	2.73513	1.52625	3.7851	0.159273	2.61649	0.691261	952.735	23.1737	940.992	23.2238	913.585	56.3198	913.585	56.3198
NR-81611-1-23	293.399	151378	2.92484	14.2046	0.9195	1.51017	2.26473	0.155579	2.06967	0.913869	932.164	17.9627	934.508	13.8355	940.022	18.827	940.022	18.827
NR-81611-1-1	138.192	88375.7	2.21532	13.9112	1.74688	1.62711	2.36557	0.164165	1.5951	0.674298	979.881	14.5001	980.743	14.8777	982.692	35.5732	982.692	35.5732
NR-81611-1-40	96.2399	134832	1.83319	13.8638	2.05887	1.59318	2.14635	0.160193	0.606543	0.282592	957.852	5.39876	967.543	13.3902	989.604	41.8821	989.604	41.8821
NR-81611-1-12	281.954	280406	1.77288	13.7543	1.06325	1.70194	1.21279	0.169778	0.583397	0.481038	1010.89	5.45833	1009.26	7.75696	1005.71	21.5714	1005.71	21.5714
NR-81611-1-27	217.537	130139	1.0774	13.6937	1.23687	1.72542	1.41423	0.171362	0.685711	0.484866	1019.61	6.46672	1018.05	9.09123	1014.66	25.0644	1014.66	25.0644
NR-81611-1-7	324.737	123096	2.50111	13.5975	0.989909	1.77392	1.88544	0.174941	1.60467	0.851085	1039.28	15.4021	1035.96	12.2434	1028.94	20.0349	1028.94	20.0349
NR-81611-1-17	142.828	127913	3.27429	13.5215	1.06233	1.77969	1.17808	0.174529	0.509245	0.432268	1037.02	4.87808	1038.06	7.65878	1040.25	21.4629	1040.25	21.4629
NR-81611-1-67	56.9045	20935.2	0.700476	13.5204	3.40582	1.87116	3.57711	0.183484	1.09367	0.305741	1085.98	10.9305	1070.94	23.6752	1040.43	68.763	1040.43	68.763
NR-81611-1-19	83.0512	31618.1	0.67625	13.5021	3.05593	1.82807	3.95592	0.179017	2.51208	0.635018	1061.6	24.5882	1055.59	25.9701	1043.15	61.6699	1043.15	61.6699
NR-81611-1-57	205.415	352010	4.48498	13.5008	1.17154	1.7341	1.94794	0.169797	1.55626	0.798929	1011	14.562	1021.27	12.5455	1043.35	23.6551	1043.35	23.6551
NR-81611-1-87	313.314	198342	2.86269	13.4248	0.471097	1.80793	1.66928	0.176031	1.60142	0.959351	1045.26	15.4524	1048.33	10.9137	1054.76	9.4886	1054.76	9.4886
NR-81611-1-34	108.403	69447.8	1.51666	13.3779	1.69823	1.85433	2.3377	0.179918	1.60652	0.687219	1066.53	15.7916	1064.97	15.4218	1061.81	34.1816	1061.81	34.1816
NR-81611-1-48	65.9342	40977.8	1.34486	13.3672	3.0317	1.76444	3.45555	0.171059	1.65821	0.479867	1017.94	15.6144	1032.48	22.3984	1063.42	60.9991	1063.42	60.9991
NR-81611-1-77	189.228	94771.1	1.59728	13.3254	0.953987	1.81399	1.42011	0.175312	1.05196	0.740761	1041.31	10.1153	1050.52	9.29558	1069.72	19.1621	1069.72	19.1621
NR-81611-1-74	99.2741	32037.7	6.25956	13.2878	1.41149	1.91527	3.01129	0.18458	2.66	0.883341	1091.95	26.7191	1086.42	20.0905	1075.39	28.3416	1075.39	28.3416
NR-81611-1-37	48.8812	33656.9	1.97876	13.1319	4.40866	1.8731	4.50883	0.178397	0.945136	0.209619	1058.21	9.22376	1071.63	29.8559	1099.03	88.267	1099.03	88.267
NR-81611-1-30	117.286	83905.3	0.827037	13.1182	0.924245	1.96188	1.49354	0.186657	1.17322	0.785527	1103.24	11.8964	1102.53	10.0454	1101.1	18.4993	1101.1	18.4993
NR-81611-1-60	161.389	330229	1.34137	13.1046	0.933817	1.91866	1.77277	0.182356	1.50688	0.850016	1079.83	14.982	1087.6	11.8336	1103.18	18.6637	1103.18	18.6637
NR-81611-1-9	15.4127	10603.7	3.90884	13.0196	8.9616	1.97294	10.1697	0.186298	4.80755	0.472732	1101.29	48.6703	1106.31	68.6319	1116.21	179.184	1116.21	179.184
NR-81611-1-64	105.848	55762.6	0.932032	12.9607	2.05196	1.92106	2.19283	0.180579	0.773272	0.352637	1070.14	7.62471	1088.44	14.6442	1125.22	40.8815	1125.22	40.8815
NR-81611-1-4	38.699	13444.9	1.02574	12.9148	2.2304	2.0968	2.67263	0.196401	1.47251	0.550957	1155.96	15.5827	1147.76	18.3764	1132.29	44.4175	1132.29	44.4175
NR-81611-1-2	63.5844	31773.4	3.36218	12.7699	2.72131	2.14039	3.03064	0.198234	1.33388	0.44013	1165.83	14.2256	1161.95	20.9766	1154.71	54.0111	1154.71	54.0111
NR-81611-1-88	246.758	226792	6.19243	12.7673	0.478996	2.15075	1.22329	0.199154	1.12561	0.920151	1170.77	12.051	1165.29	8.47903	1155.11	9.48606	1155.11	9.48606
NR-81611-1-53	95.496	35239.4	2.0048	12.67	1.71711	2.11933	1.99022	0.194748	1.00624	0.505591	1147.04	10.5734	1155.12	13.7308	1170.28	33.9806	1170.28	33.9806
NR-81611-1-90	184.521	145120	3.70345	12.6668	0.500844	2.17165	0.803453	0.199507	0.628246	0.781932	1172.67	6.73601	1172.01	5.58598	1170.81	9.93298	1170.81	9.93298
NR-81611-1-68	134.73	57562.4	1.55952	12.6039	0.806088	2.18164	1.27001	0.199428	0.981407	0.772753	1172.24	10.5191	1175.2	8.84263	1180.67	15.9353	1180.67	15.9353
NR-81611-1-100	126.771	79609.5	2.18874	12.5952	1.80659	2.16517	2.20686	0.197787	1.26747	0.574329	1163.42	13.4919	1169.93	15.3297	1182.02	35.7023	1182.02	35.7023
NR-81611-1-76	45.5358	21237	1.89123	12.4987	4.61895	2.15777	4.92706	0.1956	1.71499	0.348076	1151.64	18.0869	1167.55	34.1984	1197.2	91.1329	1197.2	91.1329
NR-81611-1-18	62.7613	39229.9	1.80783	12.497	2.80909	2.17648	3.14898	0.197269	1.42307	0.451914	1160.63	15.1151	1173.55	21.9117	1197.49	55.3899	1197.49	55.3899
NR-81611-1-16	80.7893	65697.5	1.60389	12.3893	1.38957	2.27067	1.85055	0.204032	1.22214	0.66042	1196.95	13.3506	1203.22	13.0459	1214.49	27.337	1214.49	27.337
NR-81611-1-62	196.673	98275	2.48172	12.3397	0.776466	2.32662	1.00783	0.208223	0.642509	0.637519	1219.35	7.13806	1220.45	7.15725	1222.38	15.2583	1222.38	15.2583
NR-81611-1-20	105.292	67178.7	2.35165	12.0949	1.78998	2.40915	2.037	0.211332	0.972287	0.477313	1235.91	10.9349	1245.33	14.6174	1261.68	34.9784	1261.68	34.9784
NR-81611-1-33	164.272	117945	1.34281	12.0892	0.972109	2.40004	1.30137	0.210433	0.865191	0.664833	1231.12	9.69624	1242.61	9.32772	1262.6	18.9834	1262.6	18.9834
NR-81611-1-83	96.2119	142508	2.5013	11.9483	1.52827	2.55039	1.66819	0.22101	0.668761	0.40089	1287.21	7.80336	1286.55	12.1682	1285.43	29.7447	1285.43	29.7447
NR-81611-1-35	70.654	62684.6	1.04438	11.9053	1.54598	2.52782	2.44594	0.218265	1.89541	0.774921	1272.7	21.891	1280.07	17.7976	1292.45	30.0594	1292.45	30.0594
NR-81611-1-79	115.132	57328.2	1.13184	11.6994	0.831218	2.70066	1.49868	0.229157	1.24704	0.832095	1330.08	14.9874	1328.64	11.1057	1326.3	16.0943	1326.3	16.0943
NR-81611-1-61	86.0195	71477.5	2.59984	11.4625	2.16038	2.82773	2.32452	0.23508	0.857987	0.369103	1361.07	10.5274	1362.92	17.4382	1365.81	41.6042	1365.81	41.6042
NR-81611-1-54	87.4836	37504.3	2.2896	11.4198	1.28265	2.80631	1.44523	0.232431	0.665954	0.460795	1347.23	8.09643	1357.22	10.8197	1372.99	24.6742	1372.99	24.6742
NR-81611-1-22	71.9149	60609.5	2.39734	11.3111	1.60962	2.9108	1.79497	0.238791	0.794397	0.442568	1380.41	9.87134	1384.72	13.5663	1391.36	30.8869	1391.36	30.8869
NR-81611-1-6	50.2247	30773.8	1.77758	11.2919	2.31716	3.10643	2.98695	0.254406	1.88484	0.631026	1461.16	24.6425	1434.28	22.9472	1394.63	44.4465	1394.63	44.4465
NR-81611-1-42	74.032	101608	1.85008	11.2845	0.768642	2.92545	2.22904	0.239427	2.09232	0.938665	1383.72	26.0556	1388.52	16.869	1395.88	14.739	1395.88	14.739
NR-81611-1-99	147.05	86606.1	1.34796	11.186	0.885785	2.72684	1.65114	0.221225	1.39343	0.84392	1288.34	16.272	1335.8	12.2674	1412.67	16.9466	1412.67	16.9466
NR-81611-1-55	59.3419	36275.1	1.31994	11.1354	1.8341	2.96207	3.56785	0.239221	3.06033	0.857752	1382.65	38.0839	1397.95	27.0902	1421.34	35.0505	1421.34	35.0505
NR-81611-1-3	37.423	20883.6	1.0835	11.0661	2.1105	2.86746	3.46048	0.23014	2.7424	0.79249	1335.23	33.0742	1373.41	26.0576	1433.26	40.2685	1433.26	40.2685
NR-81611-1-49	133.853	125978	3.0577	11.0652	1.4159	3.06371	1.60578	0.24587	0.757463	0.471712	1417.14	9.63635	1423.66	12.2931	1433.42	27.0133	1433.42	27.0133
NR-81611-1-39	130.402	90437.1	1.34857	11.0289	1.08883	3.07564	1.27582	0.246019	0.664973	0.52121	1417.91	8.46381	1426.64	9.77629	1439.68	20.7552	1439.68	20.7552
NR-81611-1-26	152.715	109046	0.970491	11.0248	0.815786	3.06072	1.22005	0.244732	0.907204	0.743578	1411.25	11.4984	1422.92	9.33771	1440.4	15.5488	1440.4	15.5488
NR-81611-1-70	285.556	277299	2.60986	10.8961	0.406204	3.27384	0.857965	0.258718	0.755713	0.880821	1483.28	10.0132	1474.86	6.67337	1462.73	7.71885	1462.73	7.71885
NR-81611-1-44	136.858	113527	0.634973	10.8895	0.717301	3.25407	0.998088	0.257001	0.694018	0.695347	1474.48	9.14721	1470.15	7.75228	1463.88	13.6285	1463.88	13.6285
NR-81611-1-52	192.51	198643	3.61177	10.6795	0.541866	3.34427	1.62432	0.259031	1.53127	0.942716	1484.88	20.3089	1491.45	12.6972	1500.79	10.2444	1500.79	10.2444
NR-81611-1-65	126.885	38476.7	0.839384	10.5492	1.29348	3.55937	2.09142	0.272327	1.64345	0.785806	1552.6	22.6761	1540.52	16.5797	1523.97	24.3786	1523.97	24.3786
NR-81611-1-24	63.3309	162151	1.13524	10.5083	1.65225	3.42483	2.14288	0.261018	1.36454	0.636781	1495.05	18.2077	1510.11	16.8426	1531.28	31.1115	1531.28	31.1115
NR-81611-1-59	80.4693	165563	1.02006	10.3774	1.78438	3.50634	1.93098	0.263901	0.738002	0.382191	1509.77	9.93353	1528.64	15.257	1554.85	33.4957	1554.85	33.4957
NR-81611-1-14	81.4053	127568	0.903988	9.88268	1.3071	4.0876	1.70532	0.292983	1.09526	0.642264	1656.42	15.9988	1651.83	13.9129	1645.99	24.2463	1645.99	24.2463
NR-81611-1-45	196.75	206234	1.11805	9.83319	0.675302	4.05854	1.06232	0.289443	0.820053	0.771947	1638.75	11.8665	1646.02	8.65445	1655.29	12.5105	1655.29	12.5105
NR-81611-1-15	343.017	230649	1.41125	9.61791	0.324833	4.3067	1.08051	0.300417	1.03052	0.953741	1693.37	15.3468	1694.64	8.90408	1696.2	5.98729	1696.2	5.98729
NR-81611-1-11	235.95	281745	3.50171	9.4958	0.305542	4.49268	3.30834	0.309411	3.2942	0.995726	1737.81	50.1807	1729.62	27.4832	1719.71	5.6151	1719.71	5.6151
NR-81611-1-81	164.72	255810	1.84693	9.41266	0.564543	4.29187	1.19316	0.292993	1.05115	0.880983	1656.47	15.3549	1691.8	9.82608	1735.86	10.3521	1735.86	10.3521
NR-81611-1-66	220.713	112984	1.97577	9.40488	0.418769	4.21752	1.66027	0.28768	1.60659	0.967668	1629.92	23.1381	1677.44	13.6279	1737.37	7.67711	1737.37	7.67711
NR-81611-1-63	217.011	317336	2.08077	9.40102	0.333174	4.50815	0.62635	0.307378	0.530387	0.846789	1727.79	8.03863	1732.48	5.20527	1738.13	6.10697	1738.13	6.10697
NR-81611-1-97	199.406	200292	1.91329	9.36906	0.464821	4.41795	0.998874	0.300203	0.884133	0.885129	1692.32	13.1595	1715.71	8.27058	1744.36	8.51416	1744.36	8.51416
NR-81611-1-92	68.5609	95001.3	1.98778	9.3613	0.647681	4.57942	1.61815	0.310918	1.48288	0.916402	1745.22	22.6723	1745.53	13.4864	1745.88	11.8621	1745.88	11.8621
NR-81611-1-98	421.55	261898	8.66192	9.2867	0.339103	4.60542	2.45691	0.310191	2.43339	0.990429	1741.65	37.1389	1750.25	20.4993	1760.52	6.20017	1760.52	6.20017
NR-81611-1-85	187.562	15865.3	1.6742	9.27229	2.85222	4.58625	4.53107	0.308421	3.52072	0.777016	1732.93	53.5002	1746.77	37.7893	1763.36	52.1388	1763.36	52.1388
NR-81611-1-10	109.861	141876	2.14838	9.22244	0.575935	4.81198	0.870347	0.321861	0.652535	0.749742	1798.81	10.2425	1786.99	7.31694	1773.21	10.5121	1773.21	10.5121
NR-81611-1-51	48.0944	62861.2	2.1226	9.14527	1.30095	4.78028	1.54288	0.317065	0.82946	0.537606	1775.38	12.8723	1781.44	12.9566	1788.53	23.7034	1788.53	23.7034
NR-81611-1-73	348.168	337136	1.90703	9.13972	0.260433	4.88113	0.912348	0.323558	0.874388	0.958393	1807.08	13.7795	1799	7.6888	1789.64	4.74466	1789.64	4.74466
NR-81611-1-5	27.7281	16109.9	0.75325	8.94941	2.66487	5.05596	3.22523	0.328168	1.81676	0.563297	1829.5	28.9376	1828.75	27.3474	1827.88	48.3274	1827.88	48.3274
NR-81611-1-21	52.6436	60266.5	1.23767	8.90245	0.983829	5.0928	1.79324	0.328825	1.49926	0.836064	1832.68	23.9164	1834.91	15.2209	1837.41	17.8177	1837.41	17.8177
NR-81611-1-13	56.0805	74569.1	1.34849	8.88786	1.44246	5.05123	1.855	0.325606	1.16633	0.628751	1817.05	18.468	1827.95	15.724	1840.38	26.1142	1840.38	26.1142
NR-81611-1-91	71.7235	57580.8	3.16327	8.77444	0.67664	5.33501	1.34974	0.339511	1.16789	0.865267	1884.31	19.0822	1874.49	11.5422	1863.6	12.2148	1863.6	12.2148
NR-81611-1-56	131.64	115203	1.63452	8.40937	0.499713	5.80061	1.77986	0.353782	1.70827	0.959778	1952.63	28.7782	1946.5	15.4161	1939.97	8.94049	1939.97	8.94049
NR-81611-1-69	96.4768	149195	1.3336	7.05093	0.754584	8.07288	1.49033	0.412832	1.28518	0.862346	2227.86	24.2085	2239.21	13.4655	2249.6	13.0374	2249.6	13.0374
NR-81611-1-36	40.2185	85104.9	1.38935	6.89424	1.08886	8.24615	2.71263	0.412322	2.4845	0.915901	2225.53	46.7593	2258.42	24.5695	2288.34	18.733	2288.34	18.733
NR-81611-1-46	115.773	75847	2.42794	5.95165	0.543105	10.7235	1.14896	0.462884	1.01249	0.881226	2452.28	20.6525	2499.46	10.6716	2538.01	9.10895	2538.01	9.10895
NR-81611-1-47	21.2817	53386.6	1.47365	5.36572	1.00115	13.225	1.31034	0.514663	0.845393	0.645172	2676.5	18.5176	2695.84	12.3702	2710.36	16.5168	2710.36	16.5168
NR-81611-1-41	115.534	190411	1.74481	5.3207	0.421773	12.9289	3.22377	0.498919	3.19606	0.991405	2609.15	68.5806	2674.49	30.3926	2724.25	6.94905	2724.25	6.94905
NR-81611-1-29	259.111	474981	1.30594	5.02546	0.222011	14.2993	1.23064	0.521182	1.21045	0.983593	2704.19	26.7346	2769.77	11.6794	2817.89	3.62662	2817.89	3.62662
South Baxter, Tbc FC facies, SB-7-9-12-1. U-Pb geochronologic analyses.
							Isotope ratios						Apparent ages (Ma)
Analysis	U	206Pb	U/Th	206Pb*	±	207Pb*	±	206Pb*	±	error	206Pb*	±	207Pb*	±	206Pb*	±	Best age	±
	(ppm)	204Pb		207Pb*	(%)	235U*	(%)	238U	(%)	corr.	238U*	(Ma)	235U	(Ma)	207Pb*	(Ma)	(Ma)	(Ma)
SB79121-98	41.7467	1177.04	0.592814	4.914	127.201	0.134584	132.013	0.00479653	35.3187	0.267539	30.8465	10.8686	128.208	160.321	2854.46	708.162	30.8465	10.8686
SB79121-3	170.342	2600.88	1.15032	24.2436	34.0533	0.0276725	34.5924	0.00486569	6.08343	0.17586	31.2902	1.8989	27.7165	9.4584	-272.222	887.283	31.2902	1.8989
SB79121-38	201.797	6112.79	1.47505	31.3956	62.6627	0.0221801	63.3144	0.00505046	9.06089	0.14311	32.4754	2.93516	22.2752	13.9507	-978.582	2026.02	32.4754	2.93516
SB79121-76	332.21	10833	1.66834	26.1092	29.5016	0.0268098	30.0278	0.00507674	5.59695	0.186392	32.644	1.82245	26.8637	7.96097	-464.333	793.776	32.644	1.82245
SB79121-14	650.826	16970.9	0.693937	24.9147	12.0843	0.0283024	12.2564	0.0051142	2.04684	0.167001	32.8843	0.671373	28.3386	3.4253	-342.116	312.414	32.8843	0.671373
SB79121-55	714.984	8903.11	2.52147	20.8436	10.5252	0.0341561	11.0541	0.00516344	3.37837	0.305622	33.2	1.11874	34.1023	3.70711	98.1279	249.638	33.2	1.11874
SB79121-71	2519.08	46608.5	2.35479	20.9885	2.39654	0.0350155	2.57331	0.00533016	0.93728	0.364232	34.2692	0.320346	34.9458	0.883964	81.6604	56.8695	34.2692	0.320346
SB79121-28	80.9086	2793.58	0.692361	8.07185	38.4915	0.0925401	42.7368	0.00541753	18.5698	0.434516	34.8294	6.45033	89.8668	36.7717	2012.94	711.891	34.8294	6.45033
SB79121-104	175.944	4012.73	1.20948	19.2476	36.2284	0.0410305	36.6129	0.00572772	5.29268	0.144558	36.8179	1.9431	40.8297	14.6534	283.432	854.211	36.8179	1.9431
SB79121-56	169.8	2765.73	2.23888	17.9891	34.4774	0.0445164	35.5543	0.00580802	8.68448	0.244259	37.3326	3.23277	44.224	15.3872	435.98	789.299	37.3326	3.23277
SB79121-22	311.36	6654.67	0.740037	20.0846	22.5779	0.0428841	22.8397	0.00624682	3.44828	0.150977	40.1443	1.37999	42.636	9.53662	185.149	531.628	40.1443	1.37999
SB79121-12	243.666	7089.41	0.914511	33.0436	56.1258	0.0262095	56.84	0.00628124	8.98221	0.158026	40.3648	3.61433	26.2699	14.7414	NA	NA	40.3648	3.61433
SB79121-8	337.724	13669.8	0.76156	24.4198	20.0462	0.0355768	20.4773	0.00630099	4.17998	0.204127	40.4913	1.68722	35.4964	7.14324	-290.669	515.631	40.4913	1.68722
SB79121-94	221.449	6247.77	1.19318	27.8759	78.6305	0.0315976	78.7652	0.00638824	4.60338	0.0584444	41.0503	1.8837	31.5872	24.5015	-640.555	2577.02	41.0503	1.8837
SB79121-13	393.085	9158.43	4.74958	21.9182	11.6108	0.0402864	12.1694	0.00640416	3.64497	0.299518	41.1522	1.49521	40.1036	4.7853	-22.1816	281.828	41.1522	1.49521
SB79121-79	210.287	7362.08	1.31253	26.4093	58.8766	0.0337395	59.2728	0.00646239	6.8419	0.115431	41.5252	2.83198	33.6932	19.6457	-494.626	1700.16	41.5252	2.83198
SB79121-86	141.6	2167.48	0.649481	18.3386	60.1589	0.0502794	60.6305	0.00668736	7.5477	0.124487	42.966	3.23216	49.8108	29.48	392.97	1486.98	42.966	3.23216
SB79121-78	115.606	3396.79	0.655709	23.5728	35.1233	0.0420519	37.1556	0.00718943	12.1201	0.326197	46.1802	5.57708	41.8254	15.2259	-201.403	904.118	46.1802	5.57708
SB79121-100	109.246	3042.61	1.28099	16.0755	25.1933	0.062277	26.3512	0.00726089	7.72555	0.293177	46.6376	3.59001	61.3441	15.6875	681.198	546.231	46.6376	3.59001
SB79121-60	392.575	12398.1	1.54714	22.3429	23.7376	0.0448162	23.9224	0.00726227	2.96728	0.124038	46.6464	1.37914	44.5154	10.4194	-68.8363	586.763	46.6464	1.37914
SB79121-61	348.062	9867.45	2.32776	18.8694	15.3914	0.0531753	16.1742	0.00727724	4.97087	0.307333	46.7422	2.31509	52.6066	8.29225	328.64	351.059	46.7422	2.31509
SB79121-29	371.546	14223.3	0.897363	24.7998	20.3808	0.0408001	20.7697	0.0073385	4.00066	0.19262	47.1343	1.87881	40.6049	8.26731	-330.213	528.559	47.1343	1.87881
SB79121-53	374.071	7863.87	1.42483	22.5335	20.4978	0.0455591	20.5609	0.00744564	1.60997	0.0783026	47.8199	0.767039	45.2371	9.09725	-89.6291	507.1	47.8199	0.767039
SB79121-97	194.951	6714.44	1.34251	21.793	22.1285	0.0476078	22.7559	0.0075248	5.30676	0.233203	48.3264	2.55497	47.2248	10.5007	-8.3354	539.842	48.3264	2.55497
SB79121-51	1203.86	19999.4	1.40702	20.8046	5.17761	0.0499636	6.61572	0.00753894	4.11827	0.622497	48.4169	1.98647	49.5055	3.1966	102.516	122.469	48.4169	1.98647
SB79121-21	98.0849	2439.97	0.959797	12.0842	113.073	0.0879761	113.652	0.00771048	11.461	0.100843	49.5143	5.65311	85.6163	93.5792	1263.4	213.835	49.5143	5.65311
SB79121-35	155.036	4572.12	1.40568	20.7067	35.9493	0.0513831	37.418	0.00771668	10.3805	0.27742	49.5539	5.12422	50.8773	18.5703	113.657	873.338	49.5539	5.12422
SB79121-70	432.771	20800.7	2.05595	21.2067	12.5492	0.0504477	12.8239	0.00775912	2.64053	0.205906	49.8255	1.31058	49.9735	6.25351	57.0588	300.223	49.8255	1.31058
SB79121-65	320.571	24026.1	1.59376	22.0687	17.5269	0.0492002	17.8338	0.00787485	3.29412	0.184712	50.5657	1.65918	48.767	8.49166	-38.7707	428.36	50.5657	1.65918
SB79121-36	40.8476	1735.18	0.786456	11.8862	104.859	0.0986666	110.713	0.00850575	35.5246	0.32087	54.5997	19.3145	95.5448	101.291	1295.57	141.685	54.5997	19.3145
SB79121-84	739.945	7137.75	1.39745	19.656	4.59484	0.0966939	5.59313	0.0137846	3.18913	0.570187	88.2542	2.79536	93.72	5.00728	235.194	106.057	88.2542	2.79536
SB79121-90	183.975	8606.56	1.83707	20.9326	12.8814	0.0984858	13.9026	0.0149519	5.22981	0.376175	95.6726	4.96655	95.3776	12.6569	88.0301	306.452	95.6726	4.96655
SB79121-62	181.95	14591.2	1.24103	23.0313	22.6061	0.0934559	22.7205	0.0156108	2.27697	0.100216	99.8562	2.25618	90.7176	19.7201	-143.498	566.221	99.8562	2.25618
SB79121-37	383.753	16876.2	1.47561	20.348	8.96166	0.106121	10.1722	0.0156612	4.8127	0.473123	100.176	4.7839	102.411	9.90965	154.768	210.187	100.176	4.7839
SB79121-52	269.39	14463.8	0.735403	21.7593	20.915	0.0998799	20.967	0.0157624	1.47497	0.0703473	100.818	1.47547	96.6655	19.3353	-4.59218	509.31	100.818	1.47547
SB79121-68	179.93	8751.93	1.86475	24.1639	15.722	0.0905437	16.2803	0.0158681	4.22687	0.25963	101.489	4.25622	88.0097	13.7257	-263.868	400.975	101.489	4.25622
SB79121-82	500.585	19405	2.83833	20.3313	5.45824	0.112097	5.91093	0.0165294	2.26864	0.383804	105.684	2.37805	107.882	6.0498	156.671	127.843	105.684	2.37805
SB79121-69	111.701	5161.24	2.10008	26.075	27.0603	0.0997216	27.4155	0.0188587	4.39856	0.160441	120.439	5.24841	96.5193	25.2477	-460.875	725.451	120.439	5.24841
SB79121-105	738.233	58748.7	0.739679	20.5409	1.57284	0.170095	2.22674	0.0253402	1.57624	0.707868	161.318	2.51121	159.502	3.28679	132.587	36.9711	161.318	2.51121
SB79121-59	302.928	30395.5	3.37238	12.6446	2.80258	0.366567	4.76277	0.033617	3.85092	0.808545	213.146	8.07387	317.106	12.9729	1174.28	55.4664	213.146	8.07387
SB79121-83	186.706	51854.6	1.14414	19.2405	5.83492	0.268887	6.45161	0.0375218	2.75265	0.426661	237.454	6.41736	241.803	13.8826	284.245	133.53	237.454	6.41736
SB79121-63	1112	88129.5	2.22415	19.2118	1.20614	0.321942	5.50244	0.0448584	5.36862	0.97568	282.877	14.8583	283.395	13.6074	287.69	27.5647	282.877	14.8583
SB79121-42	83.878	25525.9	0.519531	18.6459	7.44224	0.515718	7.52957	0.0697421	1.14343	0.151858	434.602	4.80555	422.287	26.0189	355.609	168.263	434.602	4.80555
SB79121-74	285.932	267148	2.61404	13.9765	0.449515	1.62482	1.12134	0.164704	1.0273	0.916134	982.863	9.36488	979.857	7.04822	973.147	9.16624	973.147	9.16624
SB79121-1	48.7509	30996.7	2.03547	13.8069	4.23111	1.66381	4.31438	0.16661	0.843532	0.195516	993.405	7.76595	994.83	27.3687	997.953	85.9937	997.953	85.9937
SB79121-27	207.458	79428.1	2.56902	13.717	0.968877	1.73086	1.13855	0.172195	0.597968	0.525203	1024.19	5.66262	1020.07	7.32741	1011.21	19.6295	1011.21	19.6295
SB79121-93	83.4407	145244	1.4581	13.7044	1.5564	1.73956	1.76365	0.172901	0.829521	0.470342	1028.08	7.88283	1023.3	11.3715	1013.08	31.5271	1013.08	31.5271
SB79121-24	18.7386	8192.51	1.387	13.3638	6.99043	1.84322	7.1994	0.178651	1.72202	0.239189	1059.6	16.8259	1061.01	47.4251	1063.93	140.77	1063.93	140.77
SB79121-7	69.0481	126754	1.70221	13.2808	1.46226	1.89319	2.87163	0.182354	2.47144	0.860643	1079.82	24.572	1078.7	19.0821	1076.45	29.3566	1076.45	29.3566
SB79121-50	77.1167	39754.3	2.57354	13.2025	2.95353	1.98134	3.13556	0.18972	1.05281	0.335763	1119.86	10.8227	1109.18	21.162	1088.29	59.2108	1088.29	59.2108
SB79121-43	178.842	117263	1.17024	13.1148	1.2004	1.92563	1.659	0.183161	1.14514	0.690255	1084.22	11.4278	1090.02	11.0879	1101.66	24.0092	1101.66	24.0092
SB79121-5	94.2756	119237	1.81884	13.0729	1.94808	1.89369	2.21868	0.179547	1.06186	0.478599	1064.5	10.4195	1078.88	14.7439	1108.01	38.9104	1108.01	38.9104
SB79121-26	140.786	3844.82	2.56812	13.0424	1.18937	1.75886	2.36718	0.166375	2.04669	0.86461	992.109	18.8201	1030.43	15.3248	1112.67	23.7675	1112.67	23.7675
SB79121-2	147.285	126452	1.78207	12.9585	0.485256	1.98898	1.06879	0.186932	0.952278	0.890989	1104.74	9.6681	1111.77	7.22164	1125.54	9.65271	1125.54	9.65271
SB79121-33	98.8254	60186.8	1.23668	12.795	2.13764	2.10672	3.25229	0.1955	2.4511	0.753654	1151.1	25.8392	1151.01	22.3973	1150.84	42.4584	1150.84	42.4584
SB79121-40	51.2012	22464.1	0.936376	12.7241	3.47496	2.16941	3.77712	0.200202	1.48031	0.391914	1176.41	15.9179	1171.29	26.2574	1161.83	68.9055	1161.83	68.9055
SB79121-85	55.1848	23557.2	1.24177	12.7056	3.03991	2.17508	3.21989	0.200433	1.06145	0.329652	1177.64	11.4248	1173.1	22.4007	1164.72	60.2492	1164.72	60.2492
SB79121-72	126.439	70782.1	3.16582	12.2184	0.820454	2.39572	1.56994	0.2123	1.3385	0.852578	1241.06	15.1104	1241.32	11.247	1241.8	16.096	1241.8	16.096
SB79121-46	159.919	166215	1.9528	11.4423	0.584131	2.8453	0.80466	0.236124	0.553415	0.687763	1366.52	6.81471	1367.57	6.04568	1369.2	11.2431	1369.2	11.2431
SB79121-103	225.929	344726	1.03308	11.2184	0.557807	2.97387	1.90152	0.241963	1.81787	0.956006	1396.9	22.8309	1400.96	14.45	1407.14	10.6797	1407.14	10.6797
SB79121-17	266.733	586308	3.14438	11.0556	0.455994	3.23375	3.76159	0.259291	3.73385	0.992625	1486.22	49.5617	1465.29	29.1812	1435.07	8.6974	1435.07	8.6974
SB79121-11	104.887	104290	2.05885	11.0111	1.07368	3.27183	1.63271	0.261288	1.23002	0.753363	1496.43	16.4262	1474.38	12.6981	1442.77	20.458	1442.77	20.458
SB79121-101	141.576	31989.2	0.729701	10.8465	1.02335	3.01595	2.35547	0.237253	2.12155	0.900693	1372.4	26.2257	1411.66	17.9634	1471.41	19.4239	1471.41	19.4239
SB79121-75	250.772	23802.4	2.65904	10.7074	3.37175	2.99162	4.29261	0.232322	2.65665	0.618889	1346.66	32.2865	1405.49	32.6782	1495.85	63.804	1495.85	63.804
SB79121-99	110.656	94402.6	0.913563	10.7037	0.78702	3.54425	1.59626	0.275142	1.38876	0.870006	1566.85	19.3172	1537.15	12.6421	1496.51	14.8879	1496.51	14.8879
SB79121-25	104.147	86446.6	0.858571	10.6664	0.832152	3.37482	3.04801	0.261076	2.93221	0.96201	1495.34	39.1331	1498.57	23.879	1503.12	15.7263	1503.12	15.7263
SB79121-45	30.7281	48475.9	0.538613	9.99896	1.81077	3.88345	3.21761	0.281625	2.65972	0.826614	1599.54	37.6764	1610.25	25.9866	1624.26	33.6853	1624.26	33.6853
SB79121-44	102.365	74361.7	1.56409	9.94843	1.08842	3.85166	1.84476	0.277908	1.48945	0.807397	1580.82	20.8808	1603.61	14.8716	1633.68	20.2214	1633.68	20.2214
SB79121-96	73.4188	69783.6	1.0208	9.84135	0.820959	4.16884	1.79794	0.297556	1.59957	0.889666	1679.18	23.6464	1667.92	14.7251	1653.76	15.2123	1653.76	15.2123
SB79121-34	273.199	277256	1.83008	9.11872	0.270751	4.88465	0.668721	0.323048	0.611459	0.91437	1804.6	9.62447	1799.61	5.63628	1793.83	4.93009	1793.83	4.93009
SB79121-73	38.0881	52355.4	0.964377	8.87803	1.19101	5.01117	2.48738	0.322667	2.1837	0.877912	1802.74	34.3415	1821.21	21.0579	1842.39	21.5576	1842.39	21.5576
SB79121-39	87.036	85886.5	1.08613	8.86217	0.95622	5.2843	1.9775	0.339646	1.73094	0.875317	1884.97	28.2904	1866.33	16.8856	1845.62	17.3004	1845.62	17.3004
SB79121-77	117.802	136083	6.26751	8.79118	0.594149	5.32451	2.83123	0.339489	2.76819	0.977732	1884.21	45.228	1872.81	24.207	1860.16	10.7299	1860.16	10.7299
SB79121-92	122.366	221135	2.81654	8.78918	0.483506	5.29465	0.863916	0.337508	0.715941	0.828717	1874.67	11.6462	1868	7.37861	1860.57	8.73097	1860.57	8.73097
SB79121-49	25.5029	32371.5	0.869056	8.72472	2.58189	5.20683	3.20783	0.329476	1.90368	0.593449	1835.84	30.413	1853.73	27.3306	1873.85	46.5621	1873.85	46.5621
SB79121-66	143.578	22259.3	1.09599	8.58119	0.622846	4.97491	3.93619	0.309622	3.8866	0.987401	1738.85	59.2361	1815.07	33.2901	1903.71	11.1915	1903.71	11.1915
SB79121-18	109.886	158549	3.13166	8.51289	0.657489	5.66295	4.94662	0.349638	4.90273	0.991127	1932.87	81.8805	1925.74	42.714	1918.05	11.7918	1918.05	11.7918
SB79121-81	75.9155	111479	2.05576	6.50591	0.557068	9.00674	1.91189	0.424986	1.82894	0.95661	2283.07	35.1629	2338.69	17.4748	2387.56	9.48332	2387.56	9.48332
SB79121-48	337.723	869477	4.97697	5.64954	0.14938	11.9512	1.18565	0.489692	1.17621	0.992032	2569.34	24.9247	2600.59	11.1098	2625	2.48432	2625	2.48432
SB79121-58	341.122	601366	0.991821	5.64082	0.136246	11.6014	3.79496	0.474627	3.79251	0.999355	2503.82	78.6932	2572.79	35.4899	2627.57	2.26533	2627.57	2.26533
SB79121-95	134.39	297570	0.931655	5.60946	0.226145	12.4361	1.16095	0.505944	1.13871	0.980844	2639.29	24.662	2637.91	10.9112	2636.83	3.75667	2636.83	3.75667
SB79121-23	230.93	56132.8	0.535528	5.60583	0.178337	12.2981	1.49349	0.500006	1.4828	0.992845	2613.82	31.863	2627.42	14.0252	2637.91	2.96219	2637.91	2.96219
SB79121-102	344.341	705218	2.47838	5.60428	0.102066	12.9832	3.25404	0.527716	3.25244	0.999508	2731.82	72.4275	2678.44	30.6874	2638.37	1.69525	2638.37	1.69525
SB79121-31	165.997	446823	1.80057	5.60194	0.217672	12.6395	2.42973	0.51353	2.41996	0.995979	2671.68	52.9311	2653.16	22.8661	2639.06	3.61194	2639.06	3.61194
SB79121-89	284.57	376080	0.883159	5.57988	0.15677	11.5007	6.25061	0.465424	6.24864	0.999685	2463.46	127.952	2564.64	58.455	2645.61	2.60218	2645.61	2.60218
SB79121-54	151.349	191333	0.450027	5.56726	0.199937	12.2879	2.68778	0.496156	2.68034	0.997229	2597.25	57.3007	2626.65	25.2426	2649.36	3.31751	2649.36	3.31751
SB79121-47	157.002	425526	1.87964	5.55879	0.130038	12.5519	1.10129	0.506043	1.09359	0.993004	2639.72	23.6878	2646.62	10.3576	2651.89	2.15715	2651.89	2.15715
SB79121-57	43.8048	85643.8	1.26245	5.47177	0.781755	13.0564	2.07458	0.518143	1.92165	0.926284	2691.3	42.28	2683.74	19.5687	2678.03	12.9328	2678.03	12.9328
SB79121-9	45.097	123646	0.509952	5.31964	0.671215	13.9037	1.25523	0.536428	1.0607	0.845021	2768.48	23.8732	2743.17	11.8908	2724.58	11.0551	2724.58	11.0551
SB79121-10	41.2126	44246.6	1.5566	5.2925	0.622385	13.8158	1.0609	0.530318	0.859148	0.809833	2742.79	19.193	2737.16	10.0454	2733.01	10.2428	2733.01	10.2428
SB79121-80	105.437	207037	2.80126	5.17426	0.685392	14.2944	2.24204	0.53643	2.13471	0.952128	2768.49	48.0469	2769.44	21.2799	2770.13	11.2449	2770.13	11.2449
SB79121-4	65.5113	102201	0.80952	5.06623	0.594131	14.9253	2.89029	0.548412	2.82857	0.978644	2818.57	64.5833	2810.49	27.5115	2804.68	9.71717	2804.68	9.71717
SB79121-15	49.8347	61493.8	0.820019	4.91787	0.741161	15.7935	1.13993	0.563318	0.866094	0.759779	2880.32	20.1183	2864.39	10.8858	2853.18	12.0693	2853.18	12.0693
SB79121-41	117.848	340818	1.11043	3.53046	0.187451	24.3168	1.99769	0.622639	1.98887	0.995588	3120.41	49.1981	3281.18	19.4854	3380.93	2.92324	3380.93	2.92324
Bitter Creek, Tbc FC facies, BC-71112-1. U-Pb geochronologic analyses.
							Isotope ratios						Apparent ages (Ma)
Analysis	U	206Pb	U/Th	206Pb*	±	207Pb*	±	206Pb*	±	error	206Pb*	±	207Pb*	±	206Pb*	±	Best age	±
	(ppm)	204Pb		207Pb*	(%)	235U*	(%)	238U	(%)	corr.	238U*	(Ma)	235U	(Ma)	207Pb*	(Ma)	(Ma)	(Ma)
BC711121-22	447.091	9087.94	1.83539	30.8234	27.5705	0.022597	27.7017	0.00505161	2.69322	0.0972219	32.4828	0.872632	22.6892	6.21568	-924.638	815.948	32.4828	0.872632
BC711121-51	171.199	3564.98	2.22989	53.9207	103.654	0.0131877	103.864	0.0051573	6.6069	0.0636109	33.1606	2.18526	13.303	13.7278	NA	NA	33.1606	2.18526
BC711121-9	160.169	5100.01	2.61915	16.9461	69.548	0.0430854	69.9302	0.0052954	7.30101	0.104404	34.0463	2.47917	42.832	29.3377	567.509	1749.37	34.0463	2.47917
BC711121-27	313.456	3757.76	1.90759	19.5096	27.3403	0.0377065	27.633	0.00533534	4.0117	0.145178	34.3024	1.37246	37.5823	10.1956	252.422	639.484	34.3024	1.37246
BC711121-2	255.65	7074.04	2.65674	29.5759	42.2372	0.0249722	42.8023	0.00535665	6.93201	0.161954	34.439	2.38095	25.0449	10.5891	-805.752	1245.43	34.439	2.38095
BC711121-23	949.221	20733.3	2.66319	22.215	8.1539	0.0350674	8.72921	0.00564999	3.11658	0.357029	36.3196	1.12875	34.9967	3.0029	-54.8342	198.879	36.3196	1.12875
BC711121-77	1346.21	26460.8	1.05237	20.9164	8.57716	0.0401198	8.6273	0.00608619	0.928713	0.107648	39.1152	0.362168	39.941	3.37895	89.867	203.573	39.1152	0.362168
BC711121-92	166.218	4426.27	1.88898	26.7218	44.6224	0.0315466	46.3323	0.00611388	12.4708	0.269161	39.2926	4.88521	31.537	14.3882	-526.017	1247.22	39.2926	4.88521
BC711121-33	212.862	8531.12	1.6363	26.3032	36.7204	0.0323399	37.2036	0.00616945	5.97614	0.160634	39.6487	2.36219	32.3176	11.8345	-483.938	1002.47	39.6487	2.36219
BC711121-71	209.056	11799.7	1.29451	30.2872	59.6449	0.0288435	60.4892	0.00633586	10.0709	0.166491	40.7148	4.08743	28.8728	17.2206	-873.756	1866.08	40.7148	4.08743
BC711121-97	229.128	5006.15	1.49324	18.8215	42.4036	0.0487769	42.7382	0.00665834	5.33789	0.124897	42.7801	2.276	48.3572	20.1853	334.411	1003.27	42.7801	2.276
BC711121-91	91.3754	2561.73	1.08923	7.24603	187.298	0.128961	187.689	0.0067773	12.1095	0.0645191	43.5419	5.25495	123.163	221.125	2202.33	50.5302	43.5419	5.25495
BC711121-24	221.085	11324.1	1.38724	20.1912	13.379	0.0470138	27.6987	0.00688472	24.2533	0.87561	44.2297	10.6904	46.6488	12.6295	172.808	313.429	44.2297	10.6904
BC711121-21	239.286	8593.76	1.49104	21.6993	27.0248	0.0438213	28.0762	0.0068965	7.61147	0.271101	44.3051	3.36071	43.548	11.9687	2.06064	661.544	44.3051	3.36071
BC711121-99	75.0259	1918.05	1.15346	16.81	35.1009	0.0576667	37.4461	0.00703057	13.0437	0.348333	45.1634	5.8704	56.9277	20.7335	585.042	784.62	45.1634	5.8704
BC711121-54	53.1807	3993.41	0.844346	10.0439	144.82	0.0979165	146.675	0.00713273	23.2554	0.15855	45.8173	10.6172	94.8513	133.588	1615.92	154.175	45.8173	10.6172
BC711121-47	187.489	9229.02	0.743302	19.2926	35.1663	0.0511277	35.8001	0.00715395	6.70643	0.18733	45.9531	3.07086	50.6307	17.6831	278.087	828.385	45.9531	3.07086
BC711121-88	86.3945	2951.61	0.98771	14.5551	97.8743	0.0681331	98.658	0.00719236	12.4111	0.125799	46.199	5.7133	66.9263	63.9837	889.863	#VALUE!	46.199	5.7133
BC711121-57	362.226	11267.9	1.02636	22.0788	22.2198	0.045007	22.3503	0.00720698	2.41168	0.107903	46.2926	1.11243	44.7008	9.77435	-39.876	545.39	46.2926	1.11243
BC711121-4	123.148	5241.79	0.592131	18.3707	32.3058	0.0541969	33.7745	0.00722103	9.85153	0.291685	46.3825	4.55299	53.5911	17.6326	389.046	742.926	46.3825	4.55299
BC711121-89	131.128	3848.81	1.1047	18.4304	65.9753	0.0540946	66.657	0.00723082	9.50884	0.142653	46.4451	4.40052	53.4926	34.7472	381.759	1676.26	46.4451	4.40052
BC711121-98	79.6782	2354.18	1.3112	18.9476	49.2719	0.0529554	50.8851	0.00727719	12.711	0.249798	46.7419	5.91988	52.3946	25.9906	319.202	1188.95	46.7419	5.91988
BC711121-39	179.011	4085.99	1.55267	51.2801	66.9074	0.0196373	67.0799	0.00730345	4.80738	0.0716665	46.91	2.24696	19.7461	13.1184	NA	NA	46.91	2.24696
BC711121-38	345.568	10202.2	2.13957	20.3436	11.1749	0.0495326	11.8886	0.00730832	4.05716	0.341265	46.9411	1.89756	49.0886	5.69717	155.277	262.327	46.9411	1.89756
BC711121-72	231.15	9042.12	1.31487	20.7583	11.3084	0.0486456	12.4432	0.00732375	5.19157	0.417222	47.0399	2.43322	48.2301	5.86112	107.823	267.819	47.0399	2.43322
BC711121-34	186.325	2013.65	1.47327	21.4229	34.7652	0.047271	35.4982	0.00734466	7.1763	0.20216	47.1737	3.37297	46.8982	16.2708	32.8431	855.517	47.1737	3.37297
BC711121-58	289.704	21385.6	0.979928	27.0731	24.0156	0.0374567	24.416	0.00735471	4.40379	0.180365	47.238	2.07266	37.3379	8.95108	-561.103	655.132	47.238	2.07266
BC711121-11	317.556	10741.9	1.682	20.4504	14.541	0.0497833	15.2717	0.00738388	4.66716	0.305609	47.4247	2.20526	49.3311	7.35374	142.979	342.79	47.4247	2.20526
BC711121-65	822.732	28886.6	1.85465	21.1741	8.22555	0.0481054	8.31904	0.00738749	1.24365	0.149495	47.4478	0.587918	47.7069	3.87699	60.7523	196.281	47.4478	0.587918
BC711121-32	449.526	14846.7	3.98283	20.1379	10.846	0.0507578	11.0035	0.00741339	1.85512	0.168594	47.6135	0.880035	50.2733	5.39715	178.971	253.459	47.6135	0.880035
BC711121-25	212.078	10905.4	1.38632	17.2166	28.6022	0.0597536	29.0552	0.00746125	5.11074	0.175897	47.9197	2.43997	58.9292	16.6361	532.929	638.344	47.9197	2.43997
BC711121-50	272.796	14164.6	2.25045	21.9331	18.3133	0.0472166	18.9763	0.00751092	4.97241	0.262032	48.2376	2.38962	46.8455	8.68782	-23.8265	446.579	48.2376	2.38962
BC711121-73	117.566	3621.32	1.44328	21.8992	50.0465	0.0474536	50.3504	0.00753696	5.52295	0.10969	48.4042	2.66333	47.0753	23.1655	-20.0817	1285.13	48.4042	2.66333
BC711121-5	141.89	4475.65	1.2448	30.8275	75.0773	0.0337605	75.4899	0.00754824	7.88114	0.1044	48.4764	3.80616	33.7139	25.0377	-925.029	2543.19	48.4764	3.80616
BC711121-56	84.3725	2121.67	1.27024	17.4564	30.5821	0.0597154	34.0394	0.00756031	14.9469	0.439107	48.5536	7.23	58.8926	19.4788	502.525	687.984	48.5536	7.23
BC711121-13	134.224	6077.25	1.66162	26.0954	27.7108	0.0400231	28.3019	0.00757485	5.75388	0.203304	48.6466	2.78853	39.8466	11.0594	-462.94	743.758	48.6466	2.78853
BC711121-62	66.3859	1817.59	1.37989	7.20402	261.958	0.144998	262.295	0.00757593	13.2898	0.0506676	48.6535	6.44164	137.486	350.565	2212.42	230.461	48.6535	6.44164
BC711121-15	173.046	7682.35	1.80462	24.5494	38.4865	0.0425898	38.7461	0.00758308	4.4781	0.115575	48.6993	2.17259	42.3494	16.0726	-304.188	1016.64	48.6993	2.17259
BC711121-18	118.553	3421.68	1.82907	27.5588	46.8761	0.0379541	47.3352	0.00758608	6.5766	0.138937	48.7185	3.19194	37.8246	17.5767	-609.293	1339.4	48.7185	3.19194
BC711121-1	226.281	10489.2	2.36109	21.537	30.699	0.0488656	31.3765	0.00763287	6.48536	0.206695	49.0178	3.16693	48.4432	14.844	20.0928	752.554	49.0178	3.16693
BC711121-20	187.528	6300.21	2.4933	23.5444	21.0537	0.0447331	24.096	0.00763862	11.7201	0.48639	49.0546	5.72742	44.4346	10.4765	-198.385	532.226	49.0546	5.72742
BC711121-76	125.043	6137.72	1.3586	20.9851	68.1115	0.0502801	68.5903	0.00765255	8.09037	0.117952	49.1437	3.96079	49.8115	33.3534	82.0435	1838.07	49.1437	3.96079
BC711121-26	326.151	8602.9	2.46531	20.0818	12.4084	0.0527649	13.33	0.00768506	4.87048	0.365377	49.3517	2.39449	52.211	6.78393	185.472	289.874	49.3517	2.39449
BC711121-42	117.86	5471.79	1.62046	21.2544	44.7403	0.050105	46.1117	0.00772377	11.1622	0.242068	49.5993	5.51512	49.6422	22.3439	51.7191	1118.87	49.5993	5.51512
BC711121-96	140.266	4260.91	1.40041	18.6859	20.284	0.0573612	20.867	0.00777377	4.89795	0.234723	49.9192	2.43558	56.6344	11.4948	350.729	462.664	49.9192	2.43558
BC711121-82	1219.33	38279.2	6.17904	20.6608	2.168	0.0942596	2.61898	0.0141244	1.4693	0.561021	90.4149	1.31919	91.4636	2.2907	118.886	51.098	90.4149	1.31919
BC711121-74	270.9	14335.6	1.97877	21.9044	9.44909	0.0900914	9.75953	0.0143124	2.44195	0.250212	91.6098	2.22125	87.5885	8.19009	-20.6542	229.09	91.6098	2.22125
BC711121-100	69.3429	3885.78	1.26782	17.0704	33.1326	0.118476	34.0497	0.014668	7.84932	0.230525	93.8693	7.31472	113.689	36.6383	551.572	742.219	93.8693	7.31472
BC711121-61	203.876	16614.5	1.97779	21.8811	19.1598	0.0938513	19.5131	0.0148939	3.6963	0.189427	95.3043	3.49683	91.0847	17.0012	-18.0824	467.041	95.3043	3.49683
BC711121-17	361.33	21828	1.34664	19.3919	4.91505	0.106722	5.099	0.0150098	1.35722	0.266174	96.0401	1.29381	102.962	4.99268	266.292	112.812	96.0401	1.29381
BC711121-75	251.866	4637.14	1.53292	21.2791	15.0696	0.0994299	15.1589	0.0153451	1.64309	0.108392	98.1694	1.6008	96.2499	13.9211	48.9231	361.615	98.1694	1.6008
BC711121-6	30.3452	1303.98	1.34991	8.00318	256.915	0.269048	257.384	0.0156168	15.5427	0.0603871	99.8942	15.4066	241.932	621.619	2028.08	353.974	99.8942	15.4066
BC711121-45	135.125	10737	1.77309	20.6261	13.1486	0.168185	13.4307	0.0251595	2.73815	0.203873	160.182	4.33198	157.843	19.6362	122.847	310.836	160.182	4.33198
BC711121-48	131.788	13519.7	1.39139	19.9376	15.018	0.175894	15.1688	0.0254345	2.13343	0.140646	161.911	3.41123	164.521	23.043	202.24	350.32	161.911	3.41123
BC711121-28	229.414	12851.1	1.61877	21.4358	7.40724	0.164417	7.63649	0.0255615	1.85708	0.243185	162.709	2.98383	154.562	10.9491	31.3695	177.67	162.709	2.98383
BC711121-93	156.047	22550.3	1.9675	19.9504	6.24734	0.245338	6.34275	0.0354989	1.09599	0.172795	224.873	2.4221	222.782	12.6884	200.757	145.203	224.873	2.4221
BC711121-85	236.552	64778.6	2.12214	19.9869	6.14998	0.258614	6.21725	0.0374883	0.912098	0.146705	237.246	2.12458	233.55	12.9721	196.541	143.016	237.246	2.12458
BC711121-40	64.433	39887.9	2.39219	16.0873	5.44619	0.923201	5.85835	0.107716	2.15855	0.368457	659.468	13.5311	664.052	28.5622	679.624	116.443	659.468	13.5311
BC711121-68	11.2275	8411.15	1.63823	14.8783	11.0153	1.71039	11.4055	0.184565	2.95773	0.259326	1091.86	29.7078	1012.43	73.2079	844.363	229.836	844.363	229.836
BC711121-79	236.793	123268	4.81085	13.6469	0.84962	1.76096	1.70659	0.174294	1.48007	0.867265	1035.73	14.1614	1031.2	11.0526	1021.59	17.1985	1021.59	17.1985
BC711121-46	79.5589	67194.7	2.32758	13.53	2.55675	1.82194	2.83591	0.178785	1.22695	0.432649	1060.34	11.9962	1053.38	18.5933	1038.98	51.6249	1038.98	51.6249
BC711121-44	120.789	124088	0.788063	13.5112	1.27193	1.85464	1.84569	0.18174	1.33745	0.724635	1076.47	13.2595	1065.08	12.1764	1041.8	25.6883	1041.8	25.6883
BC711121-70	184.145	143640	2.22723	13.4326	0.896054	1.798	1.60003	0.175166	1.32558	0.828476	1040.51	12.7373	1044.73	10.4403	1053.59	18.0699	1053.59	18.0699
BC711121-3	50.4564	31141.6	1.47842	13.4043	2.91704	1.8199	4.19823	0.176925	3.01927	0.719177	1050.15	29.2593	1052.65	27.5179	1057.85	58.7549	1057.85	58.7549
BC711121-12	67.3701	59949.7	0.540655	13.171	2.882	1.89419	3.96947	0.180943	2.7296	0.68765	1072.12	26.9608	1079.05	26.385	1093.06	57.7445	1093.06	57.7445
BC711121-64	18.6341	20449.1	1.46423	12.9343	7.58254	2.08777	8.11305	0.19585	2.88561	0.355674	1152.99	30.4653	1144.79	55.7556	1129.29	151.222	1129.29	151.222
BC711121-80	211.869	97465.5	3.33994	12.9316	0.559443	2.05188	1.03875	0.192443	0.87523	0.842579	1134.6	9.10554	1132.92	7.09142	1129.69	11.1327	1129.69	11.1327
BC711121-8	245.25	182968	3.72459	12.6222	0.61808	2.18071	0.918182	0.199633	0.678996	0.7395	1173.35	7.28401	1174.9	6.39202	1177.79	12.2437	1177.79	12.2437
BC711121-10	178.039	287597	1.05447	12.6118	1.11488	2.24916	1.75329	0.205729	1.35316	0.771788	1206.02	14.8838	1196.52	12.324	1179.43	22.0635	1179.43	22.0635
BC711121-55	117.527	3850.5	1.40327	12.5561	1.31495	1.87633	4.93107	0.17087	4.75251	0.963789	1016.9	44.71	1072.77	32.6732	1188.16	25.9676	1188.16	25.9676
BC711121-66	71.5824	43279.6	2.51413	12.3384	1.80334	2.24357	3.39333	0.200769	2.87448	0.847097	1179.45	30.9826	1194.78	23.837	1222.58	35.436	1222.58	35.436
BC711121-94	237.304	10134.7	1.99718	11.9282	0.671002	2.35152	0.856719	0.203434	0.532658	0.621741	1193.74	5.80455	1228.02	6.10353	1288.7	13.0608	1288.7	13.0608
BC711121-37	87.9833	55203.2	2.2062	11.7221	1.03862	2.67553	1.4078	0.227465	0.950357	0.675065	1321.2	11.353	1321.72	10.4058	1322.55	20.1203	1322.55	20.1203
BC711121-78	61.7233	81000.7	1.25924	11.5933	1.60395	2.77439	1.85899	0.233279	0.939781	0.505533	1351.66	11.4593	1348.67	13.8757	1343.92	30.9814	1343.92	30.9814
BC711121-84	114.765	86762.9	1.92489	10.7574	0.756725	3.34478	1.24249	0.260961	0.985471	0.793141	1494.76	13.1473	1491.57	9.71262	1487.03	14.333	1487.03	14.333
BC711121-53	39.0523	27234.6	0.52392	9.87456	2.58638	3.93038	3.82031	0.281482	2.81165	0.735976	1598.82	39.8129	1619.96	30.9326	1647.51	47.9732	1647.51	47.9732
BC711121-43	277.386	327631	1.9218	9.514	0.346148	4.55493	1.15908	0.314299	1.10619	0.954366	1761.83	17.0529	1741.06	9.65075	1716.19	6.36415	1716.19	6.36415
BC711121-29	227.82	308716	5.81481	9.5131	0.395149	4.52751	0.92589	0.312378	0.837335	0.904357	1752.4	12.8481	1736.04	7.70066	1716.37	7.26492	1716.37	7.26492
BC711121-60	61.4378	93661.2	1.56135	9.37499	1.46072	4.61215	1.78831	0.313597	1.03167	0.576899	1758.39	15.8771	1751.47	14.9238	1743.2	26.7651	1743.2	26.7651
BC711121-87	50.6859	41984.5	0.696415	9.33274	0.54933	4.58892	1.78752	0.310612	1.70102	0.951608	1743.72	25.9881	1747.26	14.9037	1751.48	10.0536	1751.48	10.0536
BC711121-83	37.0374	41581.1	1.4394	9.1921	1.8008	4.79665	2.53967	0.319781	1.79083	0.705141	1788.66	27.9721	1784.31	21.3419	1779.22	32.8505	1779.22	32.8505
BC711121-7	58.0189	82432.6	3.63989	8.85162	0.933068	5.17853	1.49404	0.332452	1.16685	0.781003	1850.25	18.7677	1849.09	12.7156	1847.78	16.877	1847.78	16.877
BC711121-30	69.6069	53252.9	1.65555	8.7997	1.09781	5.45503	1.45945	0.348148	0.961675	0.658929	1925.75	16.0093	1893.55	12.5239	1858.41	19.8318	1858.41	19.8318
BC711121-86	55.6486	107083	0.54625	8.51544	0.774276	5.57272	1.43035	0.34417	1.20266	0.840817	1906.7	19.8509	1911.89	12.3144	1917.52	13.8877	1917.52	13.8877
BC711121-95	382.584	54118.9	5.40644	6.9068	0.394553	7.93368	1.48769	0.397421	1.43442	0.96419	2157.15	26.2978	2223.51	13.4157	2285.21	6.79095	2285.21	6.79095
BC711121-81	126.339	141498	3.21892	5.68892	0.26513	12.133	0.616778	0.500607	0.556886	0.902894	2616.4	11.9761	2614.74	5.78586	2613.44	4.41429	2613.44	4.41429
BC711121-49	79.7798	100173	0.697649	5.60547	0.333337	12.7855	1.08987	0.519791	1.03765	0.95208	2698.29	22.8778	2663.98	10.264	2638.02	5.53355	2638.02	5.53355
BC711121-36	107.892	187247	1.69987	5.55135	3.07835	12.9651	10.6235	0.522005	10.1677	0.957097	2707.68	224.893	2677.12	100.471	2654.11	51.0609	2654.11	51.0609
BC711121-59	49.5333	209211	0.616615	5.37435	0.413604	13.4488	1.22583	0.524212	1.15395	0.941359	2717.02	25.5841	2711.69	11.586	2707.71	6.82512	2707.71	6.82512
BC711121-69	72.2607	295026	1.09137	5.27069	0.426299	14.0831	1.18	0.538351	1.10031	0.932461	2776.54	24.8224	2755.32	11.1876	2739.79	7.01035	2739.79	7.01035
BC711121-63	134.403	365198	0.621507	5.22132	0.221181	13.8328	0.577064	0.523827	0.532993	0.923629	2715.39	11.8112	2738.33	5.46443	2755.27	3.6338	2755.27	3.6338
BC711121-31	54.1073	84559.4	1.4321	5.19891	0.276348	14.2503	1.17348	0.537324	1.14048	0.971876	2772.24	25.6967	2766.51	11.1345	2762.33	4.53714	2762.33	4.53714
BC711121-35	39.8629	31803.6	1.42098	3.91348	0.739296	22.0201	1.70284	0.625	1.53399	0.900839	3129.79	38.034	3184.61	16.5408	3219.32	11.6696	3219.32	11.6696
Elk Springs, Tbc UMG facies, Tbp-7912-1. U-Pb geochronologic analyses.
							Isotope ratios						Apparent ages (Ma)
Analysis	U	206Pb	U/Th	206Pb*	±	207Pb*	±	206Pb*	±	error	206Pb*	±	207Pb*	±	206Pb*	±	Best age	±
	(ppm)	204Pb		207Pb*	(%)	235U*	(%)	238U	(%)	corr.	238U*	(Ma)	235U	(Ma)	207Pb*	(Ma)	(Ma)	(Ma)
TBP79121-29	349.597	16673.2	0.799478	17.8259	15.3219	0.0353807	15.8183	0.00457422	3.93194	0.248568	29.4201	1.15414	35.304	5.48859	456.25	341.769	29.4201	1.15414
TBP79121-39	379.991	1126.54	0.826221	21.845	23.4228	0.0289179	23.9622	0.0045816	5.05565	0.210984	29.4675	1.48637	28.9462	6.8383	-14.0893	572.794	29.4675	1.48637
TBP79121-44	202.026	4636.12	0.804029	17.0316	45.5213	0.0372521	46.348	0.00460156	8.7148	0.18803	29.5955	2.57328	37.1376	16.9031	556.524	1045.38	29.5955	2.57328
TBP79121-25	145.915	2412.34	1.07379	18.3455	50.4265	0.0346023	51.2136	0.00460399	8.94429	0.174647	29.6111	2.64243	34.5404	17.3936	392.127	1205.84	29.6111	2.64243
TBP79121-77	274.737	5186.4	0.968531	22.2065	33.2949	0.0286095	33.5026	0.00460774	3.72453	0.111172	29.6352	1.10124	28.6418	9.46193	-53.9039	830.803	29.6352	1.10124
TBP79121-67	274.484	5900.93	0.975612	27.8546	37.6245	0.0228417	38.2338	0.00461449	6.79854	0.177815	29.6785	2.01307	22.9321	8.66977	-638.465	1062.02	29.6785	2.01307
TBP79121-91	510.151	15585.6	0.787788	20.1964	28.4754	0.0315298	28.6126	0.00461844	2.79877	0.097816	29.7038	0.82943	31.5205	8.88051	172.204	676.702	29.7038	0.82943
TBP79121-75	319.151	5554.88	0.824914	33.2338	55.0375	0.019211	55.3389	0.0046305	5.76789	0.104229	29.7813	1.71379	19.3215	10.5916	NA	NA	29.7813	1.71379
TBP79121-21	251.45	4098.31	0.757288	21.4173	35.9204	0.0301068	36.7127	0.00467658	7.58605	0.206633	30.0769	2.27633	30.1188	10.8955	33.485	885.536	30.0769	2.27633
TBP79121-79	435.89	9520.36	1.75969	23.7313	21.432	0.0275407	21.9544	0.00474019	4.7609	0.216854	30.485	1.44794	27.5862	5.97492	-218.235	544.094	30.485	1.44794
TBP79121-7	295.308	6288.14	0.823291	21.3814	21.2844	0.0311774	21.8897	0.00483476	5.11244	0.233554	31.0918	1.58572	31.1735	6.72021	37.4524	514.386	31.0918	1.58572
TBP79121-90	128.535	1727.47	2.8273	16.6658	46.0007	0.0404318	47.9264	0.00488707	13.4491	0.28062	31.4274	4.21642	40.2456	18.9132	603.663	1049.64	31.4274	4.21642
TBP79121-60	424.844	7886.79	1.38771	24.6665	28.1129	0.0281543	28.3101	0.00503676	3.33618	0.117844	32.3876	1.0778	28.1924	7.87168	-316.377	732.916	32.3876	1.0778
TBP79121-84	65.3874	1652.83	0.985117	5.62551	149.157	0.123902	150.21	0.00505523	17.7608	0.11824	32.506	5.75881	118.604	169.707	2632.09	483.656	32.506	5.75881
TBP79121-72	186.947	3380.48	1.31985	24.7622	53.3809	0.0288298	54.2198	0.00517761	9.5006	0.175224	33.2909	3.15468	28.8593	15.4283	-326.311	1465.88	33.2909	3.15468
TBP79121-46	114.452	2808.57	1.12676	20.5789	50.3226	0.0348051	51.5383	0.00519475	11.1277	0.215911	33.4008	3.70713	34.7394	17.6031	128.284	1259.04	33.4008	3.70713
TBP79121-11	162.892	5169.88	0.735872	-4.55554	890.153	-0.16565	890.179	0.00547306	6.68777	0.00751284	35.1854	2.34671	-183.888	NA	NA	NA	35.1854	2.34671
TBP79121-93	1286.84	15109.5	2.24486	21.7314	6.78293	0.0377049	6.90726	0.00594271	1.30466	0.188882	38.1958	0.496851	37.5808	2.54836	-1.50459	163.68	38.1958	0.496851
TBP79121-53	641.679	19089.4	3.25982	21.5581	8.64884	0.0471182	8.86386	0.0073671	1.9405	0.218923	47.3173	0.91483	46.7501	4.04993	17.7273	208.078	47.3173	0.91483
TBP79121-98	158.4	15814.3	0.957175	20.2408	31.8554	0.0611905	32.2624	0.00898278	5.10831	0.158336	57.6482	2.93172	60.305	18.8915	167.079	761.346	57.6482	2.93172
TBP79121-3	32.205	1613.77	0.686099	-4.45791	445.108	-0.338724	445.315	0.0109515	13.5776	0.0304899	70.2144	9.48173	-419.945	NA	NA	NA	70.2144	9.48173
TBP79121-71	82.4693	9975.34	1.83583	19.4925	25.9891	0.121354	26.5411	0.0171561	5.38491	0.20289	109.657	5.85501	116.299	29.1728	254.398	606.64	109.657	5.85501
TBP79121-9	340.582	82043.6	0.674864	19.605	4.17287	0.182266	4.96208	0.0259162	2.68503	0.54111	164.938	4.37247	170.008	7.7677	241.158	96.1954	164.938	4.37247
TBP79121-42	476.813	42473.2	2.14318	20.453	4.15551	0.179994	4.4836	0.0267001	1.68359	0.3755	169.862	2.82243	168.055	6.94451	142.692	97.5516	169.862	2.82243
TBP79121-56	248.272	46463.8	2.63882	17.2311	1.26917	0.679895	1.88162	0.0849679	1.38913	0.738264	525.708	7.01292	526.711	7.73267	531.085	27.8139	525.708	7.01292
TBP79121-15	523.806	142425	4.29199	16.9895	0.635812	0.751007	1.40227	0.0925388	1.24985	0.8913	570.534	6.82436	568.808	6.10695	561.892	13.8489	570.534	6.82436
TBP79121-43	76.3988	72182.3	2.10093	13.9258	3.15577	1.61893	3.28216	0.16351	0.902052	0.274835	976.256	8.17195	977.574	20.6041	980.518	64.2945	980.518	64.2945
TBP79121-92	61.044	43234.8	1.33987	13.8927	2.77221	1.57	2.88166	0.158192	0.786631	0.272979	946.722	6.92618	958.425	17.8765	985.399	56.4236	985.399	56.4236
TBP79121-23	46.8522	36097.5	1.39597	13.6745	2.6291	1.72317	3.0904	0.170898	1.62431	0.5256	1017.06	15.2829	1017.21	19.8588	1017.5	53.2586	1017.5	53.2586
TBP79121-6	147.96	72744.3	3.95165	13.6433	0.83865	1.73157	1.68237	0.171339	1.45843	0.866893	1019.48	13.7524	1020.33	10.8291	1022.14	16.9748	1022.14	16.9748
TBP79121-55	187.887	108041	2.36683	13.5737	1.03088	1.79539	1.37447	0.176748	0.909089	0.661411	1049.19	8.8023	1043.78	8.96381	1032.48	20.8523	1032.48	20.8523
TBP79121-37	107.393	89811.3	2.00166	13.3497	1.94749	1.87725	2.35574	0.181757	1.32543	0.56264	1076.57	13.1413	1073.09	15.6076	1066.05	39.1797	1066.05	39.1797
TBP79121-64	52.9887	33934	1.61506	13.253	2.06175	1.92066	2.40952	0.184613	1.24697	0.517519	1092.13	12.5274	1088.3	16.0903	1080.66	41.3701	1080.66	41.3701
TBP79121-1	37.8989	36572.3	1.79771	13.2294	2.27972	1.92074	3.25651	0.184292	2.32546	0.714095	1090.38	23.328	1088.33	21.7483	1084.23	45.7288	1084.23	45.7288
TBP79121-32	108.36	101383	1.57542	13.1907	0.877917	1.94019	1.58749	0.185613	1.32265	0.833167	1097.57	13.3484	1095.06	10.6372	1090.08	17.5898	1090.08	17.5898
TBP79121-19	32.4019	41312.9	1.66499	13.0936	5.05427	1.9622	5.14854	0.186339	0.980737	0.190488	1101.51	9.93038	1102.64	34.6427	1104.85	101.118	1104.85	101.118
TBP79121-88	74.1716	38784.8	2.27096	12.885	1.67145	2.07167	1.83674	0.1936	0.761494	0.414589	1140.85	7.96216	1139.49	12.579	1136.91	33.2388	1136.91	33.2388
TBP79121-35	84.8254	50597.3	1.98686	12.7433	2.2629	2.17872	2.63216	0.201364	1.34446	0.510782	1182.64	14.5269	1174.27	18.3206	1158.85	44.8838	1158.85	44.8838
TBP79121-58	49.2046	38750.2	1.43458	12.7148	3.9854	2.21099	4.52877	0.20389	2.1509	0.474941	1196.18	23.4828	1184.52	31.6737	1163.28	79.0069	1163.28	79.0069
TBP79121-59	155.933	128715	2.38888	12.5884	1.21988	2.21274	1.55972	0.202022	0.971908	0.623132	1186.17	10.53	1185.08	10.908	1183.1	24.1263	1183.1	24.1263
TBP79121-97	37.9566	27854.5	1.35952	12.4273	3.3088	2.35144	3.43493	0.211939	0.922279	0.2685	1239.14	10.3971	1228	24.4757	1208.49	65.1676	1208.49	65.1676
TBP79121-89	25.6542	22309.8	1.29628	12.0688	4.1795	2.34084	5.06407	0.204897	2.85947	0.564659	1201.57	31.3467	1224.78	36.0435	1265.86	81.6334	1265.86	81.6334
TBP79121-62	91.9961	68260.9	1.3161	11.7083	1.18051	2.72365	1.62187	0.231283	1.11213	0.685711	1341.22	13.4667	1334.93	12.0461	1324.83	22.863	1324.83	22.863
TBP79121-13	223.437	134625	1.6032	11.4409	0.455552	2.88342	0.980163	0.239257	0.867866	0.885431	1382.84	10.8013	1377.59	7.38974	1369.44	8.76829	1369.44	8.76829
TBP79121-27	30.8379	23173.7	1.23186	11.2853	1.95157	3.10623	2.52609	0.25424	1.6039	0.634934	1460.31	20.9585	1434.23	19.4053	1395.75	37.4271	1395.75	37.4271
TBP79121-85	76.5483	86867.1	1.74511	11.1927	1.20687	3.1327	1.6203	0.254303	1.08113	0.667243	1460.63	14.1302	1440.76	12.4719	1411.53	23.0934	1411.53	23.0934
TBP79121-48	47.9721	38328	1.11216	11.1517	2.26501	3.13681	2.71241	0.253704	1.49228	0.550167	1457.55	19.4671	1441.77	20.8866	1418.55	43.3035	1418.55	43.3035
TBP79121-12	152.118	77923.9	0.801418	11.1505	0.652487	2.94393	2.58819	0.238078	2.50459	0.967701	1376.7	31.0477	1393.28	19.6191	1418.75	12.4728	1418.75	12.4728
TBP79121-68	65.5119	41316.7	1.61733	11.1228	1.68219	3.0053	1.96603	0.242438	1.01759	0.517587	1399.36	12.8003	1408.96	14.9797	1423.5	32.1377	1423.5	32.1377
TBP79121-4	821.521	506799	84.2729	11.1196	0.253327	2.51568	3.11596	0.202882	3.10565	0.99669	1190.78	33.7672	1276.57	22.6433	1424.05	4.83903	1424.05	4.83903
TBP79121-16	116.94	311519	1.20649	11.0968	0.652407	3.08207	0.986131	0.24805	0.739472	0.749872	1428.41	9.47431	1428.24	7.56022	1427.97	12.4557	1427.97	12.4557
TBP79121-15	75.7223	157567	0.495745	11.0927	1.72476	3.15176	2.36187	0.253564	1.61358	0.683179	1456.83	21.0403	1445.43	18.2076	1428.68	32.9278	1428.68	32.9278
TBP79121-45	148.597	107586	3.40552	11.0841	0.450752	2.86591	1.31695	0.230388	1.23741	0.939602	1336.53	14.9366	1373	9.91345	1430.17	8.60311	1430.17	8.60311
TBP79121-54	97.7024	107006	1.21784	11.0717	0.941586	3.12333	1.88125	0.250802	1.62865	0.865729	1442.61	21.0518	1438.45	14.4702	1432.29	17.9664	1432.29	17.9664
TBP79121-24	116.261	118690	1.15661	11.0694	0.450322	3.13388	1.00149	0.251597	0.89453	0.893203	1446.71	11.5919	1441.05	7.70917	1432.69	8.59197	1432.69	8.59197
TBP79121-74	49.4483	50941.6	1.22985	11.0693	1.77884	3.04583	2.34151	0.244526	1.52263	0.650277	1410.18	19.2857	1419.19	17.9007	1432.7	33.942	1432.7	33.942
TBP79121-33	768.607	1.02045e+06	13.1797	11.0548	0.111846	2.87419	1.09445	0.230443	1.08872	0.994764	1336.82	13.1442	1375.17	8.24457	1435.21	2.13325	1435.21	2.13325
TBP79121-40	156.843	142200	2.54792	11.0435	0.444176	3.20174	1.10335	0.256442	1.01	0.91539	1471.61	13.2888	1457.58	8.53713	1437.16	8.46957	1437.16	8.46957
TBP79121-38	101.492	45805.3	1.12656	11.0305	0.789395	3.20399	1.59588	0.256322	1.38697	0.869095	1471	18.242	1458.12	12.3504	1439.4	15.0478	1439.4	15.0478
TBP79121-20	106.257	91961	1.4275	11.0241	0.780867	3.15335	1.25797	0.252125	0.986275	0.78402	1449.43	12.8022	1445.82	9.69812	1440.5	14.8831	1440.5	14.8831
TBP79121-47	111.768	115379	0.961189	11.0229	1.26419	3.11952	3.23601	0.249391	2.97886	0.920534	1435.34	38.3315	1437.51	24.8867	1440.72	24.0949	1440.72	24.0949
TBP79121-36	96.3744	97875.9	0.69795	11.0221	0.984624	3.13673	3.94283	0.250749	3.81791	0.968317	1442.33	49.3424	1441.75	30.366	1440.86	18.7658	1440.86	18.7658
TBP79121-49	111.333	149432	1.45677	11.014	0.903659	3.09672	1.17388	0.247368	0.749257	0.638276	1424.89	9.57852	1431.88	9.01009	1442.26	17.2194	1442.26	17.2194
TBP79121-94	44.7395	43469.2	1.27564	10.9751	0.878833	3.08699	1.29063	0.245721	0.945186	0.732345	1416.37	12.0187	1429.46	9.89867	1448.99	16.7311	1448.99	16.7311
TBP79121-34	212.157	100257	1.51948	10.9624	0.608594	3.16183	1.52856	0.251387	1.40218	0.917321	1445.62	18.1582	1447.89	11.7919	1451.2	11.5828	1451.2	11.5828
TBP79121-52	319.2	13766.7	1.74887	10.9587	0.274616	2.98417	0.978999	0.237181	0.939694	0.959852	1372.02	11.6132	1403.59	7.4457	1451.85	5.22602	1451.85	5.22602
TBP79121-5	133.423	174270	1.41753	10.9448	1.09737	3.29172	2.36431	0.261295	2.09422	0.885762	1496.46	27.9677	1479.1	18.4151	1454.25	20.877	1454.25	20.877
TBP79121-26	61.7985	82341.9	1.13589	10.9439	1.31969	3.15739	2.26511	0.25061	1.84096	0.812747	1441.62	23.7816	1446.81	17.469	1454.42	25.1064	1454.42	25.1064
TBP79121-63	50.8474	47612	1.05104	10.8593	2.44837	2.75052	3.33145	0.216628	2.25921	0.678146	1264.03	25.9319	1342.23	24.8127	1469.17	46.4915	1469.17	46.4915
TBP79121-8	43.464	35882.8	1.16297	10.8494	1.21141	3.20394	2.1869	0.252109	1.82072	0.832556	1449.34	23.6324	1458.11	16.9249	1470.9	22.9952	1470.9	22.9952
TBP79121-2A	35.8586	50231.4	0.703343	10.8478	3.15422	3.16017	3.50008	0.248628	1.51706	0.433434	1431.4	19.4732	1447.49	27.0029	1471.18	59.8827	1471.18	59.8827
TBP79121-96	92.3274	110374	2.74868	10.6985	1.29751	3.38443	1.5897	0.262608	0.918484	0.577772	1503.17	12.3149	1500.8	12.4606	1497.43	24.5408	1497.43	24.5408
TBP79121-70	78.9932	89731.3	1.59574	10.6724	1.23489	3.43912	1.56651	0.266199	0.963839	0.615278	1521.48	13.0626	1513.38	12.3235	1502.06	23.342	1502.06	23.342
TBP79121-10	115.768	7133.23	1.58244	10.6591	3.31829	2.98085	9.40047	0.230441	8.79532	0.935626	1336.81	106.196	1402.75	71.5916	1504.4	62.7203	1504.4	62.7203
TBP79121-51	110.293	197318	1.40183	10.5689	1.12048	3.4826	1.89207	0.266951	1.52462	0.805792	1525.31	20.7086	1523.28	14.927	1520.45	21.1274	1520.45	21.1274
TBP79121-30	199.455	238706	4.80207	10.1962	0.375194	3.81978	0.838645	0.282472	0.750037	0.894343	1603.8	10.6495	1596.92	6.74878	1587.84	7.01247	1587.84	7.01247
TBP79121-17	71.3637	30177.7	1.306	10.1034	1.21555	3.77459	2.04388	0.27659	1.64314	0.80393	1574.17	22.9499	1587.36	16.4081	1604.9	22.6676	1604.9	22.6676
TBP79121-99	19.9826	22098.5	0.228612	9.88323	4.7639	4.00196	4.90236	0.28686	1.15686	0.235981	1625.82	16.6242	1634.59	39.8465	1645.88	88.4167	1645.88	88.4167
TBP79121-69	620.482	16085	3.80702	9.73368	0.356393	3.71343	1.27617	0.262151	1.22539	0.960213	1500.84	16.4072	1574.27	10.2092	1674.11	6.58749	1674.11	6.58749
TBP79121-22	65.189	115614	3.05135	9.66078	1.38205	4.32244	2.45874	0.302859	2.03356	0.827072	1705.47	30.4734	1697.65	20.2777	1688	25.4981	1688	25.4981
TBP79121-81	314.878	457793	7.09047	9.59079	0.25645	4.44149	2.35219	0.308946	2.33816	0.994039	1735.52	35.5761	1720.11	19.4969	1701.4	4.72204	1701.4	4.72204
TBP79121-50	92.7137	140493	0.989118	9.54908	0.451995	4.34366	1.3434	0.300827	1.26508	0.941699	1695.41	18.8596	1701.69	11.0884	1709.42	8.31559	1709.42	8.31559
TBP79121-18	50.8546	66870.7	0.716961	9.54389	1.95179	4.1897	2.22584	0.290006	1.06998	0.480707	1641.56	15.5063	1672.01	18.2478	1710.42	35.9108	1710.42	35.9108
TBP79121-28	91.5318	166009	2.45333	9.53111	0.645595	4.40628	1.33724	0.304589	1.17107	0.87574	1714.02	17.6256	1713.52	11.067	1712.89	11.873	1712.89	11.873
TBP79121-61	225.472	338009	2.9547	9.52806	0.319841	4.47206	1.42869	0.309037	1.39242	0.974619	1735.97	21.1909	1725.8	11.8561	1713.48	5.8825	1713.48	5.8825
TBP79121-82	1116.75	21002.4	4.40461	9.52588	0.156198	4.20937	1.25031	0.290818	1.24052	0.992166	1645.61	18.0168	1675.85	10.2588	1713.9	2.87263	1713.9	2.87263
TBP79121-31	89.7534	40744.4	1.66247	9.34745	0.759337	4.54024	1.91014	0.307801	1.75273	0.91759	1729.88	26.5928	1738.37	15.8958	1748.59	13.9028	1748.59	13.9028
TBP79121-86	48.5532	111983	1.12883	9.05681	1.28388	4.93958	1.41313	0.324462	0.590419	0.417808	1811.48	9.32402	1809.05	11.9335	1806.22	23.3416	1806.22	23.3416
TBP79121-73	69.0086	70877.5	1.27579	8.94921	0.689428	5.06048	1.24976	0.328455	1.04239	0.834076	1830.89	16.6142	1829.51	10.5963	1827.92	12.4997	1827.92	12.4997
TBP79121-66	64.7847	88810.8	2.42196	8.72979	1.26393	5.30851	1.52733	0.336105	0.857448	0.561405	1867.91	13.9047	1870.23	13.0506	1872.81	22.7917	1872.81	22.7917
TBP79121-80	85.8315	170725	1.13799	8.63042	0.591433	5.59972	0.711917	0.350507	0.396274	0.556629	1937.02	6.63	1916.05	6.13346	1893.42	10.6382	1893.42	10.6382
TBP79121-57	91.0013	206557	1.40332	7.71668	0.567615	6.87711	1.46317	0.384889	1.34858	0.921686	2099.08	24.1611	2095.71	12.9714	2092.39	9.97832	2092.39	9.97832
TBP79121-76	763.188	823593	5.52137	7.71615	1.49717	6.12935	2.15766	0.343016	1.5537	0.720087	1901.16	25.5813	1994.44	18.8377	2092.51	26.3159	2092.51	26.3159
TBP79121-65	123.149	848312	1.06342	5.64397	0.31225	12.2579	2.20301	0.501765	2.18077	0.989904	2621.38	46.9714	2624.35	20.6846	2626.64	5.19216	2626.64	5.19216
TBP79121-95	48.0504	66541.8	1.08101	5.39921	0.472345	13.2888	0.712777	0.520374	0.533799	0.7489	2700.77	11.7777	2700.39	6.73101	2700.09	7.8001	2700.09	7.8001
TBP79121-41	61.3166	209293	0.982721	4.46376	0.266558	18.2942	0.9201	0.592262	0.880642	0.957116	2998.59	21.1163	3005.34	8.85855	3009.84	4.28201	3009.84	4.28201
Sand Wash, Tbc UMG facies, Tbp-SW-52913. U-Pb geochronologic analyses.
							Isotope ratios						Apparent ages (Ma)
Analysis	U	206Pb	U/Th	206Pb*	±	207Pb*	±	206Pb*	±	error	206Pb*	±	207Pb*	±	206Pb*	±	Best age	±
	(ppm)	204Pb		207Pb*	(%)	235U*	(%)	238U	(%)	corr.	238U*	(Ma)	235U	(Ma)	207Pb*	(Ma)	(Ma)	(Ma)
Tbp SW 52913-2	288.781	3665.09	1.57039	19.7463	33.8272	0.029088	34.4057	0.0041658	6.28262	0.182604	26.7987	1.68017	29.1141	9.87497	224.576	802.634	26.7987	1.68017
Tbp SW 52913-90	283.623	2582.6	1.75977	25.2468	43.1328	0.0233886	43.6773	0.00428262	6.87509	0.157406	27.5486	1.88995	23.4749	10.1359	-376.365	1166.2	27.5486	1.88995
Tbp SW 52913-21	218.669	5794.24	1.95927	8.88554	182.994	0.0819684	183.27	0.00528237	10.0551	0.0548648	33.9627	3.406	79.9939	141.895	1840.86	182.973	33.9627	3.406
Tbp SW 52913-88	138.172	1707.99	0.80774	13.5141	129.631	0.0543884	129.863	0.00533078	7.76225	0.0597725	34.2732	2.65331	53.7756	68.1198	1041.37	472.196	34.2732	2.65331
Tbp SW 52913-77	482.748	5163.49	1.60168	22.1945	21.339	0.0331372	21.7957	0.0053341	4.43861	0.203646	34.2944	1.51816	33.1015	7.09849	-52.5958	524.588	34.2944	1.51816
Tbp SW 52913-43	136.818	2069.81	1.31	32.2912	77.1425	0.0318887	77.7317	0.00746826	9.55216	0.122886	47.9646	4.56466	31.8737	24.3958	-1062.35	2722.94	47.9646	4.56466
Tbp SW 52913-18	524.281	10531.8	1.20374	21.0856	12.8773	0.0507301	13.4746	0.00775802	3.96739	0.294435	49.8184	1.96887	50.2465	6.60581	70.7274	307.343	49.8184	1.96887
Tbp SW 52913-33	89.847	4878.37	1.65983	22.0351	27.6837	0.15908	28.0703	0.0254232	4.64303	0.165407	161.84	7.42073	149.898	39.1377	-35.0702	682.968	161.84	7.42073
Tbp SW 52913-16	197.658	14492.7	1.10522	19.0145	10.299	0.202912	10.485	0.0279827	1.96573	0.187481	177.91	3.44941	187.587	17.9604	311.233	234.979	177.91	3.44941
Tbp SW 52913-39	103.897	13874.4	1.54905	17.5523	4.26901	0.656149	5.02402	0.0835286	2.64884	0.527235	517.151	13.1634	512.255	20.2135	490.484	94.2209	517.151	13.1634
Tbp SW 52913-67	132.426	18664.6	1.37684	16.5082	1.9166	0.816544	2.52517	0.0977638	1.64412	0.651094	601.291	9.43892	606.118	11.5258	624.188	41.3427	601.291	9.43892
Tbp SW 52913-73	247.759	68317.3	2.16002	14.2686	1.24227	1.54291	2.09067	0.15967	1.68157	0.804322	954.941	14.9253	947.667	12.881	930.789	25.4983	930.789	25.4983
Tbp SW 52913-57	57.6784	16211.1	1.62009	14.0776	2.76679	1.64077	3.36639	0.167523	1.91767	0.569652	998.45	17.7379	986.008	21.241	958.397	56.558	958.397	56.558
Tbp SW 52913-41	91.543	26743.5	3.07437	13.9072	2.75572	1.61042	3.38786	0.162434	1.97069	0.581692	970.29	17.752	974.272	21.225	983.282	56.1175	983.282	56.1175
Tbp SW 52913-92	182.13	40101.8	3.02669	13.8083	1.10139	1.71185	1.61431	0.171437	1.18022	0.731101	1020.02	11.1344	1012.98	10.3474	997.754	22.3712	997.754	22.3712
Tbp SW 52913-69	72.5	22806	1.31069	13.7625	3.25285	1.76273	3.73806	0.175947	1.84175	0.492702	1044.79	17.7641	1031.85	24.2218	1004.51	66.0501	1004.51	66.0501
Tbp SW 52913-5	339.1	139526	2.2739	13.618	0.543278	1.72586	1.63782	0.170458	1.54509	0.943382	1014.63	14.5056	1018.21	10.5296	1025.88	10.9892	1025.88	10.9892
Tbp SW 52913-12	91.901	41565.1	2.79178	13.5097	2.43133	1.83405	2.77184	0.179704	1.33107	0.480211	1065.36	13.0708	1057.73	18.2158	1042.01	49.0606	1042.01	49.0606
Tbp SW 52913-11	128.879	114594	0.251737	13.5026	1.74878	1.79797	2.15352	0.176075	1.25675	0.583579	1045.5	12.1292	1044.72	14.0523	1043.08	35.3056	1043.08	35.3056
Tbp SW 52913-56	189.346	49392.9	3.47427	13.4975	1.0454	1.83296	1.7589	0.179435	1.41452	0.804208	1063.89	13.8727	1057.34	11.5558	1043.84	21.11	1043.84	21.11
Tbp SW 52913-4	229.267	222720	2.40806	13.461	1.15891	1.79986	2.14698	0.175717	1.80733	0.841801	1043.54	17.4128	1045.41	14.0148	1049.34	23.3808	1049.34	23.3808
Tbp SW 52913-60	112.134	40531.8	2.15704	13.4492	1.92245	1.79827	2.54981	0.175408	1.67503	0.656924	1041.84	16.114	1044.83	16.6395	1051.11	38.7471	1051.11	38.7471
Tbp SW 52913-84	111.784	38010.9	3.68714	13.3862	2.16847	1.82938	3.37838	0.177607	2.59059	0.766816	1053.89	25.1872	1056.06	22.183	1060.56	43.6422	1060.56	43.6422
Tbp SW 52913-30	212.525	62081.3	1.3471	13.3267	1.14623	1.87396	1.88921	0.181126	1.50176	0.794913	1073.13	14.8458	1071.93	12.5087	1069.52	23.0166	1069.52	23.0166
Tbp SW 52913-50	51.4144	21987.7	1.27353	13.2579	1.71142	1.93866	2.46407	0.186412	1.77276	0.719443	1101.91	17.9559	1094.54	16.5072	1079.88	34.3229	1079.88	34.3229
Tbp SW 52913-3	28.9326	14921.5	1.7597	13.2391	3.99502	1.92649	5.16213	0.184979	3.26916	0.633296	1094.12	32.898	1090.32	34.518	1082.76	80.1574	1082.76	80.1574
Tbp SW 52913-42	196.171	89157.5	1.60338	13.2312	0.910353	1.84203	1.76209	0.176764	1.50871	0.856207	1049.27	14.6093	1060.59	11.597	1083.92	18.2562	1083.92	18.2562
Tbp SW 52913-78	277.308	97559.6	2.11053	13.2243	0.566058	1.91692	1.94432	0.183856	1.8601	0.956682	1088	18.6223	1087	12.9748	1085	11.3389	1085	11.3389
Tbp SW 52913-26	70.8009	78933.4	0.627984	13.1634	1.93299	1.88682	3.25199	0.180135	2.61514	0.804167	1067.71	25.7326	1076.47	21.5852	1094.25	38.6971	1094.25	38.6971
Tbp SW 52913-25	172.938	73350.6	3.79576	13.1191	0.938522	1.86459	1.92021	0.177413	1.67523	0.872419	1052.83	16.2723	1068.62	12.6918	1100.97	18.7797	1100.97	18.7797
Tbp SW 52913-13	20.611	28277.7	1.45158	13.1187	7.98856	1.99932	8.12097	0.190226	1.46052	0.179846	1122.6	15.0476	1115.28	55.0202	1101.03	160.021	1101.03	160.021
Tbp SW 52913-65	39.73	13790.5	2.05404	13.0832	3.53458	2.04393	4.40838	0.193945	2.63449	0.59761	1142.71	27.5875	1130.27	30.0654	1106.47	70.6821	1106.47	70.6821
Tbp SW 52913-71	37.1826	12956.8	2.38559	13.0558	4.40926	2.08246	4.74915	0.197188	1.76433	0.371505	1160.19	18.7334	1143.04	32.5892	1110.62	88.1089	1110.62	88.1089
Tbp SW 52913-80	59.0286	36563.9	0.82233	13.0453	5.04283	1.76174	5.83915	0.166684	2.94374	0.504137	993.814	27.1119	1031.49	37.839	1112.23	100.76	1112.23	100.76
Tbp SW 52913-99	47.3951	15039.9	1.42155	12.9443	3.11328	2.13476	4.51822	0.200413	3.27442	0.724714	1177.54	35.2413	1160.13	31.2521	1127.74	62.0343	1127.74	62.0343
Tbp SW 52913-51	63.8286	24479.2	0.90589	12.8183	2.01323	2.16616	3.00415	0.201381	2.22976	0.742226	1182.74	24.0944	1170.25	20.8723	1147.2	40.0047	1147.2	40.0047
Tbp SW 52913-49	132.33	37289.3	2.02775	12.8044	1.61654	2.12328	2.03579	0.197182	1.23744	0.60784	1160.16	13.1386	1156.4	14.0536	1149.35	32.1058	1149.35	32.1058
Tbp SW 52913-59	134.968	50722.1	1.65295	12.7689	0.927313	2.128	3.19686	0.197071	3.05941	0.957005	1159.56	32.4685	1157.94	22.0865	1154.87	18.4018	1154.87	18.4018
Tbp SW 52913-38	74.6118	25397.1	3.4319	12.7668	4.20852	2.18016	4.87881	0.201868	2.46802	0.505866	1185.35	26.7227	1174.73	33.9739	1155.19	83.5246	1155.19	83.5246
Tbp SW 52913-45	81.8961	30472.9	1.0042	12.752	1.11477	2.17352	2.39612	0.201021	2.12101	0.885185	1180.8	22.8852	1172.61	16.6648	1157.49	22.1326	1157.49	22.1326
Tbp SW 52913-72	56.1876	15822.3	2.01511	12.7313	4.3009	2.15881	4.55493	0.199336	1.49989	0.329288	1171.75	16.0703	1167.89	31.6187	1160.72	85.291	1160.72	85.291
Tbp SW 52913-52	95.1341	39764.4	1.84765	12.7014	1.69184	2.16869	2.3917	0.199778	1.69054	0.706837	1174.13	18.1465	1171.06	16.6224	1165.37	33.5342	1165.37	33.5342
Tbp SW 52913-36	151.697	43560.8	1.98471	12.6948	1.2974	2.15228	1.73387	0.198163	1.15024	0.663393	1165.44	12.2634	1165.79	12.021	1166.41	25.708	1166.41	25.708
Tbp SW 52913-70	41.6341	13661.5	0.916158	12.688	3.3972	2.13768	4.64051	0.196713	3.16122	0.681223	1157.64	33.4981	1161.07	32.1125	1167.46	67.3248	1167.46	67.3248
Tbp SW 52913-87	148.666	56943.1	1.27067	12.6764	1.04704	2.21716	2.61667	0.203842	2.39806	0.916453	1195.93	26.1761	1186.48	18.3126	1169.27	20.7468	1169.27	20.7468
Tbp SW 52913-95	76.1721	36951.3	1.79299	12.646	1.2874	2.21973	2.12374	0.203588	1.68904	0.795315	1194.57	18.4177	1187.29	14.8677	1174.06	25.4784	1174.06	25.4784
Tbp SW 52913-75	128.951	42459.9	1.40004	12.6183	0.512255	2.20178	2.60413	0.2015	2.55325	0.980462	1183.37	27.6036	1181.61	18.1854	1178.4	10.1477	1178.4	10.1477
Tbp SW 52913-15	80.1238	62725.4	2.55044	12.6175	2.1259	2.15499	3.07551	0.197204	2.22246	0.72263	1160.29	23.5995	1166.66	21.3333	1178.53	42.0362	1178.53	42.0362
Tbp SW 52913-27	71.5809	34070	1.35949	12.6031	1.38096	2.17282	4.37497	0.198609	4.1513	0.948876	1167.84	44.3436	1172.38	30.4308	1180.79	27.3193	1180.79	27.3193
Tbp SW 52913-47	45.0721	14460.8	1.19485	12.5859	3.69232	2.15172	3.96829	0.196413	1.45398	0.3664	1156.02	15.3874	1165.61	27.5155	1183.48	73.007	1183.48	73.007
Tbp SW 52913-28	74.7217	27436.4	2.49316	12.5831	2.42647	2.10769	2.89528	0.192351	1.57953	0.545552	1134.1	16.4262	1151.32	19.9409	1183.92	47.9534	1183.92	47.9534
Tbp SW 52913-24	68.6984	179586	1.58759	12.4596	3.24996	2.05604	4.1972	0.185794	2.65598	0.632798	1098.55	26.8268	1134.3	28.6799	1203.35	64.0715	1203.35	64.0715
Tbp SW 52913-91	75.0485	24009.1	1.04772	12.4087	1.75004	2.36871	2.43833	0.213175	1.69788	0.696331	1245.71	19.2327	1233.21	17.4106	1211.41	34.4452	1211.41	34.4452
Tbp SW 52913-7	94.8725	42853.2	1.90031	12.1853	1.86265	2.38215	2.71851	0.210525	1.98012	0.728382	1231.62	22.1994	1237.26	19.4442	1247.09	36.4674	1247.09	36.4674
Tbp SW 52913-85	189.119	226521	1.29418	12.1726	0.69066	2.33751	1.77566	0.206366	1.63583	0.921255	1209.43	18.0392	1223.77	12.6282	1249.11	13.5183	1249.11	13.5183
Tbp SW 52913-17	31.7127	12530.5	0.109945	12.1236	2.70776	2.51184	3.46054	0.220864	2.15485	0.622691	1286.44	25.1301	1275.46	25.1374	1257.04	52.9524	1257.04	52.9524
Tbp SW 52913-46	62.9253	27922.1	2.76091	12.062	1.5044	2.48092	1.95213	0.217035	1.24401	0.63726	1266.19	14.3011	1266.48	14.1281	1267	29.3572	1267	29.3572
Tbp SW 52913-93	36.9829	14767.9	2.58434	11.8972	4.06477	2.42774	4.75005	0.209481	2.45776	0.517418	1226.05	27.4413	1250.85	34.1732	1293.78	79.0774	1293.78	79.0774
Tbp SW 52913-31	97.8041	79281.8	2.60495	11.7874	1.22723	2.67629	2.07415	0.228798	1.67213	0.806175	1328.19	20.0706	1321.93	15.333	1311.78	23.8106	1311.78	23.8106
Tbp SW 52913-100	98.5279	43537.2	2.92357	11.7171	0.725582	2.68018	1.52118	0.227762	1.33698	0.87891	1322.76	15.9886	1323	11.2492	1323.39	14.0549	1323.39	14.0549
Tbp SW 52913-14	134.411	67837.7	1.3648	11.6999	1.02483	2.70919	1.98661	0.229891	1.70187	0.856667	1333.93	20.5069	1330.98	14.7345	1326.22	19.8438	1326.22	19.8438
Tbp SW 52913-76	60.5325	25232.1	3.13213	11.5623	1.85231	2.91049	3.24375	0.244068	2.66287	0.820923	1407.81	33.6775	1384.64	24.5187	1349.09	35.7534	1349.09	35.7534
Tbp SW 52913-83	110.144	53059.1	2.9702	11.5432	0.982138	2.77396	2.0166	0.232234	1.76127	0.873387	1346.19	21.3982	1348.55	15.0516	1352.28	18.9481	1352.28	18.9481
Tbp SW 52913-19	88.9752	62753.1	1.28202	11.4939	1.31585	2.71449	1.68085	0.226285	1.04585	0.622212	1315	12.4409	1332.43	12.473	1360.53	25.3574	1360.53	25.3574
Tbp SW 52913-32	252.857	47353	1.33008	11.4572	1.20681	2.7126	3.75948	0.225404	3.56052	0.947078	1310.37	42.2202	1331.91	27.8981	1366.7	23.2352	1366.7	23.2352
Tbp SW 52913-20	72.9982	95538.8	1.43762	11.3466	1.88933	2.7007	4.37505	0.22225	3.94607	0.901949	1293.75	46.2564	1328.65	32.4304	1385.35	36.2846	1385.35	36.2846
Tbp SW 52913-79	65.9858	31545	1.76521	11.3047	1.79237	2.86637	2.19969	0.235011	1.27517	0.579704	1360.71	15.6424	1373.12	16.5599	1392.45	34.3889	1392.45	34.3889
Tbp SW 52913-37	29.9223	15006	2.3263	11.2797	2.21286	2.64531	3.06103	0.216407	2.11498	0.690938	1262.86	24.256	1313.34	22.5585	1396.7	42.4335	1396.7	42.4335
Tbp SW 52913-96	34.1875	24633.5	2.89487	11.0963	4.1956	2.69525	6.9788	0.216909	5.57679	0.799105	1265.52	64.0819	1327.15	51.7298	1428.05	80.1357	1428.05	80.1357
Tbp SW 52913-66	83.636	33153.7	1.70784	11.0337	1.44326	3.18686	2.1735	0.255026	1.62515	0.747712	1464.34	21.2885	1453.98	16.7998	1438.85	27.5151	1438.85	27.5151
Tbp SW 52913-62	93.7035	41035.2	1.99919	10.9847	0.971713	3.21143	1.93944	0.255851	1.67845	0.865431	1468.58	22.0433	1459.92	15.0178	1447.33	18.5036	1447.33	18.5036
Tbp SW 52913-6	50.2655	24432.4	1.70358	10.8985	2.395	3.1454	3.24299	0.248622	2.18655	0.674238	1431.36	28.0665	1443.87	24.9904	1462.33	45.5195	1462.33	45.5195
Tbp SW 52913-8	192.558	283431	2.74275	10.8727	0.723483	3.2276	1.76192	0.254516	1.60653	0.911806	1461.72	21.0111	1463.81	13.6593	1466.82	13.7405	1466.82	13.7405
Tbp SW 52913-89	41.3099	16868.8	0.894501	10.7559	2.79991	3.4155	3.27975	0.266441	1.708	0.520771	1522.71	23.1645	1507.97	25.7654	1487.3	53.0386	1487.3	53.0386
Tbp SW 52913-58	57.5674	27235.1	0.615696	9.86786	1.2886	4.15218	5.66487	0.297165	5.51636	0.973785	1677.23	81.4697	1664.64	46.3881	1648.77	23.8946	1648.77	23.8946
Tbp SW 52913-63	149.75	80342.7	2.15739	9.82289	0.604089	3.62854	2.23337	0.258505	2.15012	0.962725	1482.19	28.4707	1555.81	17.7796	1657.24	11.1882	1657.24	11.1882
Tbp SW 52913-82	136.358	100602	0.617912	9.65058	0.564525	4.34919	3.91026	0.304411	3.86929	0.989524	1713.15	58.2113	1702.74	32.2925	1689.95	10.4136	1689.95	10.4136
Tbp SW 52913-44	111.481	99068.5	2.45571	9.42453	0.676792	4.49124	1.58923	0.30699	1.43791	0.904788	1725.88	21.7723	1729.35	13.1988	1733.55	12.4145	1733.55	12.4145
Tbp SW 52913-34	177.139	106552	2.00049	9.07093	0.489713	4.97545	2.32892	0.327328	2.27685	0.977642	1825.42	36.1961	1815.16	19.6925	1803.39	8.90668	1803.39	8.90668
Tbp SW 52913-23	86.8341	55206.7	0.484265	8.9883	0.78186	5.0167	1.95524	0.327035	1.7921	0.916567	1823.99	28.4706	1822.14	16.5549	1820.01	14.1895	1820.01	14.1895
Tbp SW 52913-68	67.0001	39626.5	1.46519	8.91461	0.989487	5.10883	1.67141	0.33031	1.34704	0.805932	1839.89	21.5611	1837.57	14.194	1834.94	17.9275	1834.94	17.9275
Tbp SW 52913-74	93.8494	69513.6	4.22465	8.90513	0.595306	5.23438	1.58037	0.338068	1.46396	0.92634	1877.37	23.8437	1858.23	13.4736	1836.87	10.783	1836.87	10.783
Tbp SW 52913-54	67.5796	38735.3	0.704124	8.89628	0.843749	5.14846	3.01211	0.332188	2.89152	0.959965	1848.98	46.4806	1844.14	25.6156	1838.67	15.2781	1838.67	15.2781
Tbp SW 52913-53	26.4594	17061.1	5.07991	8.89303	3.14025	5.16334	4.31554	0.333027	2.96018	0.685936	1853.03	47.6743	1846.59	36.7256	1839.33	56.872	1839.33	56.872
Tbp SW 52913-98	52.3492	30073.8	2.47211	8.87627	1.44244	5.25212	2.62895	0.338115	2.19789	0.836036	1877.59	35.8014	1861.12	22.4279	1842.74	26.1063	1842.74	26.1063
Tbp SW 52913-35	141.981	66519.9	1.07473	8.855	0.778381	5.16508	1.30371	0.331714	1.04584	0.802204	1846.69	16.7934	1846.88	11.0909	1847.09	14.0799	1847.09	14.0799
Tbp SW 52913-22	57.6678	77544	2.67496	8.84627	1.49139	5.16741	1.97893	0.331537	1.30075	0.657296	1845.83	20.8781	1847.27	16.8372	1848.87	26.9743	1848.87	26.9743
Tbp SW 52913-97	51.7788	25326.8	2.09284	8.77489	2.07263	5.26422	3.19719	0.335023	2.43439	0.761413	1862.68	39.3821	1863.08	27.2879	1863.51	37.4216	1863.51	37.4216
Tbp SW 52913-1	66.7469	103179	1.11442	5.76543	0.518041	11.7043	0.988263	0.489413	0.841604	0.851599	2568.14	17.8274	2581.04	9.24505	2591.18	8.64047	2591.18	8.64047
Tbp SW 52913-55	41.2921	68589.8	0.640158	5.40976	0.780327	12.7924	3.20231	0.501914	3.10578	0.969857	2622.01	66.9096	2664.48	30.1671	2696.87	12.8866	2696.87	12.8866
Tbp SW 52913-86	55.3037	91808.1	0.767439	5.3898	1.08305	13.1182	1.77548	0.512797	1.40689	0.792398	2668.56	30.743	2688.19	16.7525	2702.97	17.8772	2702.97	17.8772
Tbp SW 52913-10	64.671	63227	0.855894	5.38899	0.441715	13.299	1.72995	0.519785	1.67261	0.966853	2698.27	36.8772	2701.11	16.3386	2703.22	7.29211	2703.22	7.29211
Tbp SW 52913-64	77.1976	96288.5	1.14835	4.69214	0.236613	17.0893	1.94137	0.581559	1.9269	0.992545	2955.11	45.6766	2939.86	18.6248	2929.43	3.82712	2929.43	3.82712
Antelope Butte, Tbc Sandy facies, ANT-71112-1. U-Pb geochronologic analyses.
							Isotope ratios						Apparent ages (Ma)
Analysis	U	206Pb	U/Th	206Pb*	±	207Pb*	±	206Pb*	±	error	206Pb*	±	207Pb*	±	206Pb*	±	Best age	±
	(ppm)	204Pb		207Pb*	(%)	235U*	(%)	238U	(%)	corr.	238U*	(Ma)	235U	(Ma)	207Pb*	(Ma)	(Ma)	(Ma)
ANT711121-44	524.933	5064.31	1.04459	23.5774	25.9253	0.0272588	26.1762	0.00466125	3.61508	0.138106	29.9785	1.08123	27.3076	7.05294	-201.9	659.084	29.9785	1.08123
ANT711121-16	833.235	14995.3	0.908811	21.8225	14.9963	0.0294941	15.1848	0.00466809	2.38518	0.157077	30.0224	0.714425	29.5147	4.41725	-11.6029	363.977	30.0224	0.714425
ANT711121-97	865.969	10275.1	0.777315	19.973	18.5715	0.0323257	18.96	0.00468262	3.81856	0.201401	30.1157	1.1473	32.3036	6.02843	198.123	434.668	30.1157	1.1473
ANT711121-39	319.992	7231.62	2.41719	22.774	28.8891	0.0286534	29.3256	0.00473275	5.04073	0.171888	30.4373	1.53065	28.6852	8.29457	-115.727	724.875	30.4373	1.53065
ANT711121-67	284.73	7203.95	0.96879	32.652	55.4947	0.0200106	55.8643	0.0047388	6.41626	0.114854	30.4761	1.95081	20.1178	11.1285	NA	NA	30.4761	1.95081
ANT711121-29	338.238	3499.27	1.90814	19.1881	25.2474	0.034318	25.4632	0.00477586	3.30856	0.129935	30.7139	1.01377	34.2613	8.57869	290.467	585.058	30.7139	1.01377
ANT711121-35	378.992	2794.97	1.305	17.2334	34.8971	0.0383127	35.6476	0.00478863	7.27655	0.204124	30.7958	2.23553	38.1753	13.3567	530.801	786.819	30.7958	2.23553
ANT711121-48	234.794	4720.66	0.907581	30.8219	43.6955	0.0214319	43.9334	0.00479092	4.56525	0.103913	30.8105	1.40322	21.5317	9.36027	-924.493	1325.58	30.8105	1.40322
ANT711121-25	3058.93	90063.3	0.872679	21.1835	5.349	0.0312009	5.51337	0.00479361	1.3362	0.242355	30.8278	0.410936	31.1967	1.69384	59.7149	127.542	30.8278	0.410936
ANT711121-56	326.104	4398.01	1.047	28.1608	38.7832	0.0237934	39.013	0.0048596	4.22901	0.1084	31.2511	1.31841	23.8764	9.20651	-668.525	1103.84	31.2511	1.31841
ANT711121-65	127.902	2019.99	2.23743	5.60917	365.829	0.119557	366.006	0.00486377	11.3597	0.0310369	31.2778	3.54446	114.67	419.161	2636.92	233.176	31.2778	3.54446
ANT711121-71	370.54	7270.21	2.46048	22.238	27.5601	0.0302742	27.7335	0.00488277	3.09606	0.111636	31.3997	0.969791	30.2838	8.27492	-57.3551	682.716	31.3997	0.969791
ANT711121-19	208.69	3336.78	1.27382	26.0545	42.2048	0.0259298	43.2879	0.00489983	9.6226	0.222293	31.5092	3.0246	25.9931	11.1095	-458.795	1157.89	31.5092	3.0246
ANT711121-47	568.18	8118.97	2.12264	21.5498	12.3324	0.0314291	12.5463	0.00491217	2.3069	0.183871	31.5884	0.726931	31.4214	3.88187	18.6942	297.152	31.5884	0.726931
ANT711121-53	184.412	6088.63	1.00189	17.1565	278.444	0.0397191	278.519	0.00494228	6.45164	0.0231641	31.7815	2.04538	39.5498	108.446	540.582	0	31.7815	2.04538
ANT711121-42	414.664	8034.26	1.22312	21.0922	13.8782	0.0328637	14.293	0.00502732	3.4185	0.239172	32.327	1.10233	32.8326	4.61775	69.9722	331.47	32.327	1.10233
ANT711121-20	583.042	10842	0.990255	21.0675	19.858	0.0334154	20.1095	0.00510574	3.17047	0.15766	32.83	1.03822	33.3749	6.60251	72.7361	476.156	32.83	1.03822
ANT711121-60	448.717	4801.3	1.47711	18.9717	27.9158	0.037272	28.6224	0.00512848	6.32069	0.22083	32.9758	2.07898	37.1571	10.4434	316.312	646.052	32.9758	2.07898
ANT711121-55	407.762	4973.88	1.29991	20.6611	14.4231	0.0342317	15.3052	0.00512956	5.12097	0.334589	32.9827	1.68472	34.1766	5.1438	118.864	341.501	32.9827	1.68472
ANT711121-54	300.139	7243.8	1.08034	23.4708	23.3295	0.0304427	23.6879	0.00518215	4.10504	0.173297	33.32	1.36427	30.4498	7.10597	-190.554	590.132	33.32	1.36427
ANT711121-82	197.404	2847.28	1.01925	21.5326	42.6828	0.033667	43.3829	0.00525774	7.76245	0.178929	33.8048	2.61721	33.6221	14.3483	20.601	1068.6	33.8048	2.61721
ANT711121-40	59.2202	1574.49	0.154693	-9.48702	208.691	-0.0768057	210.663	0.00528472	28.7565	0.136505	33.9778	9.74512	-81.1449	-179.815	NA	NA	33.9778	9.74512
ANT711121-34	126.096	3458.7	1.78481	22.6214	62.5598	0.0323259	62.9132	0.00530356	6.65924	0.105848	34.0986	2.26472	32.3038	20.0061	-99.1819	1699.39	34.0986	2.26472
ANT711121-84	144.148	3001.31	0.652242	20.8758	56.1401	0.0351015	57.1468	0.00531456	10.679	0.18687	34.1692	3.63929	35.0302	19.6797	94.4329	1438.51	34.1692	3.63929
ANT711121-83	290.305	3194.1	1.00849	24.7719	32.4408	0.0296685	33.1	0.00533032	6.5731	0.198583	34.2702	2.24664	29.6867	9.68433	-327.318	852.481	34.2702	2.24664
ANT711121-43	68.2828	1256.15	1.04791	16.0909	79.0565	0.0461089	83.1359	0.00538101	25.7225	0.309403	34.5952	8.87493	45.7709	37.2238	679.152	2092.63	34.5952	8.87493
ANT711121-51	216.37	4941.58	2.58408	30.9819	78.3387	0.024068	78.5734	0.00540813	6.06859	0.0772347	34.7691	2.10431	24.1488	18.7528	-939.619	2717.54	34.7691	2.10431
ANT711121-3	315.697	6518.6	0.68998	27.6469	21.2387	0.0270981	21.4707	0.00543356	3.14825	0.14663	34.9322	1.09678	27.1488	5.75187	-617.997	584.803	34.9322	1.09678
ANT711121-24	663.883	26054.6	0.739355	21.1969	8.10135	0.0355158	8.26551	0.00545999	1.63913	0.19831	35.1016	0.573797	35.4365	2.87849	58.1623	193.394	35.1016	0.573797
ANT711121-22	117.046	1740.01	0.993765	23.1909	41.2824	0.0326709	43.4654	0.00549511	13.6014	0.312925	35.3268	4.79179	32.6431	13.9637	-160.63	1066.17	35.3268	4.79179
ANT711121-86	212.749	3884.53	2.05134	23.2866	34.93	0.0331265	36.3265	0.00559475	9.97554	0.274608	35.9656	3.57777	33.091	11.8276	-170.884	893.57	35.9656	3.57777
ANT711121-99	1228.21	26402.3	0.98631	21.9061	7.75127	0.0354929	8.21499	0.00563903	2.72103	0.331227	36.2494	0.983589	35.4141	2.85912	-20.8401	187.796	36.2494	0.983589
ANT711121-12	111.829	2696.54	1.66977	21.6151	53.1335	0.0365515	54.1001	0.0057301	10.1809	0.188187	36.8332	3.73926	36.4516	19.3729	11.3711	1368.65	36.8332	3.73926
ANT711121-41	46.9778	1341.31	1.13885	-2.4593	448.992	-0.326714	449.389	0.00582745	18.8749	0.0420013	37.4571	7.0495	-401.671	NA	NA	NA	37.4571	7.0495
ANT711121-37	1316.85	5690.74	2.49164	20.5312	4.8904	0.0400787	5.169	0.00596797	1.67407	0.323868	38.3577	0.640228	39.9009	2.02248	133.721	115.004	38.3577	0.640228
ANT711121-37	167.862	3508.81	0.649895	17.6286	27.8754	0.0479922	29.1708	0.00613603	8.59623	0.294686	39.4345	3.37954	47.5972	13.5649	480.871	626.975	39.4345	3.37954
ANT711121-61	715.992	30659.9	5.08342	20.7229	6.50315	0.0420133	6.85125	0.00631446	2.15608	0.314699	40.5777	0.87214	41.7878	2.80488	111.829	153.61	40.5777	0.87214
ANT711121-38	664.072	12802.2	2.40771	21.4736	5.57065	0.0574109	5.7816	0.00894125	1.54752	0.267663	57.3829	0.884073	56.6821	3.18735	27.1455	133.651	57.3829	0.884073
ANT711121-46	191.994	11196.7	2.38044	21.5469	19.1991	0.0994423	19.489	0.0155402	3.34897	0.171839	99.4078	3.3036	96.2614	17.9004	19.0133	464.758	99.4078	3.3036
ANT711121-95	346.862	29478.7	1.22763	19.7384	4.62875	0.181033	5.42958	0.0259161	2.83814	0.522719	164.938	4.62179	168.949	8.45088	225.485	107.045	164.938	4.62179
ANT711121-49	148.033	63108	1.50668	15.2726	1.59955	1.16887	2.93145	0.129473	2.4566	0.838013	784.858	18.1533	786.118	16.0429	789.675	33.5926	784.858	18.1533
ANT711121-81	39.833	47496.7	2.05164	14.1964	7.49171	1.61402	8.15835	0.166182	3.23	0.395913	991.042	29.6716	975.669	51.1917	941.237	153.738	941.237	153.738
ANT711121-1	33.6616	29061.4	0.598466	14.0375	3.96212	1.68649	4.56994	0.171701	2.27728	0.498316	1021.47	21.5125	1003.44	29.1379	964.267	80.9353	964.267	80.9353
ANT711121-91	21.6126	14245.7	1.04093	14.028	10.8185	1.71753	10.8917	0.174742	1.2607	0.115749	1038.19	12.0889	1015.1	70.0071	965.645	221.497	965.645	221.497
ANT711121-6	46.3173	38635.7	2.81636	13.6325	3.10627	1.73498	3.31993	0.171542	1.17175	0.352944	1020.6	11.0603	1021.6	21.3877	1023.73	62.8512	1023.73	62.8512
ANT711121-77	149.594	141895	4.81188	13.6134	0.962009	1.76823	1.15104	0.174584	0.632014	0.549079	1037.32	6.05573	1033.87	7.46564	1026.57	19.4784	1026.57	19.4784
ANT711121-85	48.9035	43650.2	1.17258	13.5945	2.62265	1.82106	3.12644	0.179551	1.70187	0.544348	1064.52	16.7	1053.07	20.4952	1029.38	53.0302	1029.38	53.0302
ANT711121-32	60.06	63256.4	2.07317	13.5072	3.2096	1.8487	3.56771	0.181105	1.55789	0.436664	1073.01	15.3992	1062.97	23.5135	1042.39	64.7735	1042.39	64.7735
ANT711121-2	88.5338	45345.8	2.12016	13.4657	1.91852	1.77891	2.22769	0.173732	1.13222	0.508246	1032.64	10.8034	1037.78	14.4808	1048.64	38.6795	1048.64	38.6795
ANT711121-72	97.4213	47165.4	2.91461	13.3302	1.00034	1.85181	4.50914	0.179032	4.39678	0.975082	1061.69	43.0394	1064.08	29.7389	1069	20.1049	1069	20.1049
ANT711121-73	47.0534	17921	1.89092	13.256	2.49844	1.90182	3.12583	0.182844	1.87847	0.600949	1082.5	18.7188	1081.73	20.8044	1080.16	50.1369	1080.16	50.1369
ANT711121-94	67.1604	34150.7	2.04017	13.2521	1.72294	1.92939	2.22439	0.18544	1.4069	0.632489	1096.63	14.1875	1091.33	14.877	1080.76	34.5496	1080.76	34.5496
ANT711121-9	23.1896	17667.2	1.47509	13.211	8.67994	2.04428	8.96418	0.195873	2.23946	0.249824	1153.11	23.6457	1130.39	61.1958	1087.01	174.292	1087.01	174.292
ANT711121-87	55.4243	38033.8	1.27321	13.201	2.77624	1.96298	3.18196	0.187941	1.55478	0.488624	1110.21	15.8568	1102.9	21.408	1088.5	55.6444	1088.5	55.6444
ANT711121-100	127.542	31814.8	1.00539	13.1709	2.70189	1.97028	11.7554	0.188209	11.4407	0.973228	1111.67	116.833	1105.4	79.3381	1093.08	54.1296	1093.08	54.1296
ANT711121-75	24.4548	18672.5	1.12467	13.1656	8.57618	1.85819	8.72368	0.177431	1.59746	0.183118	1052.93	15.5183	1066.34	57.6494	1093.91	172.026	1093.91	172.026
ANT711121-66	62.2584	71939.8	2.90919	13.017	2.47071	2.05044	2.72676	0.193578	1.1536	0.423067	1140.73	12.0609	1132.44	18.6127	1116.61	49.2934	1116.61	49.2934
ANT711121-15	39.3662	19042	1.06401	12.7886	3.14768	2.09533	3.36765	0.194345	1.19715	0.355485	1144.87	12.5577	1147.27	23.1514	1151.8	62.4929	1151.8	62.4929
ANT711121-21	127.923	23433.3	2.4497	12.7591	1.45323	2.16041	1.82312	0.199919	1.10085	0.60383	1174.89	11.8236	1168.4	12.6549	1156.39	28.851	1156.39	28.851
ANT711121-31	74.9887	78003.2	0.993501	12.7357	2.04048	2.14882	2.34765	0.198483	1.16101	0.494539	1167.16	12.3949	1164.67	16.2687	1160.02	40.4626	1160.02	40.4626
ANT711121-68	91.083	3567.86	2.61201	12.7017	2.08793	2.14385	3.08553	0.197494	2.27179	0.736274	1161.85	24.1529	1163.07	21.3676	1165.33	41.3735	1165.33	41.3735
ANT711121-52	191.552	120887	8.77134	12.6855	1.09587	2.16668	1.4157	0.199343	0.896249	0.63308	1171.79	9.60297	1170.42	9.83568	1167.85	21.7127	1167.85	21.7127
ANT711121-78	33.0035	31359.4	1.12318	12.6784	2.4496	2.19624	3.30707	0.20195	2.22174	0.671817	1185.78	24.0642	1179.85	23.0775	1168.96	48.5094	1168.96	48.5094
ANT711121-14	62.7746	78738.5	1.53537	12.6694	2.86848	2.05284	3.81425	0.18863	2.51403	0.659114	1113.95	25.719	1133.24	26.0487	1170.36	56.8034	1170.36	56.8034
ANT711121-57	308.897	115221	2.49469	12.6204	0.711146	2.21906	1.09306	0.203115	0.830086	0.759418	1192.03	9.03391	1187.07	7.65104	1178.07	14.0715	1178.07	14.0715
ANT711121-96	72.0712	31173	2.11174	12.5999	1.61977	2.18517	1.9965	0.199687	1.1672	0.584622	1173.64	12.524	1176.33	13.9084	1181.29	32.0256	1181.29	32.0256
ANT711121-17	112.016	180734	1.89254	12.4968	1.95845	2.23338	2.28549	0.202423	1.17811	0.515474	1188.32	12.7852	1191.58	16.0306	1197.51	38.6438	1197.51	38.6438
ANT711121-74	128.866	135380	2.27972	12.3011	0.854357	2.36433	1.2348	0.210936	0.891522	0.721996	1233.8	10.0111	1231.89	8.81146	1228.53	16.7543	1228.53	16.7543
ANT711121-89	30.4956	22836.8	1.57977	11.9219	2.58092	2.6916	2.91998	0.23273	1.3657	0.46771	1348.79	16.6211	1326.15	21.6207	1289.74	50.2371	1289.74	50.2371
ANT711121-92	92.229	87771	0.791384	11.7657	1.40174	2.63638	2.46923	0.22497	2.03279	0.823248	1308.08	24.0664	1310.85	18.1793	1315.36	27.1827	1315.36	27.1827
ANT711121-63	198.731	108407	2.15426	11.355	0.381482	2.94314	0.637156	0.24238	0.510333	0.800954	1399.06	6.41821	1393.08	4.82889	1383.93	7.32694	1383.93	7.32694
ANT711121-70	33.6207	39461	1.66275	11.2946	1.74086	2.79495	2.14259	0.228951	1.24904	0.582959	1329	15.0005	1354.19	16.0241	1394.17	33.3929	1394.17	33.3929
ANT711121-27	72.6479	54438.7	1.71258	11.286	1.25232	2.96829	2.64608	0.242965	2.33098	0.880916	1402.09	29.3727	1399.54	20.0999	1395.63	24.0151	1395.63	24.0151
ANT711121-59	85.2075	113432	1.74745	11.252	1.11801	2.94803	1.47724	0.24058	0.965551	0.65362	1389.71	12.0706	1394.34	11.2008	1401.41	21.4224	1401.41	21.4224
ANT711121-58	167.474	126621	2.61897	11.108	0.468833	3.1579	0.828739	0.254408	0.683377	0.824598	1461.17	8.93452	1446.93	6.39113	1426.05	8.9532	1426.05	8.9532
ANT711121-80	142.717	100885	1.98391	11.0251	0.59434	3.23736	1.34963	0.258865	1.21172	0.897816	1484.03	16.0626	1466.15	10.4703	1440.33	11.3281	1440.33	11.3281
ANT711121-30	190.714	7822.26	0.602074	10.9426	0.597214	2.5825	5.53762	0.204954	5.50532	0.994168	1201.88	60.3671	1295.69	40.5544	1454.65	11.3609	1454.65	11.3609
ANT711121-10	124.039	97783.4	1.7412	10.7928	0.85113	3.19329	1.29669	0.24996	0.978254	0.754425	1438.27	12.6109	1455.54	10.0268	1480.82	16.1345	1480.82	16.1345
ANT711121-5	71.6027	120512	1.38534	9.8347	1.36209	4.07967	4.33255	0.290994	4.11287	0.949295	1646.5	59.7635	1650.25	35.3458	1655.01	25.2374	1655.01	25.2374
ANT711121-79	52.0515	94290.8	0.721709	9.81799	1.90812	4.32924	2.69506	0.308271	1.90326	0.706206	1732.19	28.9105	1698.95	22.2338	1658.16	35.3424	1658.16	35.3424
ANT711121-98	107.757	31880.6	3.98414	9.6996	0.977635	3.8795	6.24488	0.272915	6.16788	0.98767	1555.58	85.2527	1609.43	50.4559	1680.6	18.0541	1680.6	18.0541
ANT711121-11	423.149	99423.6	1.002	9.53217	0.250692	4.36923	2.16062	0.302062	2.14603	0.993246	1701.52	32.0939	1706.54	17.8545	1712.68	4.61117	1712.68	4.61117
ANT711121-93	335.116	41182.2	1.98052	9.48302	0.395961	4.18446	4.71656	0.287796	4.69991	0.99647	1630.5	67.7113	1670.98	38.6724	1722.19	7.27452	1722.19	7.27452
ANT711121-23	430.412	471788	6.70128	9.47376	0.201964	4.03712	1.66026	0.277391	1.64793	0.992574	1578.21	23.0689	1641.71	13.512	1723.98	3.70958	1723.98	3.70958
ANT711121-62	56.0545	33184.9	2.37096	9.42576	1.49725	4.51233	1.84333	0.308472	1.07523	0.583307	1733.18	16.3407	1733.25	15.3226	1733.31	27.4685	1733.31	27.4685
ANT711121-33	472.828	273821	2.03947	9.27554	0.480661	3.65589	4.47688	0.245941	4.45101	0.99422	1417.51	56.6397	1561.79	35.7088	1762.72	8.78604	1762.72	8.78604
ANT711121-50	31.0835	66273.2	1.48489	8.83415	1.64966	5.2157	1.95706	0.334177	1.05296	0.53803	1858.6	17.0017	1855.18	16.6762	1851.35	29.8285	1851.35	29.8285
ANT711121-4	72.8213	88489.6	1.81504	8.812	1.12209	5.16386	1.38336	0.330026	0.809071	0.584859	1838.51	12.9418	1846.68	11.7681	1855.88	20.2767	1855.88	20.2767
ANT711121-18	75.488	89697	4.21496	8.79444	0.674306	5.25751	1.06149	0.335341	0.819795	0.772309	1864.22	13.2715	1861.99	9.05595	1859.49	12.1787	1859.49	12.1787
ANT711121-13	75.9352	32281.5	1.30764	8.62384	0.947721	5.49368	1.52054	0.343608	1.18907	0.782001	1904	19.6027	1899.61	13.0625	1894.8	17.0454	1894.8	17.0454
ANT711121-90	69.9058	156852	1.58483	8.56411	1.1528	5.56681	1.64502	0.34577	1.17351	0.713373	1914.37	19.4368	1910.98	14.1606	1907.29	20.7016	1907.29	20.7016
ANT711121-76	71.0796	123972	0.737567	8.18124	0.759153	6.28121	1.55686	0.372702	1.35923	0.873057	2042.1	23.7902	2015.84	13.6379	1989.03	13.5023	1989.03	13.5023
ANT711121-7	34.3458	64807.6	1.5038	5.04817	0.487355	14.7963	0.885782	0.541735	0.739658	0.835035	2790.71	16.7543	2802.23	8.42489	2810.52	7.96651	2810.52	7.96651
Upper Crouse Canyon, Tbc Sandy facies, Tbc-32614-1. U-Pb geochronologic analyses.
							Isotope ratios						Apparent ages (Ma)
Analysis	U	206Pb	U/Th	206Pb*	±	207Pb*	±	206Pb*	±	error	206Pb*	±	207Pb*	±	206Pb*	±	Best age	±
	(ppm)	204Pb		207Pb*	(%)	235U*	(%)	238U	(%)	corr.	238U*	(Ma)	235U	(Ma)	207Pb*	(Ma)	(Ma)	(Ma)
TBC-32614-1-81 <>	56.9252	737.683	1.20077	-1.44526	1330.09	-0.359724	1330.25	0.00377062	20.6635	0.0155335	24.2613	5.0038	-452.714	#NUM!	NA	NA	24.2613	5.0038
TBC-32614-1-29 <>	101.131	2252.8	1.89529	9.69047	277.118	0.0563946	277.36	0.00396352	11.5959	0.0418082	25.5	2.95112	55.7057	151.457	1682.33	725.505	25.5	2.95112
TBC-32614-1-46 <>	157.2	1677.72	0.677401	27.4661	64.8438	0.0201197	65.6007	0.0040079	9.93638	0.151468	25.7849	2.55697	20.2264	13.1381	-600.126	1955.46	25.7849	2.55697
TBC-32614-1-19 <>	459.389	5799.24	1.91531	20.8139	13.7628	0.0273577	13.9393	0.00412983	2.211	0.158616	26.5678	0.586203	27.4053	3.76903	101.449	326.767	26.5678	0.586203
TBC-32614-1-94 <>	737.43	2318.75	0.68286	23.6141	13.0564	0.0242482	13.3747	0.00415288	2.90076	0.216883	26.7157	0.773356	24.3274	3.21507	-205.793	328.646	26.7157	0.773356
TBC-32614-1-66 <>	348.648	2850.69	0.938748	22.2523	12.6906	0.0258388	13.3024	0.00417008	3.98779	0.299779	26.8262	1.06755	25.903	3.40216	-58.9231	310.394	26.8262	1.06755
TBC-32614-1-60 <>	151.402	1682.54	0.941798	28.784	46.0627	0.0201368	46.7532	0.00420377	8.00577	0.171235	27.0425	2.16042	20.2434	9.37099	-729.284	1346.96	27.0425	2.16042
TBC-32614-1-89 <>	314.111	7944.58	0.939593	23.8266	35.1854	0.0243496	35.3019	0.00420778	2.86614	0.0811893	27.0682	0.774185	24.428	8.52084	-228.315	910.56	27.0682	0.774185
TBC-32614-1-27 <>	92.4141	1846.32	1.70924	25.9961	77.5909	0.0225763	78.793	0.00425657	13.711	0.174013	27.3814	3.7463	22.6687	17.6652	-452.871	2436.87	27.3814	3.7463
TBC-32614-1-13 <>	363.83	7280.04	1.87349	20.3481	10.3608	0.0290326	11.2718	0.00428457	4.43935	0.393845	27.5611	1.22092	29.0593	3.2291	154.76	243.147	27.5611	1.22092
TBC-32614-1-98 <>	258.084	1743.67	0.981717	26.5566	45.6619	0.02231	46.2084	0.00429705	7.08589	0.153346	27.6412	1.95443	22.4042	10.2396	-509.448	1274.87	27.6412	1.95443
TBC-32614-1-63 <>	334.145	11917.4	1.9621	22.9955	38.2279	0.0260643	38.3447	0.00434697	2.99026	0.0779836	27.9616	0.834316	26.1262	9.89055	-139.636	977.601	27.9616	0.834316
TBC-32614-1-8 <>	75.1786	1070.4	1.12649	13.7427	102.474	0.0449823	103.716	0.00448343	16.0028	0.154294	28.8375	4.60449	44.6768	45.3627	1007.43	317.792	28.8375	4.60449
TBC-32614-1-20 <>	144.284	3233.22	1.06486	1.03987	2378.42	0.618716	2378.43	0.00466627	6.98782	0.00293799	30.0108	2.09222	489.042	#NUM!	NA	NA	30.0108	2.09222
TBC-32614-1-88 <>	88.5817	2202.1	0.929213	22.1006	80.3882	0.0291816	83.1729	0.00467747	21.3415	0.256592	30.0826	6.40512	29.2064	23.9502	-42.2735	2402.04	30.0826	6.40512
TBC-32614-1-32 <>	149.113	907.603	0.648915	11.2218	34.6645	0.0590625	35.9834	0.00480701	9.65295	0.268261	30.9137	2.97694	58.2669	20.3789	1406.55	684.989	30.9137	2.97694
TBC-32614-1-53 <>	1105.12	11925.5	0.501202	21.9936	5.73827	0.0311379	5.80876	0.00496689	0.902163	0.155311	31.9394	0.287433	31.1346	1.78109	-30.5018	139.201	31.9394	0.287433
TBC-32614-1-80 <>	197.263	2533.77	0.821829	22.6443	29.9211	0.0320378	30.1885	0.00526164	4.00912	0.132803	33.8298	1.35272	32.0204	9.51594	-101.673	749.749	33.8298	1.35272
TBC-32614-1-91 <>	145.724	3268.36	1.00038	20.9357	58.6357	0.0349931	58.9186	0.00531334	5.76646	0.0978718	34.1613	1.96469	34.9238	20.2295	87.6848	1517.46	34.1613	1.96469
TBC-32614-1-15 <>	185.384	3287.83	0.884104	30.3016	45.3409	0.0243107	45.7646	0.00534272	6.21277	0.135755	34.3497	2.12839	24.3894	11.0292	-875.132	1365.51	34.3497	2.12839
TBC-32614-1-83 <>	139.593	2845.13	1.52617	17.9295	31.7544	0.0414469	32.8735	0.00538964	8.50426	0.258697	34.6505	2.93887	41.2357	13.2848	443.358	722.83	34.6505	2.93887
TBC-32614-1-45 <>	374.838	4814.45	0.642956	22.609	15.8057	0.0329572	16.0193	0.00540419	2.60688	0.162734	34.7438	0.903294	32.9246	5.18972	-97.8387	390.236	34.7438	0.903294
TBC-32614-1-5 <>	162.522	2767.51	1.12939	18.7124	16.1263	0.0407243	17.3392	0.0055269	6.37111	0.367439	35.5306	2.25747	40.531	6.88944	347.553	366.784	35.5306	2.25747
TBC-32614-1-85 <>	301.563	4889.5	1.03297	22.1922	17.5354	0.0345199	18.4656	0.00555608	5.78688	0.313388	35.7177	2.06122	34.4596	6.25646	-52.336	429.679	35.7177	2.06122
TBC-32614-1-7 <>	333.586	8136.14	2.39443	20.8022	28.9389	0.0382191	29.2338	0.00576617	4.14188	0.141681	37.0644	1.53076	38.0838	10.9276	102.79	696.922	37.0644	1.53076
TBC-32614-1-61 <>	72.4672	2692.49	1.11433	27.6721	33.6642	0.0657799	34.1418	0.0132018	5.69042	0.16667	84.5475	4.7797	64.6868	21.3996	-620.481	940.798	84.5475	4.7797
TBC-32614-1-93 <>	197.648	6203.36	1.07305	24.8461	12.8671	0.0808236	13.097	0.0145645	2.44287	0.186522	93.2117	2.26066	78.919	9.94484	-335.016	332.287	93.2117	2.26066
TBC-32614-1-28 <>	217.626	35584.9	1.49868	10.4498	5.5443	0.302425	9.5332	0.0229205	7.75517	0.81349	146.087	11.2019	268.292	22.4804	1541.79	104.327	146.087	11.2019
TBC-32614-1-9 <>	210.285	14948.8	1.06097	21.0031	8.21958	0.160129	8.45094	0.0243922	1.96391	0.232389	155.355	3.01456	150.816	11.8445	80.0072	195.439	155.355	3.01456
TBC-32614-1-64 <>	147.218	5488.45	1.73946	19.7949	12.1729	0.178869	12.7048	0.0256795	3.6377	0.286325	163.451	5.8711	167.087	19.5758	218.901	282.616	163.451	5.8711
TBC-32614-1-37 <>	240.239	20542.7	0.936649	21.3583	5.60535	0.178634	5.92105	0.0276712	1.90757	0.322168	175.957	3.31112	166.884	9.11223	40.0894	134.159	175.957	3.31112
TBC-32614-1-86 <>	214.83	17701	1.27919	20.6161	3.99083	0.188695	4.23058	0.028214	1.40395	0.331857	179.361	2.48342	175.515	6.81908	123.991	94.0265	179.361	2.48342
TBC-32614-1-4 <>	1014.41	91662.8	2.50567	19.6519	1.02652	0.251005	2.26785	0.0357755	2.02223	0.891694	226.594	4.50266	227.393	4.62031	235.677	23.6842	226.594	4.50266
TBC-32614-1-10 <>	531.545	178223	1.62844	19.8804	2.27976	0.252156	3.73629	0.0363575	2.96017	0.792273	230.215	6.69451	228.326	7.63994	208.91	52.8621	230.215	6.69451
TBC-32614-1-68 <>	405.984	102159	2.62586	14.2202	1.47543	0.531807	6.58147	0.0548478	6.41396	0.974548	344.216	21.4988	433.008	23.2048	937.761	30.2604	344.216	21.4988
TBC-32614-1-42 <>	162.897	25376.8	0.897877	18.3091	2.88882	0.541772	3.21583	0.071942	1.41289	0.439355	447.845	6.11277	439.592	11.4746	396.58	64.7684	447.845	6.11277
TBC-32614-1-56 <>	109.041	26703.3	1.40919	17.2974	3.35195	0.711909	5.57424	0.0893106	4.45383	0.799002	551.459	23.54	545.879	23.5417	522.634	73.5674	551.459	23.54
TBC-32614-1-31 <>	26.8126	8253.26	0.804221	17.3087	10.1211	0.767326	10.3748	0.0963258	2.28063	0.219823	592.841	12.9174	578.228	45.7687	521.198	222.566	592.841	12.9174
TBC-32614-1-59 <>	167.607	110890	2.2819	13.9665	0.991675	1.56958	1.34736	0.15899	0.912114	0.676965	951.159	8.06597	958.26	8.35687	974.577	20.2338	974.577	20.2338
TBC-32614-1-49 <>	54.0117	33223.2	1.87908	13.8869	2.1519	1.61586	2.563	0.162745	1.39222	0.5432	972.014	12.5618	976.383	16.0769	986.207	43.7984	986.207	43.7984
TBC-32614-1-44 <>	83.6271	37392.5	1.29457	13.7489	1.16946	1.73783	1.65902	0.173291	1.17674	0.709297	1030.22	11.2038	1022.66	10.6929	1006.5	23.7075	1006.5	23.7075
TBC-32614-1-17 <>	62.9921	39830.7	3.21007	13.6871	1.81515	1.73181	2.17248	0.171914	1.1937	0.549463	1022.65	11.2883	1020.42	13.985	1015.64	36.7976	1015.64	36.7976
TBC-32614-1-75 <>	52.5717	24367	0.552734	13.6101	3.02581	1.77004	3.68729	0.17472	2.10726	0.571494	1038.07	20.2044	1034.53	23.9284	1027.06	61.2118	1027.06	61.2118
TBC-32614-1-84 <>	148.305	59445.9	2.24244	13.5652	1.40652	1.77804	1.93416	0.17493	1.32766	0.686425	1039.22	12.7426	1037.46	12.5704	1033.74	28.4385	1033.74	28.4385
TBC-32614-1-73 <>	30.3793	16507.3	1.60936	13.4772	2.47293	1.85108	3.50207	0.180934	2.47974	0.708079	1072.08	24.4919	1063.81	23.0911	1046.92	49.8847	1046.92	49.8847
TBC-32614-1-79 <>	42.7015	30732.6	2.08421	13.4513	2.98385	1.79099	3.12109	0.174726	0.915358	0.293281	1038.1	8.77668	1042.19	20.339	1050.79	60.1307	1050.79	60.1307
TBC-32614-1-65 <>	216.204	260245	1.95392	13.4131	0.564017	1.86787	1.23768	0.181709	1.1017	0.890131	1076.31	10.9206	1069.78	8.1853	1056.51	11.3575	1056.51	11.3575
TBC-32614-1-70 <>	24.5609	7547.18	1.71195	13.2946	4.49237	1.90835	5.31399	0.184006	2.83849	0.534156	1088.82	28.4372	1084.01	35.4191	1074.36	90.2544	1074.36	90.2544
TBC-32614-1-58 <>	400.386	178003	2.33299	13.2282	0.351755	1.86956	0.946125	0.179365	0.878306	0.928319	1063.5	8.611	1070.37	6.25904	1084.42	7.05336	1084.42	7.05336
TBC-32614-1-2 <>	157.178	97153.3	2.76297	13.1518	0.849561	1.91533	1.04659	0.182695	0.611221	0.584013	1081.68	6.08654	1086.44	6.9818	1095.99	16.9864	1095.99	16.9864
TBC-32614-1-69 <>	26.3931	14326.1	1.305	13.0075	5.93856	2.10885	6.28095	0.198948	2.04546	0.325661	1169.66	21.8801	1151.7	43.2877	1118.06	118.592	1118.06	118.592
TBC-32614-1-3 <>	23.1925	13840.8	0.996927	12.9606	5.97988	2.08872	6.4476	0.196338	2.41095	0.37393	1155.62	25.507	1145.1	44.3001	1125.22	119.283	1125.22	119.283
TBC-32614-1-34 <>	141.742	142807	1.3318	12.9448	0.840422	2.0445	1.48374	0.191947	1.22278	0.824116	1131.91	12.6938	1130.46	10.1175	1127.65	16.7446	1127.65	16.7446
TBC-32614-1-54 <>	190.134	97368.6	1.80509	12.7919	1.12158	2.01687	1.3794	0.187116	0.802996	0.582133	1105.73	8.15926	1121.21	9.36385	1151.31	22.2806	1151.31	22.2806
TBC-32614-1-43 <>	254.04	85048.5	3.00007	12.7709	0.577975	2.13033	1.2379	0.197319	1.09468	0.88431	1160.9	11.6296	1158.69	8.55423	1154.55	11.4642	1154.55	11.4642
TBC-32614-1-87 <>	125.736	46294.4	1.43581	12.6455	1.0276	2.18958	1.96068	0.200815	1.66982	0.851653	1179.7	18.0015	1177.73	13.6675	1174.14	20.3527	1174.14	20.3527
TBC-32614-1-51 <>	95.3336	28342.2	1.26915	12.6351	1.46488	2.11429	2.34275	0.19375	1.82828	0.780399	1141.66	19.129	1153.48	16.1509	1175.77	28.9702	1175.77	28.9702
TBC-32614-1-82 <>	38.4525	16233.2	0.849904	12.388	3.15104	2.21632	3.51174	0.199128	1.55024	0.441444	1170.64	16.5953	1186.21	24.5759	1214.7	62.0021	1214.7	62.0021
TBC-32614-1-52 <>	102.343	60011.2	1.4904	12.3231	0.733353	2.28343	1.04393	0.204083	0.742957	0.711692	1197.22	8.11769	1207.18	7.37173	1225.02	14.3983	1225.02	14.3983
TBC-32614-1-12 <>	26.5159	8310.91	1.63988	12.244	9.37259	2.24527	11.5062	0.199384	6.67439	0.580068	1172.01	71.5285	1195.31	81.0028	1237.7	184.142	1237.7	184.142
TBC-32614-1-76 <>	159.467	21500	3.01172	12.2281	0.761189	2.21698	2.84305	0.196617	2.73926	0.963492	1157.12	29.0148	1186.42	19.8968	1240.23	14.9194	1240.23	14.9194
TBC-32614-1-22 <>	314.445	73381.2	2.25262	12.1546	0.658827	2.35172	8.32567	0.207312	8.29956	0.996864	1214.48	91.8774	1228.08	59.383	1252.05	12.8814	1252.05	12.8814
TBC-32614-1-99 <>	116.175	21255.6	0.954719	12.1066	4.35426	2.42633	5.16172	0.213045	2.77196	0.537022	1245.02	31.3836	1250.43	37.1311	1259.77	85.1259	1259.77	85.1259
TBC-32614-1-72 <>	58.4809	45540.9	2.22075	11.6383	1.05147	2.67417	1.70277	0.225723	1.33934	0.786567	1312.04	15.8999	1321.35	12.5845	1336.44	20.3303	1336.44	20.3303
TBC-32614-1-23 <>	70.2917	38191.3	1.98796	11.3042	1.01362	2.95854	3.9182	0.242557	3.78482	0.965959	1399.98	47.6287	1397.04	29.7429	1392.54	19.4457	1392.54	19.4457
TBC-32614-1-16 <>	107.56	64844.6	1.96952	11.2992	0.696788	2.91766	0.94945	0.239101	0.644935	0.679272	1382.02	8.02248	1386.5	7.17988	1393.39	13.3657	1393.39	13.3657
TBC-32614-1-18 <>	37.7331	72218.4	0.582666	10.7063	2.0856	2.98755	2.5869	0.231982	1.53046	0.59162	1344.88	18.5777	1404.45	19.6821	1496.05	39.4575	1496.05	39.4575
TBC-32614-1-14 <>	261.813	151065	1.72125	10.3833	0.333701	3.63075	1.40699	0.273419	1.36685	0.971467	1558.13	18.9189	1556.3	11.2017	1553.79	6.26478	1553.79	6.26478
TBC-32614-1-48 <>	82.066	5097.73	2.20965	10.1997	1.96111	3.70113	2.45815	0.273792	1.48208	0.602923	1560.02	20.5358	1571.61	19.6528	1587.19	36.6567	1587.19	36.6567
TBC-32614-1-41 <>	110.251	66746	1.10449	9.9127	0.781387	3.92202	1.71108	0.281969	1.52224	0.889639	1601.27	21.5837	1618.24	13.845	1640.36	14.5056	1640.36	14.5056
TBC-32614-1-55 <>	66.2607	43602.6	0.720615	9.81539	0.88424	3.98115	1.14846	0.28341	0.732851	0.638118	1608.51	10.4324	1630.36	9.32042	1658.65	16.3749	1658.65	16.3749
TBC-32614-1-39 <>	106.47	49605.9	1.38118	9.74041	0.493358	4.16681	3.35309	0.294361	3.31659	0.989116	1663.28	48.6232	1667.52	27.4639	1672.84	9.12063	1672.84	9.12063
TBC-32614-1-1 <>	114.095	141754	1.66412	9.68889	0.463341	4.22946	1.18924	0.297206	1.09527	0.92098	1677.44	16.1766	1679.76	9.76655	1682.63	8.55501	1682.63	8.55501
TBC-32614-1-33 <>	368.067	324600	1.56634	9.66904	0.174243	4.32162	1.33296	0.30306	1.32152	0.99142	1706.47	19.8134	1697.5	10.9917	1686.42	3.21561	1686.42	3.21561
TBC-32614-1-40 <>	208.245	174829	1.66397	9.64564	0.432203	4.24181	1.95793	0.296743	1.90963	0.975331	1675.14	28.1706	1682.15	16.0891	1690.89	7.97171	1690.89	7.97171
TBC-32614-1-24 <>	317.658	629812	2.31025	9.64522	0.425768	4.25816	0.965429	0.297874	0.866473	0.8975	1680.76	12.8196	1685.31	7.93866	1690.97	7.85294	1690.97	7.85294
TBC-32614-1-36 <>	646.03	194958	2.69667	9.5461	0.0726145	4.40754	0.753968	0.305155	0.750463	0.995351	1716.82	11.3111	1713.76	6.24	1710	1.33611	1710	1.33611
TBC-32614-1-62 <>	194.573	175631	1.10226	9.53508	0.287503	4.45603	1.10876	0.308156	1.07084	0.965797	1731.63	16.2613	1722.82	9.195	1712.12	5.28865	1712.12	5.28865
TBC-32614-1-67 <>	84.5002	97846.8	0.804992	9.5094	0.573046	4.45899	1.38038	0.307531	1.25581	0.909759	1728.54	19.0406	1723.37	11.4491	1717.08	10.5347	1717.08	10.5347
TBC-32614-1-25 <>	128.156	161329	1.6242	9.50722	0.466228	4.32367	1.52212	0.29813	1.44896	0.951934	1682.03	21.4518	1697.89	12.5529	1717.5	8.57051	1717.5	8.57051
TBC-32614-1-26 <>	79.5487	211626	0.548133	9.48908	0.818866	4.38945	2.34833	0.302088	2.20094	0.937234	1701.65	32.9171	1710.36	19.4226	1721.01	15.0465	1721.01	15.0465
TBC-32614-1-95 <>	343.034	37783.7	1.2744	9.48316	0.182276	4.06322	1.01224	0.279462	0.995696	0.983653	1588.65	14.0198	1646.95	8.24836	1722.16	3.34874	1722.16	3.34874
TBC-32614-1-37 <>	273.064	143390	1.08958	9.4553	0.266107	4.49238	2.17101	0.308071	2.15464	0.99246	1731.21	32.7126	1729.56	18.0324	1727.56	4.88553	1727.56	4.88553
TBC-32614-1-90 <>	113.551	92253.2	2.60089	9.34987	0.3272	4.60821	0.983234	0.31249	0.927195	0.943005	1752.95	14.2308	1750.76	8.2036	1748.12	5.9918	1748.12	5.9918
TBC-32614-1-71 <>	47.8022	99730.1	2.31575	9.33103	0.901799	4.65451	3.57239	0.314994	3.45669	0.967614	1765.24	53.3786	1759.1	29.8671	1751.81	16.5049	1751.81	16.5049
TBC-32614-1-11 <>	176.484	138033	1.00939	9.31768	0.455058	4.69047	2.14439	0.316974	2.09555	0.977224	1774.93	32.5137	1765.54	17.9493	1754.43	8.32664	1754.43	8.32664
TBC-32614-1-35 <>	277.177	393012	0.643266	8.71329	0.23729	5.24486	0.674728	0.331447	0.631626	0.936119	1845.39	10.1361	1859.94	5.75406	1876.22	4.27771	1876.22	4.27771
TBC-32614-1-74 <>	168.223	349010	2.75893	8.22833	0.589926	5.90414	3.15696	0.352344	3.10135	0.982386	1945.78	52.0904	1961.84	27.419	1978.81	10.5065	1978.81	10.5065
BROWNS PARK FORMATION SAMPLES
Taylor Flat, Tbp-32914-1. U-Pb geochronologic analyses.
							Isotope ratios						Apparent ages (Ma)
Analysis	U	206Pb	U/Th	206Pb*	±	207Pb*	±	206Pb*	±	error	206Pb*	±	207Pb*	±	206Pb*	±	Best age	±
	(ppm)	204Pb		207Pb*	(%)	235U*	(%)	238U	(%)	corr.	238U*	(Ma)	235U	(Ma)	207Pb*	(Ma)	(Ma)	(Ma)
TBP-32914-1-54 <>	119.513	716.707	0.942618	4.04426	210.943	0.03971	215.188	0.00116476	42.5284	0.197634	7.50418	3.18955	39.5409	83.6403	3167.32	592.571	7.50418	3.18955
TBP-32914-1-38 <>	342.303	368.162	1.19706	18.552	46.0527	0.0089991	46.8473	0.00121084	8.59198	0.183404	7.80088	0.669845	9.09667	4.24254	366.96	1092.94	7.80088	0.669845
TBP-32914-1-41 <>	149.335	481.24	1.20597	6.59295	102.099	0.0264681	108.747	0.00126561	37.4374	0.344263	8.15351	3.05053	26.5257	28.4798	2364.91	534.942	8.15351	3.05053
TBP-32914-1-23 <>	246.992	631.283	1.38861	5.82704	127.242	0.0299967	128.241	0.00126771	15.9775	0.12459	8.16701	1.30405	30.0103	37.9399	2573.43	541.202	8.16701	1.30405
TBP-32914-1-87 <>	404.103	2002.48	0.991343	15.8344	48.9375	0.0111598	49.8105	0.00128161	9.2849	0.186404	8.25647	0.766114	11.2687	5.582	713.431	1106.24	8.25647	0.766114
TBP-32914-1-7 <>	153.652	509.746	1.21101	4.69757	288.539	0.0376355	290.07	0.00128224	29.7617	0.102602	8.26056	2.45691	37.5129	107.225	2927.56	201.797	8.26056	2.45691
TBP-32914-1-35 <>	678.167	1039.57	0.937532	23.8953	43.4113	0.00748703	44.6968	0.00129754	10.6423	0.238101	8.35904	0.88902	7.57388	3.3727	-235.574	1142.45	8.35904	0.88902
TBP-32914-1-91 <>	1225.97	6771.14	1.07172	21.5679	35.1047	0.00849341	36.0881	0.00132858	8.36715	0.231854	8.55892	0.715662	8.58764	3.08605	16.6254	866.955	8.55892	0.715662
TBP-32914-1-42 <>	91.1039	290.377	1.13316	1.15345	629.727	0.161826	631.337	0.00135377	45.0622	0.0713758	8.72109	3.92726	152.3	1394.07	NA	NA	8.72109	3.92726
TBP-32914-1-31 <>	177.549	1392.28	0.936261	3.2878	437.686	0.0569227	437.913	0.00135734	14.1017	0.0322021	8.74406	1.23223	56.2132	244.069	3491.5	237.351	8.74406	1.23223
TBP-32914-1-4 <>	157.135	845.547	0.848373	20.7367	112.485	0.00923134	113.718	0.00138837	16.706	0.146906	8.94377	1.49311	9.33035	10.5621	110.232	1057.91	8.94377	1.49311
TBP-32914-1-43 <>	139.859	528.809	0.961773	12.6123	143.755	0.0156503	145.049	0.00143157	19.327	0.133245	9.22191	1.78105	15.768	22.6984	1179.35	458.518	9.22191	1.78105
TBP-32914-1-50 <>	112.218	452.05	1.53491	-1.11774	638.191	-0.179503	639.128	0.00145516	34.5973	0.0541321	9.37374	3.24071	-200.889	NA	NA	NA	9.37374	3.24071
TBP-32914-1-45 <>	73.6152	264.39	1.30383	2.57179	172.063	0.0783254	176.912	0.00146096	41.1393	0.232541	9.41107	3.86882	76.5693	131.204	3866.45	1131.44	9.41107	3.86882
TBP-32914-1-8 <>	115.885	482.897	1.12181	1.25035	952.736	0.162945	953.726	0.00147764	43.4558	0.0455642	9.51847	4.13327	153.278	NA	NA	NA	9.51847	4.13327
TBP-32914-1-98 <>	190.274	589.056	1.74359	10.2754	166.716	0.0215766	168.213	0.00160797	22.391	0.133111	10.3573	2.31725	21.6755	36.0898	1573.37	297.09	10.3573	2.31725
TBP-32914-1-20 <>	335.908	6645.37	0.478145	23.9386	24.0099	0.032108	24.4941	0.00557455	4.84655	0.197866	35.8361	1.732	32.0894	7.73728	-240.146	613.707	35.8361	1.732
TBP-32914-1-100 <>	589.62	33058.3	0.984656	21.4488	10.4103	0.0375393	10.6996	0.00583966	2.47105	0.230949	37.5354	0.924824	37.4187	3.93078	29.9546	250.062	37.5354	0.924824
TBP-32914-1-32 <>	282.739	6063.93	1.42459	27.0168	23.0561	0.0469921	23.4137	0.00920784	4.07597	0.174085	59.0859	2.39732	46.6278	10.6708	-555.495	627.62	59.0859	2.39732
TBP-32914-1-94 <>	196.659	9409.23	0.740619	22.7377	17.2984	0.0729018	17.5049	0.0120222	2.6806	0.153135	77.038	2.05279	71.4494	12.0778	-111.804	428.679	77.038	2.05279
TBP-32914-1-47 <>	296.776	16053	1.59148	21.9035	9.76386	0.0944515	9.95355	0.0150045	1.93394	0.194296	96.0065	1.84295	91.6417	8.72229	-20.5531	236.74	96.0065	1.84295
TBP-32914-1-1 <>	317.329	22152.5	1.45572	21.6249	8.1501	0.0987475	8.48532	0.0154874	2.36147	0.2783	99.0733	2.3217	95.6195	7.74346	10.3003	196.332	99.0733	2.3217
TBP-32914-1-25 <>	273.611	20441.9	2.46796	19.8743	5.16226	0.121614	5.72737	0.0175297	2.4807	0.433131	112.024	2.75499	116.534	6.30565	209.62	119.739	112.024	2.75499
TBP-32914-1-52 <>	85.1839	9609.79	1.34929	21.9166	14.0471	0.171837	14.2202	0.0273143	2.21168	0.155531	173.717	3.79076	161.012	21.1762	-22.0057	341.421	173.717	3.79076
TBP-32914-1-39 <>	109.573	3517.69	1.53821	15.748	17.0633	0.356806	32.2299	0.0407526	27.3425	0.848358	257.497	69.0211	309.827	86.2674	725.006	364.333	257.497	69.0211
TBP-32914-1-40 <>	323.099	59548.1	2.91051	18.2878	1.47796	0.494911	1.98824	0.0656427	1.32995	0.668905	409.851	5.28114	408.252	6.68371	399.196	33.1216	409.851	5.28114
TBP-32914-1-83 <>	105.198	59752.9	2.54569	13.661	0.824194	1.74647	1.17009	0.173038	0.830546	0.709816	1028.83	7.89791	1025.86	7.55513	1019.5	16.6885	1019.5	16.6885
TBP-32914-1-73 <>	122.322	93113.5	2.00833	13.4913	1.18945	1.84826	2.68326	0.180848	2.40521	0.896379	1071.61	23.7462	1062.81	17.6815	1044.77	24.0124	1044.77	24.0124
TBP-32914-1-96 <>	303.086	183754	2.53842	13.457	0.644133	1.83303	1.21865	0.178903	1.03451	0.848894	1060.98	10.1203	1057.37	8.00639	1049.93	13.0018	1049.93	13.0018
TBP-32914-1-36 <>	79.1126	52716.2	1.54608	13.3206	1.60146	1.87839	2.3671	0.181471	1.74312	0.736396	1075.01	17.2597	1073.5	15.6862	1070.44	32.198	1070.44	32.198
TBP-32914-1-78 <>	95.5521	69488.4	2.3703	13.2073	1.29284	1.92829	3.4417	0.184708	3.18965	0.926765	1092.64	32.0581	1090.95	23.0163	1087.54	25.8933	1087.54	25.8933
TBP-32914-1-12 <>	57.3876	27504.8	1.53366	13.1884	1.67608	1.93649	3.54454	0.185228	3.12322	0.881135	1095.47	31.465	1093.79	23.7386	1090.41	33.562	1090.41	33.562
TBP-32914-1-5 <>	190.567	92323.7	6.97279	13.1172	0.994165	1.95983	1.70366	0.186448	1.3835	0.812079	1102.11	14.0155	1101.82	11.4547	1101.25	19.899	1101.25	19.899
TBP-32914-1-24 <>	49.6839	36812.8	1.82188	12.6866	2.29502	2.176	2.66586	0.200218	1.35635	0.508785	1176.49	14.5859	1173.4	18.5479	1167.68	45.4638	1167.68	45.4638
TBP-32914-1-9 <>	52.2937	38915.9	1.82288	12.641	1.48914	2.18338	2.21872	0.200174	1.64474	0.741302	1176.25	17.684	1175.76	15.4528	1174.85	29.4463	1174.85	29.4463
TBP-32914-1-58 <>	183.327	82024.5	2.583	12.6013	0.866174	2.18799	1.01068	0.199968	0.520783	0.51528	1175.15	5.59455	1177.23	7.04334	1181.07	17.1381	1181.07	17.1381
TBP-32914-1-57 <>	102.728	92352.7	1.09554	12.5243	1.34906	2.17703	1.53278	0.197751	0.727639	0.474718	1163.23	7.74437	1173.73	10.6652	1193.17	26.6349	1193.17	26.6349
TBP-32914-1-70 <>	49.6633	45451.2	2.01101	12.4167	1.79466	2.16631	2.19745	0.195086	1.26807	0.577062	1148.87	13.3441	1170.3	15.2668	1210.14	35.3293	1210.14	35.3293
TBP-32914-1-59 <>	75.4173	68499.8	0.526646	10.7628	1.73995	3.39839	2.14191	0.265275	1.24914	0.58319	1516.77	16.8827	1504.02	16.8055	1486.09	32.9607	1486.09	32.9607
TBP-32914-1-16 <>	466.215	96313.3	2.8062	10.468	0.981171	1.06688	7.66628	0.0809982	7.60323	0.991776	502.078	36.7258	737.208	40.2014	1538.52	18.4577	1538.52	18.4577
TBP-32914-1-84 <>	109.442	38996.2	0.665352	10.0767	0.689844	3.8695	2.28921	0.282794	2.1828	0.953515	1605.42	31.0205	1607.34	18.4729	1609.85	12.8549	1609.85	12.8549
TBP-32914-1-74 <>	38.8407	32532.7	0.833836	9.9657	1.33729	4.04896	2.7218	0.292651	2.37062	0.870976	1654.77	34.5983	1644.09	22.1665	1630.45	24.856	1630.45	24.856
TBP-32914-1-63 <>	178.315	815057	2.34876	9.78835	0.818812	3.99041	3.38853	0.283286	3.28812	0.970366	1607.89	46.7924	1632.25	27.5188	1663.76	15.1532	1663.76	15.1532
TBP-32914-1-34 <>	88.1164	81674.7	1.31198	9.75599	0.537242	4.18484	1.34032	0.296107	1.22793	0.916151	1671.98	18.0843	1671.05	10.9849	1669.88	9.93396	1669.88	9.93396
TBP-32914-1-22 <>	288.911	187554	6.9829	9.69503	0.2597	4.24957	2.56294	0.298808	2.54974	0.994853	1685.4	37.8153	1683.65	21.0693	1681.46	4.79574	1681.46	4.79574
TBP-32914-1-99 <>	91.1507	61971.4	4.08868	9.25	0.527081	4.77991	1.58784	0.320671	1.4978	0.943297	1793.01	23.4445	1781.38	13.334	1767.76	9.62851	1767.76	9.62851
TBP-32914-1-56 <>	148.073	18882.3	1.58935	9.19778	0.528686	4.61422	2.54746	0.307808	2.49199	0.978228	1729.91	37.8099	1751.84	21.2622	1778.09	9.64371	1778.09	9.64371
TBP-32914-1-19 <>	32.9461	38464.9	1.22902	9.1353	1.2531	4.74928	1.70619	0.314666	1.15794	0.678669	1763.62	17.8665	1775.98	14.312	1790.52	22.826	1790.52	22.826
TBP-32914-1-66 <>	47.4429	20221.6	1.15062	9.10994	0.897428	4.87407	1.60281	0.322037	1.32801	0.828553	1799.67	20.8537	1797.78	13.5048	1795.58	16.3361	1795.58	16.3361
TBP-32914-1-95 <>	247.486	416868	1.94747	8.70323	0.21367	5.43286	1.4447	0.342932	1.42881	0.989002	1900.76	23.5205	1890.05	12.3894	1878.3	3.85093	1878.3	3.85093
TBP-32914-1-92 <>	381.973	79731.7	2.84036	8.30557	0.188882	6.16631	2.0745	0.371444	2.06588	0.995846	2036.19	36.0698	1999.69	18.1267	1962.16	3.36845	1962.16	3.36845
TBP-32914-1-71 <>	7.04896	17181.7	0.693837	5.96107	4.61087	10.9918	5.84753	0.475218	3.59632	0.615015	2506.4	74.6848	2522.44	54.4758	2535.36	77.3872	2535.36	77.3872
TBP-32914-1-93 <>	236.95	131259	2.9017	5.72232	0.16494	12.232	1.93465	0.507653	1.92761	0.996359	2646.6	41.8416	2622.36	18.1614	2603.69	2.74879	2603.69	2.74879
TBP-32914-1-69 <>	280.694	214924	1.45432	5.60154	0.143571	12.5405	2.04143	0.509473	2.03638	0.997524	2654.38	44.3077	2645.77	19.1998	2639.18	2.38443	2639.18	2.38443
TBP-32914-1-46 <>	297.743	19394.8	1.22662	5.60051	0.208196	11.7447	2.76379	0.477056	2.75594	0.997159	2514.43	57.3814	2584.27	25.8667	2639.49	3.45444	2639.49	3.45444
TBP-32914-1-27 <>	631.735	74536.5	0.548562	5.59574	0.272591	13.0768	7.99071	0.530711	7.98606	0.999418	2744.45	178.536	2685.21	75.5114	2640.9	4.52335	2640.9	4.52335
TBP-32914-1-28 <>	183.434	133310	1.43808	5.51926	0.1749	13.0146	2.65819	0.520968	2.65243	0.997833	2703.28	58.5687	2680.71	25.07	2663.72	2.89805	2663.72	2.89805
TBP-32914-1-75 <>	52.3545	178878	0.606595	5.41782	0.555565	13.4121	1.17271	0.527012	1.03276	0.880663	2728.85	22.9773	2709.11	11.0817	2694.41	9.17593	2694.41	9.17593
TBP-32914-1-65 <>	116.201	323466	1.64227	5.28318	0.186062	13.8077	1.04622	0.529072	1.02954	0.984059	2737.54	22.9642	2736.61	9.90604	2735.9	3.05887	2735.9	3.05887
TBP-32914-1-82 <>	212.47	142038	2.93961	5.27083	0.269317	13.8366	1.07308	0.528942	1.03873	0.967993	2736.99	23.1655	2738.59	10.1618	2739.75	4.42764	2739.75	4.42764
TBP-32914-1-15 <>	39.8637	58858.6	1.27966	5.23001	0.44164	14.2009	1.87806	0.538665	1.82539	0.971957	2777.86	41.196	2763.22	17.8168	2752.53	7.2576	2752.53	7.2576
TBP-32914-1-64 <>	983.817	133451	1.19209	4.44515	0.0442054	18.8754	1.71978	0.608527	1.71922	0.99967	3064.1	41.9282	3035.47	16.5853	3016.55	0.709704	3016.55	0.709704
John Weller Mesa, Tbp-7912-2. U-Pb geochronologic analyses.
							Isotope ratios						Apparent ages (Ma)
Analysis	U	206Pb	U/Th	206Pb*	±	207Pb*	±	206Pb*	±	error	206Pb*	±	207Pb*	±	206Pb*	±	Best age	±
	(ppm)	204Pb		207Pb*	(%)	235U*	(%)	238U	(%)	corr.	238U*	(Ma)	235U	(Ma)	207Pb*	(Ma)	(Ma)	(Ma)
TBP79122-99	922.309	23563.8	0.887939	21.5362	13.6958	0.0186776	14.1597	0.00291735	3.59496	0.253886	18.7791	0.674117	18.79	2.63615	20.1802	330.15	18.7791	0.674117
TBP79122-44	183.028	4233.97	1.17295	36.6162	102.84	0.0149556	103.263	0.00397169	9.34175	0.0904652	25.5525	2.38232	15.0732	15.4514	NA	NA	25.5525	2.38232
TBP79122-1	87.2322	1624.8	0.78032	7.59142	107.832	0.0769674	109.096	0.00423768	16.5557	0.151753	27.2602	4.50357	75.2898	79.3276	2121.11	360.522	27.2602	4.50357
TBP79122-86	367.067	4275.13	0.415337	24.4944	35.7002	0.0258757	36.5539	0.00459682	7.85393	0.214859	29.5651	2.3167	25.9395	9.36209	-298.456	937.465	29.5651	2.3167
TBP79122-71	144.05	2287.03	1.25532	15.6182	42.2524	0.0408941	42.8688	0.00463224	7.24346	0.168968	29.7924	2.15302	40.6966	17.1028	742.53	934.442	29.7924	2.15302
TBP79122-98	166.881	3192.81	1.00883	16.0567	28.3466	0.0412015	32.0838	0.0047981	15.028	0.468399	30.8566	4.62606	40.9964	12.8919	683.727	616.881	30.8566	4.62606
TBP79122-48	199.843	1847.91	1.92266	25.7838	41.5892	0.0260589	41.884	0.00487305	4.96041	0.118432	31.3374	1.55069	26.1208	10.8013	-431.302	1133.32	31.3374	1.55069
TBP79122-47	230.629	7323.89	1.35493	10.0809	218.579	0.0674567	218.75	0.00493198	8.64959	0.039541	31.7154	2.73652	66.2831	141.268	1609.07	522.989	31.7154	2.73652
TBP79122-76	249.889	5337.99	1.20361	31.6353	41.6114	0.0220578	41.8128	0.00506096	4.09822	0.0980137	32.5428	1.33031	22.1537	9.16299	-1001.08	1278.53	32.5428	1.33031
TBP79122-81	110.776	2037.57	0.961102	13.4498	53.243	0.0537914	56.835	0.00524718	19.8845	0.349863	33.7371	6.69091	53.2005	29.4663	1051.02	1160.31	33.7371	6.69091
TBP79122-60	291.801	1455.84	0.568571	20.8827	29.614	0.0365372	30.009	0.00553378	4.85322	0.161725	35.5747	1.72176	36.4376	10.7411	93.6842	715.051	35.5747	1.72176
TBP79122-14	156.905	2480.44	0.553638	16.1238	40.494	0.0493247	40.9399	0.00576806	6.02632	0.147199	37.0765	2.22793	48.8875	19.5427	674.791	901.638	37.0765	2.22793
TBP79122-24	389.581	9498.85	0.756756	20.0718	13.2824	0.0461685	13.6332	0.00672093	3.07292	0.225399	43.181	1.32248	45.8287	6.10911	186.64	310.382	43.181	1.32248
TBP79122-64	171.836	8541.1	1.38027	18.4944	19.8656	0.0563104	21.4495	0.00755312	8.08933	0.377134	48.5076	3.90921	55.6248	11.6108	373.968	451.099	48.5076	3.90921
TBP79122-36	122.623	2805.97	0.831962	23.4684	19.4589	0.0512892	20.667	0.00872988	6.9623	0.336881	56.0322	3.88423	50.7866	10.2382	-190.299	490.457	56.0322	3.88423
TBP79122-91	547.665	15930.8	1.01431	21.4302	10.0091	0.0575249	10.5644	0.00894088	3.38002	0.319944	57.3805	1.93087	56.7916	5.83506	32.0414	240.31	57.3805	1.93087
TBP79122-78	57.1348	2436.27	1.29024	5.21362	719.934	0.255751	720.061	0.00967064	13.5197	0.0187757	62.0414	8.34758	231.237	#NUM!	2757.69	1000.35	62.0414	8.34758
TBP79122-9	284.563	20357.5	1.48679	22.9144	12.0175	0.0831286	12.1809	0.0138152	1.98815	0.163219	88.4492	1.74649	81.0821	9.49272	-130.903	297.929	88.4492	1.74649
TBP79122-40	162.313	16259.9	1.57521	19.3402	20.4646	0.104718	20.9403	0.0146885	4.43788	0.21193	93.9997	4.14133	101.122	20.1575	272.401	473.373	93.9997	4.14133
TBP79122-57	70.6077	2509.11	0.510151	10.7222	180.174	0.196573	180.293	0.0152865	6.53448	0.0362438	97.7975	6.34233	182.222	310.029	1493.24	425.14	97.7975	6.34233
TBP79122-94	122.007	9022.95	1.48437	19.6637	16.158	0.108233	16.8005	0.0154357	4.60173	0.273904	98.7445	4.50933	104.348	16.6618	234.29	375.003	98.7445	4.50933
TBP79122-26	109.216	4726.56	0.928198	21.2657	16.2573	0.103009	16.9155	0.0158874	4.67261	0.276232	101.611	4.71068	99.5498	16.0415	50.4297	390.333	101.611	4.71068
TBP79122-80	74.1205	9780.53	1.26556	19.1546	15.8774	0.181733	16.5301	0.0252467	4.59918	0.27823	160.73	7.30088	169.55	25.8174	294.466	364.473	160.73	7.30088
TBP79122-88	92.3517	10040.2	0.623245	20.3541	15.7582	0.171654	15.8891	0.0253399	2.03543	0.128102	161.316	3.24272	160.853	23.6409	154.025	371.005	161.316	3.24272
TBP79122-28	176.712	17467.4	0.873248	20.8213	8.17388	0.171816	8.72508	0.025946	3.052	0.349796	165.126	4.97564	160.994	12.9905	100.628	193.582	165.126	4.97564
TBP79122-6	68.8348	5081.48	1.24041	20.5801	16.5073	0.180227	17.2552	0.0269008	5.02481	0.291206	171.122	8.48546	168.256	26.7611	128.154	390.716	171.122	8.48546
TBP79122-73	355.883	38390.7	2.52858	20.4474	2.50215	0.185865	3.07072	0.0275635	1.78005	0.579684	175.281	3.07805	173.095	4.88692	143.321	58.718	175.281	3.07805
TBP79122-12	169.795	22908.3	1.04684	20.192	9.74524	0.189606	9.85073	0.0277671	1.43778	0.145957	176.558	2.50407	176.293	15.9435	172.721	227.883	176.558	2.50407
TBP79122-3	400.915	53565.4	2.04447	19.2375	3.15741	0.251407	3.42269	0.0350772	1.32119	0.38601	222.246	2.88626	227.719	6.98205	284.594	72.2237	222.246	2.88626
TBP79122-41	160.048	27378.7	2.18189	20.9675	6.18958	0.232036	6.3282	0.0352859	1.31726	0.208157	223.546	2.89421	211.878	12.1022	84.0413	146.969	223.546	2.89421
TBP79122-2	141.114	24166.3	1.80469	20.5423	7.97468	0.246789	8.48438	0.0367683	2.89639	0.34138	232.77	6.62167	223.964	17.0539	132.464	187.753	232.77	6.62167
TBP79122-93	145.421	26848.7	1.70143	20.7206	6.09762	0.290059	6.69455	0.0435901	2.76332	0.412771	275.048	7.44058	258.606	15.2848	112.067	144.027	275.048	7.44058
TBP79122-46	119.918	35241.5	1.13856	18.0795	5.9535	0.411611	6.19603	0.0539725	1.71658	0.277045	338.865	5.66665	350.035	18.3469	424.804	132.914	338.865	5.66665
TBP79122-82	101.317	76144.4	1.53006	13.7277	1.55076	1.76631	2.62378	0.175859	2.11644	0.80664	1044.31	20.405	1033.17	17.0123	1009.63	31.4368	1009.63	31.4368
TBP79122-62	113.501	80913.8	2.00161	13.6738	1.33786	1.6812	2.43719	0.166728	2.03716	0.835865	994.057	18.7665	1001.44	15.5183	1017.6	27.0784	1017.6	27.0784
TBP79122-96	43.8431	48443	0.777397	13.6109	3.77238	1.76619	5.04411	0.174351	3.34847	0.663838	1036.04	32.0475	1033.12	32.713	1026.94	76.3147	1026.94	76.3147
TBP79122-97	73.5039	20646.1	2.81292	13.367	1.36306	1.8419	2.12805	0.178567	1.63422	0.767942	1059.14	15.9616	1060.54	14.0055	1063.45	27.4185	1063.45	27.4185
TBP79122-79	109.509	85567.1	1.67042	13.3438	1.39574	1.81656	1.81697	0.175804	1.16331	0.640249	1044.01	11.2127	1051.45	11.8995	1066.94	28.0794	1066.94	28.0794
TBP79122-53	17.8776	20732.4	0.88941	13.2742	6.24122	2.04767	6.93848	0.197137	3.03143	0.436902	1159.92	32.1806	1131.52	47.3698	1077.45	125.394	1077.45	125.394
TBP79122-72	39.2742	42096.2	2.46678	13.1279	3.43553	2.02404	3.5446	0.192714	0.872549	0.246163	1136.06	9.08835	1123.62	24.0941	1099.65	68.7516	1099.65	68.7516
TBP79122-17	58.4846	65229.4	2.00807	13.0517	1.67803	1.94725	2.4046	0.184327	1.7223	0.716253	1090.57	17.28	1097.5	16.1329	1111.25	33.5262	1111.25	33.5262
TBP79122-50	36.2075	49267	2.0936	12.9189	2.43086	2.03524	2.78969	0.190695	1.36867	0.490619	1125.14	14.1305	1127.37	18.9958	1131.67	48.4272	1131.67	48.4272
TBP79122-54	136.396	117322	0.739369	12.8398	1.04153	2.08343	1.81892	0.194016	1.4912	0.819829	1143.09	15.62	1143.37	12.4799	1143.88	20.69	1143.88	20.69
TBP79122-63	33.0161	35897.4	1.18082	12.7272	2.66416	2.14954	4.03306	0.198416	3.02784	0.750756	1166.81	32.3166	1164.91	27.9559	1161.35	52.8245	1161.35	52.8245
TBP79122-33	105.376	96488.9	1.75378	12.6283	1.97614	2.18494	2.15351	0.200116	0.855856	0.397423	1175.94	9.19978	1176.25	15.0019	1176.84	39.0908	1176.84	39.0908
TBP79122-43	43.9859	32259	2.95789	11.776	1.88811	2.61582	2.24701	0.223412	1.21824	0.54216	1299.88	14.3412	1305.09	16.5072	1313.65	36.6252	1313.65	36.6252
TBP79122-34	88.7638	101566	1.79696	11.7509	1.23136	2.71886	1.98583	0.231715	1.55797	0.784544	1343.48	18.894	1333.62	14.7428	1317.8	23.8704	1317.8	23.8704
TBP79122-15	59.9018	54476.5	1.24246	11.2657	1.66668	2.9839	2.42362	0.243805	1.75958	0.726013	1406.45	22.2341	1403.52	18.434	1399.07	31.947	1399.07	31.947
TBP79122-10	189.256	103441	1.60213	11.2456	0.521393	2.95279	1.1896	0.240832	1.06925	0.898832	1391.02	13.3782	1395.57	9.0234	1402.49	9.98884	1402.49	9.98884
TBP79122-20	141.431	113589	0.863402	11.2079	0.558146	2.83294	1.80381	0.230283	1.71529	0.950923	1335.98	20.6972	1364.3	13.5379	1408.93	10.6836	1408.93	10.6836
TBP79122-16	44.9271	48203.9	1.03263	11.178	1.3101	3.04757	2.11303	0.247069	1.65787	0.784595	1423.34	21.1738	1419.63	16.1559	1414.03	25.0603	1414.03	25.0603
TBP79122-18	139.488	97267.6	1.86155	11.1414	0.648812	2.95545	1.7369	0.238816	1.61117	0.927612	1380.54	20.0225	1396.25	13.1783	1420.31	12.3999	1420.31	12.3999
TBP79122-8	168.552	171529	0.434354	11.1304	0.444561	2.88837	1.72177	0.233165	1.66339	0.966091	1351.06	20.2747	1378.88	12.9871	1422.19	8.49412	1422.19	8.49412
TBP79122-27	85.9914	60323.8	0.508919	11.0821	1.34265	3.12698	1.93652	0.251331	1.39549	0.720617	1445.34	18.0684	1439.35	14.8997	1430.5	25.6259	1430.5	25.6259
TBP79122-100	78.0088	111549	1.61357	11.0577	1.10147	3.16662	2.82798	0.253957	2.60466	0.92103	1458.85	34.0056	1449.06	21.8266	1434.71	21.0105	1434.71	21.0105
TBP79122-70	42.4644	117875	0.967902	11.0311	1.86712	3.16827	1.97964	0.253477	0.657912	0.332339	1456.38	8.57648	1449.46	15.2797	1439.3	35.5949	1439.3	35.5949
TBP79122-45	291.671	519883	1.4711	11.0007	0.219269	3.09137	0.896575	0.246643	0.869349	0.969633	1421.14	11.0877	1430.55	6.87868	1444.56	4.17684	1444.56	4.17684
TBP79122-21	112.071	77947.8	1.06355	10.9997	0.829046	3.14309	2.29829	0.250747	2.14356	0.932673	1442.33	27.7027	1443.31	17.7056	1444.73	15.7923	1444.73	15.7923
TBP79122-31	97.2652	76468.1	0.521822	10.9837	0.959643	3.13644	1.54025	0.249854	1.20476	0.782186	1437.72	15.5255	1441.68	11.8591	1447.5	18.2733	1447.5	18.2733
TBP79122-59	52.6327	113439	1.20214	10.8816	1.21932	3.20386	1.50529	0.25285	0.882684	0.58639	1453.16	11.4839	1458.09	11.6491	1465.27	23.1629	1465.27	23.1629
TBP79122-51	120.128	93609.5	1.88871	10.7686	0.786193	3.40883	4.75003	0.266233	4.68452	0.986208	1521.65	63.4958	1506.43	37.3081	1485.08	14.895	1485.08	14.895
TBP79122-23	23.3188	30853.2	0.448983	9.80316	3.69772	4.07977	3.96776	0.290068	1.43875	0.36261	1641.87	20.8542	1650.27	32.3678	1660.96	68.4808	1660.96	68.4808
TBP79122-77	74.5193	102516	1.30744	9.75067	0.95668	4.16787	1.17358	0.294746	0.679752	0.57921	1665.2	9.97544	1667.73	9.61081	1670.89	17.6889	1670.89	17.6889
TBP79122-49	106.369	147371	0.669883	9.74765	0.628053	4.20511	0.928564	0.297287	0.683945	0.736562	1677.84	10.1037	1675.02	7.61724	1671.46	11.6111	1671.46	11.6111
TBP79122-87	671.584	459508	5.02167	9.72655	0.129577	4.23986	0.67247	0.299095	0.659868	0.98126	1686.82	9.79363	1681.77	5.52509	1675.47	2.39466	1675.47	2.39466
TBP79122-5	167.599	360110	2.00021	9.70268	0.5822	4.13208	4.2197	0.290776	4.17934	0.990436	1645.41	60.6941	1660.67	34.5107	1680.01	10.7532	1680.01	10.7532
TBP79122-90	141.575	137854	1.49506	9.68672	0.724184	4.38765	2.9476	0.308253	2.85726	0.96935	1732.1	43.4	1710.02	24.3789	1683.05	13.3706	1683.05	13.3706
TBP79122-19	313.711	324334	0.849442	9.67555	0.235071	4.00358	1.07012	0.280946	1.04398	0.975575	1596.12	14.7606	1634.92	8.69441	1685.18	4.33888	1685.18	4.33888
TBP79122-22	31.3965	33148.1	0.838237	9.67337	1.7335	4.22491	1.98851	0.296411	0.974246	0.489937	1673.49	14.3595	1678.87	16.328	1685.59	31.9938	1685.59	31.9938
TBP79122-37	49.039	41217.4	0.939534	9.66275	1.10727	4.23358	2.16085	0.296693	1.85559	0.858732	1674.89	27.3698	1680.56	17.7503	1687.62	20.4302	1687.62	20.4302
TBP79122-58	88.7014	126826	2.49285	9.65816	1.13099	4.36887	3.12286	0.306029	2.91086	0.932114	1721.13	43.97	1706.47	25.8085	1688.5	20.8656	1688.5	20.8656
TBP79122-32	113.746	162624	2.56622	9.64698	1.04811	4.27234	1.37814	0.298921	0.894837	0.649307	1685.95	13.275	1688.05	11.3398	1690.63	19.3312	1690.63	19.3312
TBP79122-84	91.9798	172474	1.49249	9.63615	0.556784	4.45313	1.29669	0.31122	1.17106	0.903119	1746.71	17.9181	1722.28	10.7523	1692.71	10.2672	1692.71	10.2672
TBP79122-67	46.5001	108923	0.925964	9.59509	1.34046	4.30906	4.0883	0.299868	3.8623	0.944721	1690.66	57.4391	1695.1	33.7052	1700.58	24.693	1700.58	24.693
TBP79122-56	758.848	1.12905e+06	1.98664	9.58105	0.071578	4.33533	1.54218	0.301255	1.54052	0.998922	1697.53	22.991	1700.11	12.7247	1703.27	1.31641	1703.27	1.31641
TBP79122-42	119.119	126443	1.00983	9.57263	0.714283	4.22949	1.03382	0.293642	0.747387	0.722936	1659.7	10.9363	1679.76	8.49013	1704.89	13.1496	1704.89	13.1496
TBP79122-68	136.334	116420	3.62488	9.5631	0.292018	4.31635	0.979863	0.299374	0.935338	0.95456	1688.21	13.8921	1696.49	8.07807	1706.72	5.37361	1706.72	5.37361
TBP79122-65	94.2783	108540	0.893882	9.5533	0.687802	4.44185	2.90913	0.307763	2.82665	0.971649	1729.69	42.8829	1720.18	24.1153	1708.61	12.6561	1708.61	12.6561
TBP79122-13	59.6577	49838.4	1.24591	9.55101	0.912699	4.44792	1.59939	0.308109	1.3134	0.821189	1731.4	19.9424	1721.31	13.2597	1709.05	16.7942	1709.05	16.7942
TBP79122-83	42.4463	36002.8	1.05317	9.50758	1.15513	4.4454	1.82671	0.306535	1.41511	0.774678	1723.63	21.4027	1720.84	15.143	1717.43	21.2333	1717.43	21.2333
TBP79122-75	159.316	216656	2.36137	9.50536	0.482962	4.50265	0.793161	0.31041	0.629168	0.793241	1742.72	9.60757	1731.46	6.59013	1717.86	8.87772	1717.86	8.87772
TBP79122-55	134.715	67582.6	1.75005	9.46093	0.748504	4.48272	1.80266	0.307591	1.63991	0.90972	1728.84	24.8682	1727.78	14.9665	1726.47	13.7441	1726.47	13.7441
TBP79122-25	345.991	58693.7	1.9795	9.42033	0.370035	4.12655	5.05239	0.281937	5.03882	0.997314	1601.11	71.4414	1659.58	41.3169	1734.36	6.78779	1734.36	6.78779
TBP79122-29	231.254	73413.1	1.0508	9.40593	0.199365	4.53237	0.845344	0.30919	0.821499	0.971792	1736.72	12.5069	1736.93	7.03209	1737.17	3.65579	1737.17	3.65579
TBP79122-74	320.559	82643.5	3.66103	9.34799	0.27017	4.60296	11.6458	0.312071	11.6426	0.999731	1750.89	178.557	1749.8	97.4424	1748.49	4.94722	1748.49	4.94722
TBP79122-39	212.491	15735.8	1.07186	9.08369	0.381957	4.5721	3.18445	0.301215	3.16146	0.992781	1697.33	47.1781	1744.2	26.5375	1800.83	6.94903	1800.83	6.94903
TBP79122-89	152.36	208619	2.21574	8.89727	0.45818	5.2414	1.54777	0.338223	1.4784	0.95518	1878.11	24.0872	1859.37	13.1985	1838.47	8.29756	1838.47	8.29756
TBP79122-7	81.8993	101858	0.700776	8.88978	0.716944	5.11019	1.11414	0.329478	0.852817	0.765449	1835.85	13.6245	1837.8	9.46159	1839.99	12.9814	1839.99	12.9814
TBP79122-38	152.078	193830	1.73307	8.84882	0.283779	5.19651	0.859482	0.3335	0.811282	0.94392	1855.32	13.0796	1852.04	7.31878	1848.35	5.13299	1848.35	5.13299
TBP79122-85	652.761	227983	3.34692	8.73985	0.241297	4.93288	2.76086	0.312682	2.75029	0.996173	1753.89	42.2325	1807.9	23.3123	1870.73	4.35282	1870.73	4.35282
TBP79122-4	221.999	6218.71	1.87292	5.77659	0.679519	10.3473	2.13502	0.433508	2.024	0.947999	2321.51	39.4576	2466.34	19.7707	2587.95	11.3384	2587.95	11.3384
TBP79122-30	22.4766	44377.7	0.664607	5.62134	0.922452	11.6851	3.30752	0.4764	3.17628	0.960321	2511.56	66.0724	2579.51	30.9461	2633.32	15.3261	2633.32	15.3261
Lodore Canyon, Tbp-LOD-52913. U-Pb geochronologic analyses.
							Isotope ratios						Apparent ages (Ma)
Analysis	U	206Pb	U/Th	206Pb*	±	207Pb*	±	206Pb*	±	error	206Pb*	±	207Pb*	±	206Pb*	±	Best age	±
	(ppm)	204Pb		207Pb*	(%)	235U*	(%)	238U	(%)	corr.	238U*	(Ma)	235U	(Ma)	207Pb*	(Ma)	(Ma)	(Ma)
Tbp LOD 52913-80	528.348	1486.46	1.04071	32.7076	56.5422	0.0116456	56.9808	0.00276254	7.05648	0.12384	17.7839	1.25319	11.7564	6.66035	-1101.04	1839.92	17.7839	1.25319
Tbp LOD 52913-74	363.507	859.327	0.870128	18.1413	108.753	0.0215379	109.081	0.00283381	8.44926	0.0774585	18.2421	1.53914	21.637	23.3563	417.189	784.895	18.2421	1.53914
Tbp LOD 52913-32	225.354	1205.3	0.608825	84.4045	139.633	0.00533056	141.362	0.00326315	22.047	0.155961	21.0014	4.62264	5.39819	7.6109	NA	NA	21.0014	4.62264
Tbp LOD 52913-30	141.445	605.151	0.660845	11.581	147.481	0.0402944	148.907	0.00338446	20.5575	0.138056	21.7808	4.47002	40.1114	58.6292	1345.98	358.653	21.7808	4.47002
Tbp LOD 52913-17	221.133	1524.64	1.57232	-13.4635	429.847	-0.0358493	430.12	0.00350057	15.3315	0.0356446	22.5267	3.44765	-37.0693	-163.795	NA	NA	22.5267	3.44765
Tbp LOD 52913-84	300.673	909.144	1.52126	22.8718	40.3025	0.0228043	42.9728	0.00378281	14.9121	0.347012	24.3396	3.62269	22.895	9.72884	-126.296	1032.07	24.3396	3.62269
Tbp LOD 52913-6	731.337	2670.57	0.531343	19.408	12.3213	0.0268766	13.2778	0.00378315	4.94825	0.372671	24.3417	1.20222	26.9297	3.52869	264.369	283.737	24.3417	1.20222
Tbp LOD 52913-61	211.48	1243.82	1.37738	9.42132	90.7634	0.0580795	92.5383	0.00396856	18.0375	0.194919	25.5324	4.59628	57.3239	51.6214	1734.17	219.021	25.5324	4.59628
Tbp LOD 52913-39	118.647	798.859	0.966861	4.64916	397.101	0.132864	397.307	0.00448004	12.799	0.0322144	28.8157	3.6799	126.668	512.676	2944.3	76.0316	28.8157	3.6799
Tbp LOD 52913-53	327.254	2291.21	1.05407	21.8442	92.1849	0.028683	92.6878	0.00454423	9.64249	0.104032	29.2276	2.81189	28.7144	26.2478	-14.0029	966.697	29.2276	2.81189
Tbp LOD 52913-71	168.695	1021.93	1.11808	3.54417	814.937	0.18875	815.02	0.00485176	11.63	0.0142696	31.2008	3.61989	175.562	#NUM!	3374.88	537.487	31.2008	3.61989
Tbp LOD 52913-36	87.6125	576.797	1.31615	10.9622	203.954	0.0633115	205.294	0.00503363	23.4195	0.114078	32.3674	7.56129	62.3325	124.74	1451.23	578.831	32.3674	7.56129
Tbp LOD 52913-51	147.748	1088.96	1.40182	23.8947	94.5975	0.0293308	95.3708	0.00508305	12.1203	0.127086	32.6844	3.95143	29.3536	27.6008	-235.514	1164.44	32.6844	3.95143
Tbp LOD 52913-19	194.467	667.147	1.60567	11.5712	39.1665	0.0647576	40.4728	0.00543462	10.1999	0.252018	34.9389	3.55409	63.7124	24.9989	1347.6	787.475	34.9389	3.55409
Tbp LOD 52913-48	333.472	1648.94	0.98042	21.6547	38.9282	0.0348983	39.2385	0.00548094	4.9248	0.125509	35.2359	1.73057	34.8308	13.4361	6.99938	969.675	35.2359	1.73057
Tbp LOD 52913-22	1484.24	32432.3	1.64363	21.0992	7.43756	0.0361328	7.49873	0.00552925	0.955853	0.127469	35.5457	0.338829	36.0414	2.65525	69.1901	177.136	35.5457	0.338829
Tbp LOD 52913-28	111.044	934.44	0.874904	-4.56138	414.739	-0.167918	415.206	0.00555512	19.688	0.0474173	35.7115	7.01143	-186.653	-1232.79	NA	NA	35.7115	7.01143
Tbp LOD 52913-11	225.923	1650.93	0.839329	18.0668	48.3406	0.0449457	49.7792	0.00588936	11.8809	0.238673	37.8539	4.48422	44.6412	21.744	426.373	1142.64	37.8539	4.48422
Tbp LOD 52913-81	58.5081	893.216	0.903945	27.9149	89.9145	0.0616665	90.6018	0.0124848	11.1393	0.122947	79.9842	8.85461	60.7603	53.4847	-644.389	3315.37	79.9842	8.85461
Tbp LOD 52913-49	441.489	5150.15	1.82149	22.0815	12.3433	0.0834301	12.69	0.0133613	2.94618	0.232165	85.5623	2.50416	81.3647	9.92266	-40.1767	300.753	85.5623	2.50416
Tbp LOD 52913-86	84.7038	740.246	1.07884	2.82224	984.88	0.715308	984.922	0.0146415	9.14186	0.00928181	93.701	8.50407	547.893	#NUM!	3725.71	452.592	93.701	8.50407
Tbp LOD 52913-79	516.783	4728.84	1.98879	22.5633	8.78882	0.089478	9.32848	0.0146426	3.12684	0.335193	93.7077	2.9089	87.017	7.77942	-92.8691	215.999	93.7077	2.9089
Tbp LOD 52913-63	447.223	11233.3	2.67566	20.5125	4.61471	0.107052	5.16751	0.0159262	2.32543	0.45001	101.858	2.35002	103.265	5.0739	135.864	108.484	101.858	2.35002
Tbp LOD 52913-54	603.867	26418.3	1.14246	21.6942	5.91021	0.110281	6.13324	0.0173518	1.63894	0.267223	110.897	1.802	106.223	6.18577	2.61313	142.482	110.897	1.802
Tbp LOD 52913-16	43.5426	3601.65	0.874651	1.60771	1436.62	2.0833	1436.65	0.0242917	8.51467	0.00592676	154.723	13.0173	1143.32	#NUM!	NA	NA	154.723	13.0173
Tbp LOD 52913-45	84.5965	3456.38	0.573222	21.0585	29.9683	0.16567	30.2652	0.0253028	4.22875	0.139723	161.083	6.72741	155.654	43.7027	73.7855	726.62	161.083	6.72741
Tbp LOD 52913-72	142.141	2278.12	0.852878	22.0603	14.8687	0.16286	15.3378	0.0260569	3.76427	0.245425	165.823	6.16242	153.203	21.8145	-37.8427	362.679	165.823	6.16242
Tbp LOD 52913-41	98.0753	1528.49	0.900416	28.6459	61.3928	0.130308	61.8355	0.0270728	7.3863	0.119451	172.202	12.551	124.375	72.5071	-715.867	1870.02	172.202	12.551
Tbp LOD 52913-34	354.45	13859.7	7.61344	19.9734	7.07783	0.189195	7.50434	0.027407	2.49389	0.332327	174.299	4.2886	175.943	12.1233	198.082	164.601	174.299	4.2886
Tbp LOD 52913-21	202.699	7582.73	1.2189	21.1011	13.7744	0.179867	13.8468	0.0275268	1.41443	0.102148	175.05	2.44265	167.946	21.437	68.9723	329.033	175.05	2.44265
Tbp LOD 52913-56	249.541	23721.1	0.652778	21.6853	15.5742	0.176222	15.6763	0.0277155	1.78621	0.113944	176.235	3.10529	164.804	23.852	3.59593	377.058	176.235	3.10529
Tbp LOD 52913-62	233.223	7889.92	1.27667	21.471	8.43956	0.178563	8.77042	0.0278063	2.38623	0.272077	176.804	4.16161	166.824	13.4932	27.4852	202.678	176.804	4.16161
Tbp LOD 52913-4	169.841	11652.5	1.24408	24.24	19.0206	0.163322	20.81	0.0287128	8.44252	0.405695	182.487	15.1905	153.607	29.6736	-271.849	487.014	182.487	15.1905
Tbp LOD 52913-82	523.969	11114.3	1.14044	20.3669	5.47897	0.197045	6.47845	0.0291064	3.45705	0.533623	184.953	6.30308	182.622	10.8286	152.578	128.435	184.953	6.30308
Tbp LOD 52913-70	73.2852	997.907	0.792933	38.5861	41.0585	0.104138	41.5392	0.0291433	6.30156	0.151702	185.185	11.5035	100.589	39.8013	-1633.52	1457.3	185.185	11.5035
Tbp LOD 52913-75	430.845	17389.1	2.55183	20.4164	3.76254	0.238071	4.05615	0.035252	1.51515	0.373545	223.335	3.32593	216.84	7.9198	146.912	88.2474	223.335	3.32593
Tbp LOD 52913-38	458.254	9981.34	2.34223	19.1622	3.48541	0.26616	4.25917	0.0369902	2.44796	0.574749	234.15	5.62904	239.619	9.09119	293.577	79.5853	234.15	5.62904
Tbp LOD 52913-93	187.77	6164.18	1.88184	20.7114	16.2341	0.250586	17.354	0.0376414	6.13302	0.353407	238.197	14.3421	227.052	35.3222	113.144	385.232	238.197	14.3421
Tbp LOD 52913-83	75.9608	12146.7	2.25896	13.4862	3.88254	1.77395	4.53812	0.173512	2.34956	0.517738	1031.43	22.3948	1035.97	29.4761	1045.57	78.3326	1045.57	78.3326
Tbp LOD 52913-57	112.27	20151.2	2.37979	13.2902	2.21567	1.89959	2.65056	0.183101	1.45474	0.548841	1083.9	14.5135	1080.95	17.6333	1075.02	44.5148	1075.02	44.5148
Tbp LOD 52913-40	204.018	82177.8	1.77854	13.0939	0.881769	1.88021	1.44397	0.178556	1.14348	0.791897	1059.08	11.1679	1074.14	9.57159	1104.8	17.6432	1104.8	17.6432
Tbp LOD 52913-65	26.2594	7810.22	0.87403	12.6847	4.4788	2.25887	5.08414	0.207812	2.406	0.473236	1217.15	26.6863	1199.55	35.7974	1167.97	88.7522	1167.97	88.7522
Tbp LOD 52913-25	247.11	73175	8.89568	12.5427	0.833709	2.19429	0.932254	0.199612	0.417165	0.44748	1173.23	4.47478	1179.23	6.50264	1190.26	16.4597	1190.26	16.4597
Tbp LOD 52913-23	111.565	32385.1	2.2709	12.4011	1.5745	2.26574	2.12207	0.203783	1.42272	0.670439	1195.61	15.5259	1201.69	14.9503	1212.63	30.979	1212.63	30.979
Tbp LOD 52913-64	38.3979	10830.8	0.836105	12.3349	4.44638	2.29306	4.87841	0.20514	2.00714	0.411434	1202.87	22.0248	1210.15	34.5057	1223.14	87.3858	1223.14	87.3858
Tbp LOD 52913-24	188.559	53992.1	1.71647	12.0455	1.05218	2.44222	1.13849	0.213358	0.434825	0.381933	1246.69	4.92894	1255.13	8.20187	1269.65	20.5373	1269.65	20.5373
Tbp LOD 52913-33	140.942	34427.5	0.853094	11.3032	1.59186	2.89581	1.6683	0.237394	0.499197	0.299225	1373.13	6.1738	1380.82	12.5921	1392.7	30.5407	1392.7	30.5407
Tbp LOD 52913-20	265.972	174608	1.63163	11.2296	0.50301	3.01493	1.19326	0.24555	1.08206	0.906809	1415.49	13.7515	1411.4	9.09865	1405.23	9.63308	1405.23	9.63308
Tbp LOD 52913-35	352.571	87431.6	1.7445	11.2201	0.50809	2.97882	1.12054	0.242403	0.998731	0.891291	1399.18	12.5615	1402.23	8.51842	1406.85	9.72822	1406.85	9.72822
Tbp LOD 52913-29	163.992	49359.3	1.02485	11.2189	1.28481	3.01926	1.93431	0.245668	1.44596	0.747535	1416.1	18.3833	1412.5	14.755	1407.05	24.5999	1407.05	24.5999
Tbp LOD 52913-37	803.165	307318	3.03325	11.1209	0.317234	3.01111	1.29515	0.242865	1.2557	0.969538	1401.57	15.8178	1410.44	9.87248	1423.83	6.05995	1423.83	6.05995
Tbp LOD 52913-9	78.7925	16462.1	0.742221	11.056	1.88427	3.13463	2.85382	0.251353	2.14332	0.751035	1445.45	27.7532	1441.23	21.9722	1435	35.9428	1435	35.9428
Tbp LOD 52913-26	30.9134	12500.6	1.08001	11.0549	4.96363	3.10866	5.40234	0.249245	2.13253	0.394741	1434.58	27.4281	1434.83	41.5267	1435.19	94.7295	1435.19	94.7295
Tbp LOD 52913-59	45.4334	1291	0.798729	10.9795	4.10898	3.02005	4.49533	0.24049	1.82324	0.405585	1389.24	22.786	1412.7	34.3035	1448.23	78.2638	1448.23	78.2638
Tbp LOD 52913-12	48.7685	18639.7	1.97864	10.9353	3.70343	3.24889	4.25957	0.25767	2.1044	0.494041	1477.91	27.7938	1468.91	33.0833	1455.91	70.4607	1455.91	70.4607
Tbp LOD 52913-46	130.755	15593.1	1.05002	10.8852	1.74684	3.16862	4.05738	0.250152	3.66209	0.902574	1439.26	47.2385	1449.55	31.325	1464.64	33.1881	1464.64	33.1881
Tbp LOD 52913-10	203.606	55156.4	3.0945	10.827	0.669757	3.24644	3.29913	0.254927	3.23043	0.979177	1463.83	42.304	1468.33	25.6156	1474.81	12.7065	1474.81	12.7065
Tbp LOD 52913-50	54.8325	18039.4	1.14818	10.815	2.47159	3.3694	3.64099	0.264287	2.67358	0.734301	1511.74	36.0285	1497.31	28.5164	1476.93	46.8821	1476.93	46.8821
Tbp LOD 52913-47	127.083	35479.7	1.45409	10.7739	1.74823	3.41888	2.32449	0.267151	1.53198	0.65906	1526.32	20.8209	1508.74	18.2632	1484.13	33.1276	1484.13	33.1276
Tbp LOD 52913-60	79.3062	108144	0.897618	9.77516	1.83283	4.12988	2.21308	0.292793	1.24034	0.560461	1655.47	18.1089	1660.23	18.0927	1666.25	33.9125	1666.25	33.9125
Tbp LOD 52913-58	191.741	90453.4	1.7481	9.68978	0.655658	4.1991	1.31387	0.2951	1.13858	0.866585	1666.96	16.7243	1673.85	10.7752	1682.47	12.1062	1682.47	12.1062
Tbp LOD 52913-89	62.8941	34939.4	1.6596	9.64412	1.70001	4.35912	2.96052	0.304902	2.42377	0.818698	1715.57	36.5088	1704.63	24.4561	1691.18	31.3532	1691.18	31.3532
Tbp LOD 52913-91	218.214	58563.5	1.6387	9.63771	0.621371	4.25033	1.37374	0.297095	1.22517	0.891855	1676.89	18.0901	1683.8	11.2924	1692.41	11.4569	1692.41	11.4569
Tbp LOD 52913-42	35.921	12801.6	0.768887	9.63735	3.16051	4.43421	4.085	0.309936	2.58813	0.633569	1740.39	39.4759	1718.75	33.8582	1692.48	58.2915	1692.48	58.2915
Tbp LOD 52913-88	514.173	317962	2.0574	9.60323	0.275301	4.43713	1.63831	0.309043	1.61501	0.98578	1735.99	24.5788	1719.3	13.5764	1699.01	5.07078	1699.01	5.07078
Tbp LOD 52913-87	22.1512	5344.28	1.58889	9.56927	4.7452	4.40797	5.36928	0.305925	2.51243	0.467927	1720.62	37.9415	1713.84	44.466	1705.54	87.4018	1705.54	87.4018
Tbp LOD 52913-7	61.0353	19574.1	1.6104	9.56009	2.02455	4.50419	2.96125	0.312304	2.16106	0.729781	1752.03	33.1537	1731.75	24.6101	1707.3	37.2645	1707.3	37.2645
Tbp LOD 52913-85	97.1051	25865.5	1.4828	9.51363	1.51145	4.47827	2.80716	0.308998	2.36551	0.842672	1735.77	35.9969	1726.95	23.3045	1716.26	27.7867	1716.26	27.7867
Tbp LOD 52913-73	82.4707	17485.2	0.494702	9.49848	1.65764	4.48559	2.24819	0.30901	1.51875	0.675543	1735.83	23.1119	1728.31	18.6684	1719.19	30.4636	1719.19	30.4636
Tbp LOD 52913-14	81.5641	54445.8	1.29025	9.49792	1.46888	4.39588	2.09211	0.302812	1.48974	0.712074	1705.24	22.3213	1711.57	17.3077	1719.3	26.9936	1719.3	26.9936
Tbp LOD 52913-3	359.092	197236	1.7021	9.4426	0.379281	4.5484	2.35239	0.311493	2.32161	0.986916	1748.05	35.5463	1739.87	19.5832	1730.03	6.9612	1730.03	6.9612
Tbp LOD 52913-31	15.2019	8486.72	1.3108	9.40788	6.63054	4.27169	7.58419	0.291468	3.68184	0.485463	1648.86	53.5674	1687.92	62.4794	1736.79	121.716	1736.79	121.716
Tbp LOD 52913-44	169.402	77619.3	1.2029	9.34557	0.480267	4.56106	0.992679	0.309151	0.868767	0.875174	1736.53	13.2252	1742.18	8.26717	1748.96	8.79213	1748.96	8.79213
Tbp LOD 52913-5	31.2598	5899.28	0.676999	9.20393	7.55454	4.28364	9.54603	0.285947	5.83572	0.611325	1621.24	83.6565	1690.22	78.7412	1776.88	138.037	1776.88	138.037
Tbp LOD 52913-69	89.1506	19535.4	0.758621	9.09534	0.806878	4.95706	2.31343	0.326996	2.16816	0.937205	1823.8	34.4418	1812.03	19.5493	1798.5	14.6841	1798.5	14.6841
Tbp LOD 52913-95	147.849	55633.6	1.89914	9.05864	0.85927	4.93201	2.64086	0.324031	2.49715	0.945585	1809.38	39.3964	1807.75	22.298	1805.85	15.6216	1805.85	15.6216
Tbp LOD 52913-55	96.4213	4988.94	0.870372	8.89436	5.18614	4.97505	6.36726	0.320931	3.69404	0.580161	1794.27	57.8578	1815.09	53.8823	1839.06	93.969	1839.06	93.969
Tbp LOD 52913-18	80.2928	62961.8	0.669231	8.84237	0.911737	5.24852	1.7486	0.336592	1.49209	0.853306	1870.25	24.2226	1860.53	14.9146	1849.67	16.4874	1849.67	16.4874
Tbp LOD 52913-1	130.342	105810	1.52821	8.80405	0.864949	5.37057	1.9101	0.342927	1.70303	0.891597	1900.74	28.0346	1880.17	16.3518	1857.51	15.6263	1857.51	15.6263
Tbp LOD 52913-94	108.471	8914.05	0.729595	8.20787	0.763348	6.0812	1.25487	0.362008	0.99599	0.7937	1991.69	17.0653	1987.55	10.9428	1983.25	13.5882	1983.25	13.5882
Tbp LOD 52913-13	53.8324	15357.1	0.642326	6.39092	0.617499	9.54067	2.46638	0.442222	2.38783	0.968151	2360.58	47.1995	2391.47	22.6711	2417.88	10.4795	2417.88	10.4795
Tbp LOD 52913-68	105.733	33148.9	0.579869	5.58337	0.348559	11.5068	0.802299	0.46596	0.722627	0.900696	2465.82	14.8067	2565.13	7.49518	2644.57	5.78293	2644.57	5.78293
Tbp LOD 52913-67	77.1315	54381.4	0.827801	5.50664	0.731022	12.2066	1.02166	0.487508	0.713725	0.698591	2559.89	15.079	2620.42	9.58859	2667.51	12.1086	2667.51	12.1086
Jesse Ewing Canyon, Tbp 12-3. U-Pb geochronologic analyses.
							Isotope ratios						Apparent ages (Ma)
Analysis	U	206Pb	U/Th	206Pb*	±	207Pb*	±	206Pb*	±	error	206Pb*	±	207Pb*	±	206Pb*	±	Best age	±
	(ppm)	204Pb		207Pb*	(%)	235U*	(%)	238U	(%)	corr.	238U*	(Ma)	235U	(Ma)	207Pb*	(Ma)	(Ma)	(Ma)
TBP-12-3-76	123.297	574.615	0.93936	4.90369	262.466	0.0364524	263.595	0.00129643	24.3802	0.0924912	8.3519	2.03489	36.3545	94.4047	2857.88	231.359	8.3519	2.03489
TBP-12-3-60	161.35	1727.08	0.527748	5.89822	93.3917	0.0328925	115.648	0.00140707	68.2093	0.589799	9.06421	6.17828	32.861	37.4117	2553.12	#VALUE!	9.06421	6.17828
TBP-12-3-105	388.178	2314.68	0.392943	16.421	72.6503	0.0132585	75.4224	0.00157903	20.2599	0.268619	10.1711	2.05902	13.374	10.0211	635.645	1843.57	10.1711	2.05902
TBP-12-3-10	130.661	1282.02	1.12905	4.14519	413.105	0.0755548	413.538	0.00227146	18.9114	0.0457307	14.6262	2.76287	73.9571	303.712	3128.18	25.021	14.6262	2.76287
TBP-12-3-42	198.483	3123.25	0.900854	22.884	105.512	0.0205274	105.892	0.00340693	8.9648	0.0846597	21.9252	1.96221	20.6321	21.6306	-127.62	1187.65	21.9252	1.96221
TBP-12-3-74	231.948	4129.58	1.67076	14.1126	113.472	0.0387766	113.771	0.00396895	8.24214	0.0724448	25.5349	2.10046	38.6289	43.1491	953.326	429.224	25.5349	2.10046
TBP-12-3-104	83.864	1325.53	0.777358	-6.32102	263.693	-0.0907955	264.956	0.00416246	25.8473	0.0975532	26.7772	6.90685	-96.6494	-275.209	NA	NA	26.7772	6.90685
TBP-12-3-56	300.379	11529.3	1.14573	25.7417	63.6456	0.0237615	63.8711	0.00443617	5.3621	0.083952	28.5342	1.52665	23.8448	15.0536	-427.011	1846.25	28.5342	1.52665
TBP-12-3-67	227.172	3168.08	1.37747	24.5166	31.905	0.0268495	32.6165	0.00477415	6.77551	0.207733	30.7029	2.07533	26.903	8.65979	-300.771	833.358	30.7029	2.07533
TBP-12-3-64	412.891	13516.7	1.17033	26.9809	24.0408	0.0245446	24.4168	0.00480298	4.26871	0.174827	30.8879	1.31536	24.6212	5.93949	-551.914	654.577	30.8879	1.31536
TBP-12-3-24	223.162	4183.58	1.25797	18.7931	16.1436	0.0353279	17.0371	0.0048152	5.44469	0.319579	30.9663	1.68198	35.2523	5.90296	337.787	367.795	30.9663	1.68198
TBP-12-3-73	94.3563	1649.62	1.02191	10.946	161.344	0.0646208	162.093	0.00513013	15.5684	0.0960458	32.9864	5.12233	63.5819	100.226	1454.04	356.034	32.9864	5.12233
TBP-12-3-92	227.743	3834.86	0.775243	19.9852	24.3891	0.0359432	26.1921	0.00520984	9.54986	0.364608	33.4976	3.19068	35.8555	9.22769	196.731	574.196	33.4976	3.19068
TBP-12-3-81	196.877	2565.63	1.04396	19.8984	16.4289	0.0366479	17.6091	0.00528891	6.33812	0.359935	34.0047	2.14958	36.546	6.32106	206.807	383.266	34.0047	2.14958
TBP-12-3-65	130.456	3881.87	0.285471	7.24196	396.033	0.101675	396.204	0.00534035	11.6337	0.0293629	34.3345	3.98376	98.3214	389.304	2203.3	697.484	34.3345	3.98376
TBP-12-3-68	240.222	1453.69	0.596758	15.1527	38.2667	0.0489751	39.0366	0.00538225	7.71467	0.197627	34.6032	2.66237	48.5491	18.508	806.194	830.66	34.6032	2.66237
TBP-12-3-79	326.619	5749.61	0.945694	27.4992	44.8594	0.0272978	45.1044	0.00544436	4.69478	0.104087	35.0014	1.63879	27.3462	12.1703	-603.403	1274.51	35.0014	1.63879
TBP-12-3-37	926.327	26519.1	1.45814	22.5904	6.98092	0.033474	7.22467	0.00548441	1.86082	0.257565	35.2582	0.6543	33.4324	2.37606	-95.8171	171.541	35.2582	0.6543
TBP-12-3-86	299.114	9879.59	0.909291	21.1732	21.8716	0.0359155	22.5825	0.00551526	5.62141	0.248928	35.456	1.98765	35.8283	7.95001	60.847	526.556	35.456	1.98765
TBP-12-3-32	112.163	3025.41	1.46741	26.93	78.5564	0.0290024	80.1009	0.00566459	15.6538	0.195426	36.4133	5.684	29.0295	22.9276	-546.837	2528.09	36.4133	5.684
TBP-12-3-7	102.817	3844.5	1.32436	9.36684	173.11	0.087146	173.346	0.00592024	9.03393	0.0521151	38.0518	3.42745	84.8413	142.011	1744.8	205.35	38.0518	3.42745
TBP-12-3-3	148.665	5907.39	0.700273	22.1024	80.4966	0.0382718	80.9867	0.00613505	8.89659	0.109852	39.4282	3.49706	38.1354	30.3208	-42.4802	2407.62	39.4282	3.49706
TBP-12-3-87	289.983	7584.97	1.79017	21.6234	11.6876	0.0392305	12.1638	0.00615242	3.3701	0.277061	39.5395	1.32844	39.0724	4.66243	10.4852	281.971	39.5395	1.32844
TBP-12-3-5	169.289	4293.19	1.1403	24.9413	45.249	0.0348446	45.791	0.00630308	7.02491	0.153412	40.5047	2.8365	34.7781	15.6569	-344.865	1221.37	40.5047	2.8365
TBP-12-3-40	230.875	5011.87	1.02847	18.4778	29.7663	0.05437	30.0117	0.00728632	3.83008	0.12762	46.8003	1.786	53.7579	15.7153	375.985	683.457	46.8003	1.786
TBP-12-3-88	1080.53	31546.1	2.49282	21.0491	4.99975	0.0499012	5.15406	0.00761805	1.25173	0.242863	48.923	0.610066	49.4452	2.48738	74.8449	118.889	48.923	0.610066
TBP-12-3-38	190.344	6055.73	2.161	20.6985	25.275	0.0523552	25.606	0.00785956	4.10388	0.16027	50.4679	2.06305	51.8157	12.9358	114.582	604.624	50.4679	2.06305
TBP-12-3-90	1157.67	3112.67	3.88873	16.4749	4.03898	0.130265	6.6774	0.015565	5.31737	0.796322	99.5656	5.2536	124.336	7.81437	628.543	87.0621	99.5656	5.2536
TBP-12-3-97	60.4149	1025.02	0.190258	16.5208	20.4048	0.211685	20.7621	0.0253641	3.83556	0.184738	161.468	6.11629	194.966	36.8462	622.546	444.361	161.468	6.11629
TBP-12-3-54	119.274	14687.4	0.940949	20.3379	10.7599	0.191149	11.079	0.0281953	2.64004	0.238292	179.244	4.66692	177.61	18.0544	155.915	252.505	179.244	4.66692
TBP-12-3-18	598.927	86882.9	1.60607	19.5038	2.57979	0.255161	2.79429	0.0360938	1.07365	0.384229	228.575	2.41109	230.76	5.76795	253.081	59.3344	228.575	2.41109
TBP-12-3-94	571.999	53530.8	1.63504	19.8824	1.72769	0.25294	2.6128	0.0364742	1.96006	0.750175	230.941	4.44647	228.962	5.35584	208.688	40.0643	230.941	4.44647
TBP-12-3-34	88.1063	15835.8	1.64662	18.388	6.80884	0.357599	6.99243	0.0476902	1.59181	0.227648	300.325	4.67096	310.42	18.7039	386.933	153.084	300.325	4.67096
TBP-12-3-91	297.486	107835	9.92006	18.0875	2.02411	0.507582	2.31916	0.0665861	1.13203	0.488119	415.555	4.55578	416.822	7.92857	423.818	45.1783	415.555	4.55578
TBP-12-3-27	92.2229	24486.4	1.81797	17.5138	5.34388	0.573142	5.52941	0.0728017	1.42034	0.256871	453.013	6.21346	460.045	20.4579	495.336	117.848	453.013	6.21346
TBP-12-3-17	160.566	46960.1	1.33937	17.9644	2.44712	0.596856	2.59805	0.0777647	0.872618	0.335874	482.766	4.05883	475.237	9.86042	439.029	54.4772	482.766	4.05883
TBP-12-3-33	158.763	43666.3	0.798801	16.9734	2.54011	0.713302	4.16332	0.0878091	3.29864	0.792311	542.567	17.1649	546.705	17.6016	563.968	55.3221	542.567	17.1649
TBP-12-3-15	96.5161	12034.5	0.538198	15.9241	7.58066	0.774706	9.65116	0.0894725	5.97315	0.618905	552.416	31.6226	582.459	42.8033	701.419	161.627	552.416	31.6226
TBP-12-3-19	64.812	34030.2	0.787589	17.0446	5.2661	0.730177	5.53493	0.0902639	1.704	0.307863	557.097	9.09433	556.657	23.7224	554.835	114.979	557.097	9.09433
TBP-12-3-59	93.3755	1934.98	1.53094	15.3496	4.28398	0.874937	6.91992	0.097403	5.43441	0.785328	599.172	31.0943	638.245	32.7999	779.109	90.109	599.172	31.0943
TBP-12-3-85	110.973	67839.4	2.39892	14.0446	1.3252	1.55186	1.52354	0.158074	0.751681	0.493377	946.062	6.61416	951.233	9.4079	963.236	27.085	963.236	27.085
TBP-12-3-63	66.4687	105475	1.2151	13.8169	2.00418	1.67232	2.64438	0.167583	1.7251	0.652367	998.779	15.9616	998.069	16.8044	996.517	40.7265	996.517	40.7265
TBP-12-3-9	62.9299	43783.1	1.92097	13.6862	2.44911	1.79727	2.84343	0.1784	1.44464	0.508061	1058.23	14.0987	1044.47	18.5524	1015.78	49.6358	1015.78	49.6358
TBP-12-3-48	147.06	37032.2	2.16996	13.5577	0.774203	1.73655	1.34964	0.170755	1.1055	0.81911	1016.27	10.3941	1022.19	8.69646	1034.86	15.6593	1034.86	15.6593
TBP-12-3-96	184.473	129641	2.11912	13.4649	0.585267	1.85735	1.15415	0.181383	0.994746	0.861888	1074.53	9.84549	1066.05	7.61781	1048.75	11.8177	1048.75	11.8177
TBP-12-3-45	74.6644	43402.1	1.54747	13.3873	2.10449	1.76564	2.40433	0.171433	1.16272	0.483593	1020	10.9691	1032.92	15.5871	1060.39	42.3641	1060.39	42.3641
TBP-12-3-52	54.7986	21669.9	2.32557	13.2789	1.72903	1.91665	2.85224	0.184589	2.26842	0.795311	1091.99	22.7867	1086.9	19.0338	1076.73	34.7125	1076.73	34.7125
TBP-12-3-4	157.277	107510	2.01782	13.1037	0.800743	1.95254	1.29432	0.185563	1.01689	0.785659	1097.3	10.2603	1099.32	8.69131	1103.33	16.0303	1103.33	16.0303
TBP-12-3-6	149.095	165315	1.5517	13.0772	1.12192	1.9852	1.64508	0.188285	1.20315	0.731365	1112.08	12.2895	1110.49	11.1088	1107.38	22.4111	1107.38	22.4111
TBP-12-3-8	224.387	217356	2.24294	12.8863	0.4167	2.0511	0.721312	0.191696	0.588772	0.816252	1130.56	6.1054	1132.66	4.92365	1136.71	8.29102	1136.71	8.29102
TBP-12-3-80	48.8747	60412.7	1.07149	12.8673	2.44753	2.12977	2.79607	0.198756	1.3519	0.483498	1168.63	14.4494	1158.51	19.322	1139.63	48.7022	1139.63	48.7022
TBP-12-3-2	112.962	73959.8	2.90386	12.8623	1.25902	2.09908	3.36051	0.195815	3.11575	0.927166	1152.8	32.8902	1148.51	23.1157	1140.39	25.0369	1140.39	25.0369
TBP-12-3-66	48.688	32413.2	2.38764	12.6137	3.60395	2.15674	4.17467	0.197306	2.10699	0.504708	1160.83	22.383	1167.22	28.9687	1179.12	71.2855	1179.12	71.2855
TBP-12-3-58	108.534	91650.5	2.28397	12.5383	1.16343	2.13671	1.44153	0.194305	0.851138	0.590442	1144.66	8.92664	1160.76	9.97099	1190.94	22.9698	1190.94	22.9698
TBP-12-3-78	59.7497	125548	1.77706	12.3265	2.12092	2.38646	2.33966	0.213351	0.987781	0.422189	1246.65	11.1966	1238.55	16.7429	1224.48	41.6497	1224.48	41.6497
TBP-12-3-44	242.549	6535.57	1.89493	12.2111	1.46558	2.03961	1.7726	0.180634	0.997086	0.5625	1070.44	9.8341	1128.83	12.0779	1242.95	28.7338	1242.95	28.7338
TBP-12-3-101	52.0672	60856.2	1.82202	12.1613	2.25354	2.21343	3.289	0.19523	2.39563	0.728378	1149.64	25.2252	1185.3	23.0073	1250.93	44.0876	1250.93	44.0876
TBP-12-3-57	144.186	127007	0.773543	12.1305	0.840955	2.48662	1.31171	0.21877	1.00667	0.767446	1275.37	11.6485	1268.14	9.49916	1255.92	16.4629	1255.92	16.4629
TBP-12-3-99	58.8768	49812.4	1.47918	11.9381	2.35508	2.51299	2.57225	0.217582	1.03444	0.402153	1269.09	11.9165	1275.79	18.6855	1287.09	45.8575	1287.09	45.8575
TBP-12-3-43	114.309	72235.2	2.0087	11.8929	1.03477	2.5271	1.37902	0.217977	0.911563	0.661021	1271.18	10.5166	1279.87	10.0328	1294.47	20.1077	1294.47	20.1077
TBP-12-3-36	63.5825	82934.4	0.906221	11.657	2.63359	2.39897	10.047	0.202821	9.69565	0.965033	1190.45	105.401	1242.29	72.1226	1333.33	50.9498	1333.33	50.9498
TBP-12-3-39	90.4467	57284.8	2.27433	11.2623	1.00225	2.95661	1.41191	0.241502	0.994475	0.704349	1394.5	12.4706	1396.54	10.7133	1399.65	19.2089	1399.65	19.2089
TBP-12-3-13	493.027	78844.4	1.18773	11.2445	0.328849	2.97819	1.6485	0.242879	1.61537	0.979901	1401.65	20.3494	1402.07	12.5316	1402.69	6.2999	1402.69	6.2999
TBP-12-3-70	90.4506	98419.3	1.63056	11.2129	0.888086	3.04593	1.37171	0.247705	1.04541	0.762125	1426.63	13.3792	1419.21	10.486	1408.08	17.0012	1408.08	17.0012
TBP-12-3-20	27.1029	21270.3	1.3474	11.1883	3.02955	2.94564	3.60388	0.239025	1.95186	0.5416	1381.63	24.2735	1393.73	27.3254	1412.27	57.9768	1412.27	57.9768
TBP-12-3-62	162.985	163795	1.24449	11.1624	0.704448	3.04296	3.05949	0.246349	2.97728	0.973131	1419.62	37.9363	1418.47	23.3858	1416.71	13.4698	1416.71	13.4698
TBP-12-3-29	67.8561	74538.5	3.03694	10.6359	0.781972	3.46743	1.28818	0.267474	1.02368	0.794673	1527.97	13.926	1519.84	10.1524	1508.52	14.7672	1508.52	14.7672
TBP-12-3-84	355.093	87872.5	1.81028	10.3688	0.294246	3.36831	1.56984	0.253304	1.54202	0.982277	1455.49	20.0907	1497.06	12.2915	1556.4	5.52217	1556.4	5.52217
TBP-12-3-89	89.6377	115606	1.04917	9.99436	0.569251	4.06074	1.69339	0.294347	1.59485	0.941805	1663.21	23.3802	1646.46	13.7977	1625.12	10.5865	1625.12	10.5865
TBP-12-3-47	120.578	196540	0.605014	9.70963	0.902748	4.2035	1.85084	0.296014	1.61575	0.872983	1671.51	23.7901	1674.7	15.1826	1678.68	16.6751	1678.68	16.6751
TBP-12-3-11	75.4261	88713.8	1.05848	9.70829	1.17259	4.25164	3.65882	0.299363	3.46583	0.947254	1688.15	51.4757	1684.05	30.0856	1678.94	21.6595	1678.94	21.6595
TBP-12-3-49	142.94	123485	2.32753	9.67126	0.564912	4.27648	1.00947	0.299964	0.836604	0.828755	1691.13	12.4445	1688.85	8.3076	1686	10.426	1686	10.426
TBP-12-3-25	62.0118	94792.5	0.671461	9.64778	0.899619	4.34074	1.18358	0.303732	0.769124	0.649827	1709.79	11.5509	1701.14	9.76796	1690.48	16.5923	1690.48	16.5923
TBP-12-3-31	141.792	175434	3.57019	9.64677	0.662732	4.29973	2.73622	0.300831	2.65475	0.970225	1695.43	39.5776	1693.31	22.5445	1690.68	12.2241	1690.68	12.2241
TBP-12-3-102	146.55	119816	1.95089	9.64373	0.453654	4.46195	1.75881	0.312082	1.69929	0.966163	1750.94	26.0553	1723.92	14.59	1691.26	8.36698	1691.26	8.36698
TBP-12-3-46	69.6515	69341.4	0.539044	9.61736	0.82322	4.23118	1.5621	0.295132	1.32758	0.849869	1667.12	19.5022	1680.09	12.8299	1696.3	15.1719	1696.3	15.1719
TBP-12-3-98	195.777	89269.1	2.47263	9.60699	0.330192	4.3967	2.45496	0.306346	2.43265	0.990914	1722.7	36.7753	1711.72	20.3109	1698.29	6.08272	1698.29	6.08272
TBP-12-3-103	79.8172	9238.65	1.8992	9.60277	0.865186	4.2674	1.33925	0.297207	1.02227	0.763318	1677.44	15.0986	1687.1	11.0173	1699.1	15.9398	1699.1	15.9398
TBP-12-3-100	590.636	325734	1.89698	9.54341	0.306119	4.45401	1.05039	0.308286	1.00479	0.956591	1732.26	15.2632	1722.45	8.71013	1710.52	5.63223	1710.52	5.63223
TBP-12-3-71	129.891	172250	0.79506	9.51555	0.39472	4.48891	0.836758	0.309795	0.737807	0.881745	1739.7	11.2495	1728.92	6.9485	1715.89	7.25746	1715.89	7.25746
TBP-12-3-82	162.594	282209	1.38227	9.47431	0.370528	4.53691	0.658289	0.31175	0.544108	0.826549	1749.31	8.33603	1737.76	5.47701	1723.88	6.8058	1723.88	6.8058
TBP-12-3-26	256.753	235765	0.525367	9.45798	0.341887	4.47479	0.866226	0.306952	0.795902	0.918816	1725.69	12.0501	1726.31	7.18908	1727.04	6.27722	1727.04	6.27722
TBP-12-3-93	120.333	32721.4	2.62917	9.43398	0.617583	4.34683	1.27109	0.297417	1.11098	0.874033	1678.49	16.4176	1702.29	10.493	1731.71	11.3308	1731.71	11.3308
TBP-12-3-12	171.504	266816	1.83738	9.4062	0.708856	4.58004	6.06436	0.312451	6.02279	0.993145	1752.76	92.4368	1745.64	50.5832	1737.12	12.9969	1737.12	12.9969
TBP-12-3-53	63.2023	113294	2.3606	9.33592	1.25422	4.5794	1.64407	0.310073	1.06297	0.646547	1741.07	16.2184	1745.53	13.7024	1750.85	22.9588	1750.85	22.9588
TBP-12-3-16	292.803	258739	4.54674	9.29571	0.269095	4.72759	0.736538	0.318729	0.685621	0.93087	1783.52	10.6824	1772.14	6.17303	1758.75	4.92122	1758.75	4.92122
TBP-12-3-1	224.808	19967.1	1.62607	9.2929	0.890938	4.65601	1.5624	0.313808	1.28348	0.82148	1759.42	19.7625	1759.37	13.0602	1759.3	16.2927	1759.3	16.2927
TBP-12-3-22	110.247	38163	2.70001	9.2164	0.512956	4.7489	3.14758	0.317434	3.1055	0.986631	1777.18	48.2372	1775.91	26.4066	1774.41	9.36097	1774.41	9.36097
TBP-12-3-21	409.808	458058	3.57212	9.17643	0.204596	4.53459	0.713878	0.301794	0.683931	0.958051	1700.2	10.2211	1737.34	5.93897	1782.33	3.72895	1782.33	3.72895
TBP-12-3-77	116.507	111687	1.03436	9.13233	0.611843	4.94605	1.59584	0.327596	1.4739	0.923583	1826.72	23.4455	1810.15	13.4796	1791.11	11.1448	1791.11	11.1448
TBP-12-3-83	282.164	62778.6	2.41676	9.11248	0.403841	4.83888	1.12576	0.319801	1.05083	0.933442	1788.76	16.4143	1791.68	9.47333	1795.07	7.3524	1795.07	7.3524
TBP-12-3-28	50.1008	55322.4	1.00869	8.37224	1.20847	5.79049	1.43149	0.351606	0.767307	0.53602	1942.26	12.8675	1944.99	12.3952	1947.88	21.5975	1947.88	21.5975
TBP-12-3-14	160.31	156866	1.64997	7.70252	1.50699	6.70083	2.47028	0.374335	1.95736	0.792362	2049.77	34.3684	2072.73	21.829	2095.62	26.4794	2095.62	26.4794
TBP-12-3-69	45.9009	115395	1.08346	5.39843	0.629661	13.4807	0.830811	0.52781	0.54201	0.652386	2732.22	12.0707	2713.93	7.85351	2700.33	10.3978	2700.33	10.3978
TBP-12-3-95	21.957	42771	0.686886	5.05977	0.80946	14.9537	1.10259	0.548756	0.748651	0.678993	2820	17.1	2812.3	10.4941	2806.77	13.2365	2806.77	13.2365
TBP-12-3-55	58.4986	86118.4	1.25666	5.05271	0.231044	14.4954	0.661023	0.531193	0.61933	0.936927	2746.48	13.8504	2782.7	6.27884	2809.06	3.77724	2809.06	3.77724
TBP-12-3-41	290.028	347016	1.84998	3.84264	0.329532	21.147	1.78373	0.589356	1.75303	0.982787	2986.81	41.9054	3145.36	17.2956	3248.14	5.19171	3248.14	5.19171
Lower Crouse Canyon, Tbp 12-4. U-Pb geochronologic analyses.
							Isotope ratios						Apparent ages (Ma)
Analysis	U	206Pb	U/Th	206Pb*	±	207Pb*	±	206Pb*	±	error	206Pb*	±	207Pb*	±	206Pb*	±	Best age	±
	(ppm)	204Pb		207Pb*	(%)	235U*	(%)	238U	(%)	corr.	238U*	(Ma)	235U	(Ma)	207Pb*	(Ma)	(Ma)	(Ma)
TPB-12-4-16	140.982	562.234	1.62256	2.47004	443.913	0.0550881	449.43	0.000986871	70.203	0.156205	6.35864	4.46176	54.4492	242.789	3927.2	526.628	6.35864	4.46176
TPB-12-4-38	102.719	632.122	1.10621	-0.141121	6811.53	-1.04038	6812.11	0.00106484	89.0377	0.0130705	6.86076	6.10541	NA	NA	NA	NA	6.86076	6.10541
TPB-12-4-58	72.6292	556.449	1.04049	1.7518	228.17	0.084272	237.058	0.0010707	64.3044	0.27126	6.89848	4.43366	82.1534	189.242	NA	NA	6.89848	4.43366
TPB-12-4-74	68.6449	537.028	1.3018	1.67975	217.31	0.0901064	223.341	0.00109774	51.5515	0.23082	7.07259	3.64403	87.6025	189.624	NA	NA	7.07259	3.64403
TPB-12-4-92	100.077	520.454	1.5542	2.20702	224.02	0.0768969	229.93	0.00123088	51.7968	0.225272	7.92986	4.10489	75.2233	168.232	4095.4	1112.59	7.92986	4.10489
TPB-12-4-8	100.534	316.553	1.98357	4.66495	169.965	0.0374583	174.884	0.00126734	41.1872	0.235512	8.16464	3.36066	37.3395	64.2001	2938.82	591.129	8.16464	3.36066
TPB-12-4-31	65.4356	587.341	1.09509	1.66488	143.665	0.105703	161.774	0.00127635	74.3715	0.459725	8.22265	6.11141	102.027	158.302	NA	NA	8.22265	6.11141
TPB-12-4-54	75.0726	286.165	1.26516	0.0226351	22036.7	8.05017	22036.8	0.00132156	42.606	0.00193341	8.51367	3.62494	2236.67	NA	NA	NA	8.51367	3.62494
TPB-12-4-2	65.7416	318.768	1.11984	0.766616	545.147	0.244273	550.77	0.00135817	78.498	0.142524	8.74935	6.86341	221.914	NA	NA	NA	8.74935	6.86341
TPB-12-4-51	441.927	2552.46	1.43942	21.4537	64.642	0.00887231	66.074	0.0013805	13.6815	0.207063	8.89315	1.21587	8.96907	5.90019	29.3927	1731.53	8.89315	1.21587
TPB-12-4-5	645.337	2685.1	0.549684	20.684	36.3231	0.00950663	37.4323	0.00142613	9.04486	0.241633	9.1869	0.830351	9.60727	3.57928	116.241	882.571	9.1869	0.830351
TPB-12-4-10	72.884	516.128	1.27327	2.39359	229.974	0.0827865	242.363	0.00143717	76.4968	0.315629	9.25795	7.07696	80.7614	190.353	3974.35	1025.71	9.25795	7.07696
TPB-12-4-72	67.099	176.316	1.55958	0.288556	1187.78	0.710165	1189.37	0.00148624	61.5706	0.0517674	9.5738	5.89028	544.844	NA	NA	NA	9.5738	5.89028
TPB-12-4-56	99.7891	72.899	1.18195	5.34682	35.4906	0.0392361	50.5628	0.00152153	36.014	0.712263	9.80096	3.52704	39.078	19.3859	2716.18	607.238	9.80096	3.52704
TPB-12-4-1	56.7102	502.205	1.53699	1.66978	158.552	0.125867	173.762	0.00152429	71.0947	0.40915	9.81875	6.97531	120.377	199.785	NA	NA	9.81875	6.97531
TPB-12-4-18	66.7948	604.192	1.56447	-2.57232	308.634	-0.0909339	311.7	0.00169648	43.6127	0.139919	10.927	4.7615	-96.804	-327.492	NA	NA	10.927	4.7615
TPB-12-4-93	96.3984	480.875	1.3553	-2.05767	286.655	-0.11767	290.27	0.00175607	45.6651	0.15732	11.3104	5.16037	-127.115	-414.681	NA	NA	11.3104	5.16037
TPB-12-4-97	70.1788	1299.67	1.67101	2.26109	747.355	0.272358	747.541	0.00446639	16.7138	0.0223584	28.7281	4.79087	244.577	#NUM!	4059.39	146.951	28.7281	4.79087
TPB-12-4-27	361.286	3987.4	1.63751	25.3753	26.4999	0.0243736	27.2203	0.0044857	6.22099	0.228542	28.852	1.79087	24.4518	6.57644	-389.564	699.747	28.852	1.79087
TPB-12-4-44	642.198	1899.37	0.997304	20.8841	17.0153	0.0300965	17.5637	0.0045586	4.35476	0.24794	29.3198	1.27391	30.1087	5.21062	93.5299	405.473	29.3198	1.27391
TPB-12-4-3	122.469	1251.97	1.75104	4.07998	381.601	0.160715	381.791	0.00475568	12.0532	0.03157	30.5844	3.67766	151.328	597.298	3153.38	117.973	30.5844	3.67766
TPB-12-4-34	298.125	13883.3	1.90676	21.6947	29.2346	0.0312889	30.0355	0.00492314	6.88991	0.229392	31.6588	2.17591	31.2833	9.25308	2.54553	717.561	31.6588	2.17591
TPB-12-4-96	567.158	15609.7	2.37156	19.8371	10.1295	0.0342278	11.2922	0.00492444	4.99059	0.441951	31.6671	1.5765	34.1728	3.79466	213.987	235.155	31.6671	1.5765
TPB-12-4-24	516.346	12496.4	0.680758	23.5325	16.6717	0.0323519	16.9657	0.00552162	3.1447	0.185357	35.4967	1.1132	32.3294	5.39856	-197.12	419.895	35.4967	1.1132
TPB-12-4-39	422.598	6414.25	1.83915	24.3282	15.6009	0.032181	15.7672	0.00567818	2.28396	0.144856	36.5004	0.8313	32.1613	4.9915	-281.092	399.216	36.5004	0.8313
TPB-12-4-103	562.47	16191.1	0.746186	19.7099	8.13854	0.050363	8.59349	0.00719936	2.75902	0.321059	46.2438	1.27131	49.8917	4.18383	228.845	188.276	46.2438	1.27131
TPB-12-4-22	359.651	5855.19	1.99195	22.1134	16.3076	0.0472993	16.7714	0.00758592	3.91709	0.233557	48.7174	1.90111	46.9256	7.69115	-43.6849	398.579	48.7174	1.90111
TPB-12-4-30	35.2823	221.296	0.752779	8.14403	30.1874	0.149929	36.5393	0.00885574	20.5874	0.563433	56.8364	11.6497	141.849	48.4099	1997.13	549.981	56.8364	11.6497
TPB-12-4-79	129.426	5602.15	0.690569	23.708	31.837	0.0694888	32.1482	0.0119484	4.46202	0.138795	76.5676	3.39625	68.2143	21.2123	-215.76	817.724	76.5676	3.39625
TPB-12-4-102	92.7715	944.216	1.01997	28.1857	34.2343	0.060328	35.9233	0.0123324	10.8855	0.303021	79.0133	8.5485	59.4794	20.7561	-670.96	967.723	79.0133	8.5485
TPB-12-4-7	163.907	14953	1.47957	20.2708	12.6842	0.107238	13.2646	0.0157659	3.88103	0.292584	100.841	3.88321	103.436	13.0454	163.619	297.554	100.841	3.88321
TPB-12-4-59	78.7891	11952.1	1.10604	22.0897	17.3065	0.149196	18.042	0.0239027	5.09892	0.282614	152.274	7.67334	141.202	23.788	-41.0845	423.089	152.274	7.67334
TPB-12-4-21	221.327	19630.2	1.09351	20.7824	7.53599	0.162239	7.82558	0.024454	2.10917	0.269522	155.744	3.24554	152.661	11.0924	105.037	178.288	155.744	3.24554
TPB-12-4-62	89.3028	6497.28	0.492316	25.0036	23.8216	0.139597	23.9516	0.025315	2.4925	0.104064	161.16	3.96712	132.685	29.7999	-351.302	622.403	161.16	3.96712
TPB-12-4-52	69.9214	7219.61	1.80369	18.6727	19.7244	0.191222	21.1465	0.0258967	7.62367	0.360517	164.816	12.4058	177.672	34.4811	352.356	449.538	164.816	12.4058
TPB-12-4-36	379.734	24929	1.07752	20.2785	4.52499	0.178848	4.76482	0.0263039	1.49266	0.313266	167.374	2.46616	167.069	7.34025	162.727	105.849	167.374	2.46616
TPB-12-4-65	305.544	33027.8	1.15756	20.9717	4.8925	0.17858	4.98349	0.0271622	0.947986	0.190225	172.763	1.61602	166.838	7.66734	83.5577	116.14	172.763	1.61602
TPB-12-4-105	180.372	22098	2.2944	19.8031	4.6851	0.191739	5.06371	0.0275386	1.92119	0.379404	175.125	3.3192	178.112	8.27251	217.962	108.484	175.125	3.3192
TPB-12-4-42	626.868	40604	1.34835	19.7919	1.77705	0.194047	2.0005	0.0278543	0.918749	0.459259	177.105	1.60501	180.076	3.30107	219.233	41.1486	177.105	1.60501
TPB-12-4-94	295.475	21412.2	0.871355	19.7769	7.66459	0.195772	7.96464	0.0280806	2.16553	0.271893	178.524	3.81296	181.542	13.2411	221.013	177.527	178.524	3.81296
TPB-12-4-17	77.5214	3911.76	1.45492	19.447	18.2923	0.204329	18.9296	0.028819	4.87046	0.257294	183.153	8.79486	188.782	32.6216	259.767	423.282	183.153	8.79486
TPB-12-4-73	566.209	238326	3.62939	19.7565	2.21249	0.264773	2.50171	0.0379387	1.16767	0.466749	240.043	2.75137	238.506	5.31779	223.394	51.1669	240.043	2.75137
TPB-12-4-32	38.4506	8384.48	14.4855	18.7449	18.2818	0.483469	19.0893	0.0657282	5.49336	0.287772	410.368	21.8405	400.45	63.2515	343.625	416.771	410.368	21.8405
TPB-12-4-9	180.979	765.92	1.78669	14.0274	25.124	0.724602	25.4043	0.0737184	3.76328	0.148135	458.519	16.656	553.38	108.794	965.732	520.822	458.519	16.656
TPB-12-4-100	102.989	31465.2	0.991018	17.2507	3.97161	0.719548	4.15658	0.0900256	1.22616	0.294993	555.688	6.52824	550.4	17.6626	528.595	87.0648	555.688	6.52824
TPB-12-4-4	110.189	37929.5	0.667098	16.6017	3.21296	0.828262	3.39736	0.0997283	1.10408	0.32498	612.817	6.45431	612.647	15.6291	612	69.4192	612.817	6.45431
TPB-12-4-47	93.492	13747.7	0.923382	14.3279	6.87209	1.37239	8.2084	0.142613	4.48914	0.546895	859.423	36.1199	877.188	48.2511	922.311	141.415	859.423	36.1199
TPB-12-4-68	47.0116	21238.2	0.983416	14.2789	4.57897	1.51003	5.01746	0.156379	2.05132	0.408836	936.624	17.8826	934.453	30.6586	929.355	94.0342	929.355	94.0342
TPB-12-4-91	93.8128	100155	4.24467	13.4979	2.1942	1.8021	2.45679	0.176418	1.10513	0.449827	1047.38	10.6835	1046.22	16.0446	1043.78	44.2873	1043.78	44.2873
TPB-12-4-19	42.7248	29359	1.94812	12.7776	1.56564	2.1411	2.22188	0.198419	1.57655	0.709557	1166.82	16.8268	1162.18	15.3794	1153.52	31.0932	1153.52	31.0932
TPB-12-4-49	36.2345	27468	1.51817	12.4879	2.75607	2.35353	4.67042	0.213161	3.77053	0.807321	1245.64	42.7087	1228.63	33.2934	1198.87	54.3323	1198.87	54.3323
TPB-12-4-55	196.872	168562	2.36801	12.2419	0.843566	2.43896	2.51464	0.216548	2.36892	0.942054	1263.61	27.1829	1254.17	18.1104	1238.03	16.5206	1238.03	16.5206
TPB-12-4-84	106.471	125971	1.23231	12.2221	1.76992	2.43413	1.89918	0.215769	0.688671	0.362615	1259.48	7.87894	1252.74	13.6694	1241.17	34.6691	1241.17	34.6691
TPB-12-4-43	208.774	227907	2.22726	11.3457	0.446172	2.93198	1.20232	0.241263	1.11647	0.928596	1393.26	13.9892	1390.2	9.10355	1385.5	8.56757	1385.5	8.56757
TPB-12-4-80	79.8539	5835.19	0.605357	11.0351	1.44	3.05664	1.97019	0.244635	1.34464	0.682489	1410.75	17.0373	1421.9	15.0747	1438.61	27.454	1438.61	27.454
TPB-12-4-86	271.326	5264.84	3.48735	10.7356	0.359947	3.13077	1.02251	0.243767	0.957057	0.935991	1406.25	12.0919	1440.28	7.8691	1490.89	6.81409	1490.89	6.81409
TPB-12-4-64	20.6559	24006.4	0.661375	10.7163	4.37377	3.37801	4.54346	0.262544	1.23011	0.270742	1502.85	16.4899	1499.31	35.6106	1494.29	82.7973	1494.29	82.7973
TPB-12-4-104	97.7261	241609	1.02583	10.141	1.77794	3.78397	2.06558	0.278309	1.05144	0.50903	1582.84	14.7569	1589.35	16.5909	1597.98	33.1855	1597.98	33.1855
TPB-12-4-77	150.494	7009.71	0.939808	10.1161	1.47234	3.76736	1.9789	0.276407	1.32221	0.668157	1573.24	18.4579	1585.82	15.8799	1602.56	27.4655	1602.56	27.4655
TPB-12-4-14	77.8047	45083.2	0.870376	9.67832	0.927574	4.28713	1.45788	0.30093	1.12474	0.771486	1695.92	16.7719	1690.89	12.0038	1684.65	17.1224	1684.65	17.1224
TPB-12-4-71	100.287	109171	1.13258	9.66772	0.529741	4.24846	1.29456	0.297889	1.18121	0.912443	1680.83	17.4769	1683.44	10.6406	1686.67	9.776	1686.67	9.776
TPB-12-4-25	271.831	400382	1.08398	9.66464	0.192088	4.28776	1.24234	0.300549	1.2274	0.987974	1694.03	18.2849	1691.01	10.2292	1687.26	3.54456	1687.26	3.54456
TPB-12-4-99	93.8468	74343.8	3.14989	9.65755	0.835195	4.34533	1.67677	0.30436	1.45396	0.867121	1712.89	21.8707	1702.01	13.8413	1688.61	15.4076	1688.61	15.4076
TPB-12-4-37	105.034	220267	1.4328	9.63235	0.595523	4.31632	1.15931	0.30154	0.99466	0.857977	1698.94	14.8553	1696.48	9.5575	1693.43	10.9788	1693.43	10.9788
TPB-12-4-61	285.875	17075.7	1.22949	9.60155	1.3399	4.45336	5.42703	0.310118	5.25902	0.969042	1741.29	80.2532	1722.32	45.0298	1699.34	24.6866	1699.34	24.6866
TPB-12-4-50	612.649	291783	6.67799	9.53871	0.228366	4.41555	1.10659	0.305473	1.08277	0.978474	1718.39	16.3328	1715.26	9.16158	1711.42	4.20118	1711.42	4.20118
TPB-12-4-29	112.223	125923	1.49456	9.53316	0.772279	4.46601	1.49734	0.308784	1.28281	0.856729	1734.72	19.5106	1724.68	12.4228	1712.49	14.2039	1712.49	14.2039
TPB-12-4-23	110.791	82657.4	1.2489	9.5051	0.575731	4.51116	1.0853	0.310988	0.920007	0.847697	1745.57	14.0687	1733.03	9.02063	1717.91	10.5829	1717.91	10.5829
TPB-12-4-12	65.9087	117675	1.0328	9.49613	0.882272	4.39728	1.32794	0.302851	0.992484	0.747385	1705.43	14.8723	1711.83	10.9859	1719.65	16.2143	1719.65	16.2143
TPB-12-4-83	158.954	38605.9	1.90656	9.43746	0.569037	4.57831	2.68376	0.313371	2.62274	0.977263	1757.27	40.3414	1745.33	22.369	1731.03	10.4426	1731.03	10.4426
TPB-12-4-70	156.864	191306	1.10195	9.39307	0.342764	4.53039	1.19343	0.308632	1.14315	0.957868	1733.97	17.3799	1736.57	9.92708	1739.68	6.2816	1739.68	6.2816
TPB-12-4-53	486.753	640121	1.17072	9.32887	0.142867	4.54962	1.41616	0.307824	1.40893	0.994898	1729.99	21.3778	1740.09	11.7889	1752.24	2.61488	1752.24	2.61488
TPB-12-4-78	321.517	35605.4	2.0713	9.11611	0.12948	4.75159	1.01621	0.314157	1.00792	0.991849	1761.13	15.5327	1776.39	8.52459	1794.35	2.35754	1794.35	2.35754
TPB-12-4-87	191.269	262265	1.49621	9.06938	0.77446	5.0698	3.67245	0.333478	3.58987	0.977511	1855.22	57.8748	1831.07	31.1558	1803.7	14.0833	1803.7	14.0833
TPB-12-4-89	284.445	295653	1.95681	9.02722	0.206186	4.95344	1.3617	0.32431	1.346	0.98847	1810.74	21.2489	1811.41	11.5046	1812.17	3.74595	1812.17	3.74595
TPB-12-4-98	46.9047	55124.4	1.68714	8.02228	1.05429	5.89958	5.2512	0.343256	5.14428	0.979638	1902.31	84.7474	1961.17	45.6225	2023.86	18.6774	2023.86	18.6774
TPB-12-4-69	232.559	2773.64	0.965682	5.58471	0.541985	10.2888	7.79782	0.416738	7.77896	0.997582	2245.66	147.533	2461.1	72.2858	2644.17	8.99415	2644.17	8.99415
TPB-12-4-13	46.3386	68509.5	0.499338	5.42619	0.623836	13.2876	1.01149	0.522926	0.796204	0.78716	2711.58	17.624	2700.3	9.55194	2691.86	10.3063	2691.86	10.3063
TPB-12-4-11	31.3409	43026.2	0.88833	5.3785	0.797211	13.3403	3.91709	0.520386	3.83511	0.979071	2700.82	84.6238	2704.04	37.0163	2706.44	13.157	2706.44	13.157
Vermillion Ck, Tbp 12-5. U-Pb geochronologic analyses.
							Isotope ratios						Apparent ages (Ma)
Analysis	U	206Pb	U/Th	206Pb*	±	207Pb*	±	206Pb*	±	error	206Pb*	±	207Pb*	±	206Pb*	±	Best age	±
	(ppm)	204Pb		207Pb*	(%)	235U*	(%)	238U	(%)	corr.	238U*	(Ma)	235U	(Ma)	207Pb*	(Ma)	(Ma)	(Ma)
TBP12-5-27	94.8986	354.373	1.71295	-0.233081	1426.33	-1.16197	1427.4	0.00196427	55.0805	0.0385881	12.6501	6.9609	#NUM!	#NUM!	NA	NA	12.6501	6.9609
TBP12-5-33	122.453	585.585	1.21995	1.93479	232.726	0.151435	235.867	0.002125	38.3633	0.162648	13.6841	5.24411	143.178	325.712	NA	NA	13.6841	5.24411
TBP12-5-21	96.1392	674.704	1.66899	2.49933	131.36	0.118755	140.287	0.00215266	49.2435	0.351019	13.862	6.81882	113.943	152.338	3909.49	1293.13	13.862	6.81882
TBP12-5-53	71.1259	263.364	1.54385	1.09595	229.252	0.274233	232.12	0.00217976	36.3725	0.156697	14.0363	5.09981	246.072	557.154	NA	NA	14.0363	5.09981
TBP12-5-54	74.0909	713.005	1.16497	3.73529	202.24	0.119629	204.25	0.00324085	28.5787	0.13992	20.8581	5.95133	114.735	225.213	3292.69	697.51	20.8581	5.95133
TBP12-5-86	159.257	1216.2	1.1877	-1.92865	1206.97	-0.297212	1207	0.00415737	8.3293	0.00690081	26.7446	2.22302	-358.126	#NUM!	NA	NA	26.7446	2.22302
TBP12-5-18	178.933	2345.78	0.741089	13.8244	130.632	0.0415623	131.857	0.0041672	17.9313	0.135991	26.8077	4.797	41.3482	53.4747	995.388	512.159	26.8077	4.797
TBP12-5-46	188.716	2729.06	1.38779	15.2688	99.2073	0.0390029	99.8739	0.00431918	11.5194	0.11534	27.7833	3.19358	38.8501	38.0861	790.193	NA	27.7833	3.19358
TBP12-5-10	125.44	1491.07	1.03135	-7.20626	582.426	-0.0848268	582.584	0.00443345	13.5582	0.0232726	28.5167	3.85782	-90.0055	-613.439	NA	NA	28.5167	3.85782
TBP12-5-102	163.865	1861.72	2.43022	19.7663	85.8544	0.032025	90.7787	0.00459106	29.4924	0.324883	29.5282	8.68866	32.0078	28.6107	222.269	2604.07	29.5282	8.68866
TBP12-5-36	556.179	5849.02	2.09748	33.0804	41.3443	0.0191594	41.8588	0.00459676	6.54297	0.15631	29.5647	1.92998	19.2701	7.99035	NA	NA	29.5647	1.92998
TBP12-5-76	375.123	5850.36	0.487019	28.3331	70.2346	0.0238514	70.5716	0.00490125	6.88834	0.0976078	31.5183	2.16579	23.934	16.6946	-685.372	2207.72	31.5183	2.16579
TBP12-5-62	173.403	1578.03	1.38837	17.5575	52.8087	0.0391386	54.8406	0.00498388	14.7898	0.269686	32.0484	4.72812	38.9827	20.9762	489.811	1251.62	32.0484	4.72812
TBP12-5-34	293.309	7318.46	0.812953	20.4076	35.0879	0.0345036	36.3929	0.00510689	9.65848	0.265394	32.8373	3.16352	34.4435	12.3254	147.89	845.885	32.8373	3.16352
TBP12-5-81	150.793	2377.01	0.792969	18.8378	82.2736	0.0386211	83.3848	0.00527659	13.5677	0.162711	33.9257	4.59083	38.4769	31.4937	332.406	2359.19	33.9257	4.59083
TBP12-5-8	149.184	2759.29	0.701045	24.0148	63.7665	0.0312343	65.1501	0.00544013	13.3552	0.204992	34.9743	4.65825	31.2296	20.039	-248.18	1789.04	34.9743	4.65825
TBP12-5-39	134.735	1700.29	1.68917	13.2931	83.3185	0.0603502	83.662	0.0058184	7.57308	0.09052	37.3991	2.82407	59.5006	48.3855	1074.59	2186.85	37.3991	2.82407
TBP12-5-63	168.723	2290.51	0.831964	7.72817	141.432	0.105099	142.602	0.00589081	18.2339	0.127865	37.8632	6.8837	101.472	138.56	2089.77	177.058	37.8632	6.8837
TBP12-5-87	136.576	1715.38	0.590918	6.67268	176.701	0.122678	177.59	0.00593697	17.743	0.0999099	38.159	6.75054	117.497	199.573	2344.37	188.87	38.159	6.75054
TBP12-5-59	370.382	11954.2	1.78911	20.8971	41.7549	0.0394513	43.2184	0.00597924	11.1514	0.258024	38.4299	4.2727	39.2882	16.6569	92.023	1029.76	38.4299	4.2727
TBP12-5-80	89.2476	1655.82	1.62131	-9.87093	318.815	-0.0904307	319.908	0.006474	26.4195	0.0825848	41.5996	10.955	-96.2421	-334.553	NA	NA	41.5996	10.955
TBP12-5-101	86.3164	1869.59	0.622823	10.2194	119.14	0.16849	119.551	0.0124882	9.9035	0.0828391	80.0055	7.87439	158.107	176.803	1583.58	37.2615	80.0055	7.87439
TBP12-5-6	376.23	7634.33	1.20396	20.8355	9.68396	0.0985194	10.6593	0.0148876	4.45437	0.417886	95.2641	4.21221	95.4088	9.70702	99.0138	229.562	95.2641	4.21221
TBP12-5-65	305.816	10018.9	3.38888	20.3578	18.7538	0.102498	18.9659	0.0151337	2.82829	0.149125	96.8272	2.71809	99.0793	17.9054	153.615	442.573	96.8272	2.71809
TBP12-5-23	334.83	28441.4	0.887594	20.9916	12.8188	0.10255	13.184	0.0156129	3.08157	0.233736	99.8693	3.05383	99.1278	12.452	81.3074	305.331	99.8693	3.05383
TBP12-5-47	55.9145	2601.87	1.32475	228.287	153.092	0.00945893	154.285	0.0156611	19.1521	0.124135	100.175	19.0375	9.55929	14.6804	NA	NA	100.175	19.0375
TBP12-5-68	164.723	13532.6	1.05074	29.9377	43.0125	0.0724105	43.485	0.0157224	6.39342	0.147026	100.565	6.37963	70.9843	29.8219	-840.42	1279.65	100.565	6.37963
TBP12-5-49	475.853	28174.1	0.926589	20.7409	5.9466	0.107748	6.10598	0.0162082	1.38595	0.226983	103.647	1.42502	103.903	6.03055	109.766	140.516	103.647	1.42502
TBP12-5-50	568.217	66902.2	1.60783	20.9835	9.80594	0.115318	9.89347	0.01755	1.31313	0.132726	112.153	1.45997	110.819	10.3871	82.2222	233.204	112.153	1.45997
TBP12-5-72	184.015	4727.63	2.01662	24.8615	24.7235	0.107621	24.8518	0.0194054	2.52189	0.101477	123.897	3.0947	103.786	24.5232	-336.611	644.669	123.897	3.0947
TBP12-5-84	110.766	13507.6	1.23588	27.0659	38.3721	0.128896	38.5738	0.0253024	3.93882	0.102111	161.08	6.26606	123.106	44.7497	-560.388	1067.09	161.08	6.26606
TBP12-5-94	107.214	4512.45	0.772477	51.7734	90.5147	0.0678496	90.6599	0.0254773	5.12946	0.0565792	162.18	8.21518	66.6568	58.5549	NA	NA	162.18	8.21518
TBP12-5-4	399.991	45559	0.997643	20.4292	11.1227	0.177273	11.2283	0.0262659	1.53635	0.136828	167.136	2.53479	165.712	17.1693	145.397	261.57	167.136	2.53479
TBP12-5-48	358.055	24566	0.773186	20.5414	8.7067	0.179967	8.9108	0.0268116	1.89623	0.212801	170.562	3.19183	168.032	13.8006	132.531	205.024	170.562	3.19183
TBP12-5-31	211.066	14868.7	1.14977	21.7423	20.7973	0.180835	21.1702	0.0285159	3.95569	0.186852	181.253	7.06997	168.779	32.9306	-2.71467	506.216	181.253	7.06997
TBP12-5-29	180.12	17607.9	0.99735	18.5138	14.431	0.213187	14.6712	0.0286256	2.64403	0.180219	181.94	4.74332	196.223	26.1833	371.602	326.44	181.94	4.74332
TBP12-5-74	187.028	27660.2	1.10272	20.3007	9.19468	0.232943	9.49802	0.0342973	2.38121	0.250706	217.388	5.09015	212.626	18.2229	160.181	215.456	217.388	5.09015
TBP12-5-98	646.764	56903.2	1.97052	19.9073	3.67809	0.242907	3.8574	0.0350713	1.16243	0.301351	222.21	2.53903	220.798	7.65481	205.776	85.3593	222.21	2.53903
TBP12-5-52	63.9223	6621.44	0.847583	23.677	33.7983	0.206528	34.2412	0.0354654	5.48923	0.160311	224.664	12.1199	190.635	59.5824	-212.477	870.083	224.664	12.1199
TBP12-5-41	398.231	72762.7	2.00601	19.4278	4.32948	0.256744	4.51804	0.0361762	1.29164	0.285886	229.087	2.90703	232.039	9.37229	262.071	99.4554	229.087	2.90703
TBP12-5-77	284.288	44155.8	2.99659	19.5103	4.73051	0.292929	5.3887	0.0414501	2.58077	0.478922	261.815	6.62147	260.862	12.3972	252.333	108.868	261.815	6.62147
TBP12-5-55	152.396	13060.1	1.91282	22.9203	16.7589	0.254991	16.9533	0.0423881	2.56007	0.151007	267.618	6.71095	230.622	34.9897	-131.534	416.736	267.618	6.71095
TBP12-5-99	295.941	28778.8	2.19397	17.8394	2.34902	0.506199	2.58874	0.0654939	1.08798	0.420272	408.951	4.31109	415.89	8.83422	454.592	52.1414	408.951	4.31109
TBP12-5-73	134.259	20592.6	0.594671	17.3634	7.52376	0.535437	7.7494	0.0674283	1.85639	0.239553	420.643	7.55947	435.412	27.4461	514.311	165.507	420.643	7.55947
TBP12-5-92	147.243	28605	0.707385	17.7229	5.78706	0.532172	6.33781	0.0684047	2.58413	0.407733	426.537	10.6655	433.25	22.3555	469.117	128.223	426.537	10.6655
TBP12-5-40	96.7608	73939.2	1.83289	13.4791	2.99719	1.80073	3.08656	0.17604	0.73738	0.2389	1045.3	7.11538	1045.72	20.153	1046.62	60.4525	1046.62	60.4525
TBP12-5-67	379.581	16988.2	3.90269	13.3037	1.11915	1.88966	1.30566	0.182328	0.672487	0.515056	1079.68	6.68526	1077.46	8.66976	1072.99	22.4794	1072.99	22.4794
TBP12-5-100	94.3906	69555.7	2.38038	13.2349	2.78558	1.98025	3.16799	0.190081	1.50887	0.476287	1121.82	15.5358	1108.81	21.3769	1083.36	55.8834	1083.36	55.8834
TBP12-5-64	221.673	96537.9	0.845688	13.1286	0.996221	1.98077	1.46783	0.188604	1.078	0.734414	1113.81	11.0268	1108.98	9.90435	1099.52	19.9387	1099.52	19.9387
TBP12-5-32	40.3871	22181.1	1.97573	12.9286	6.47706	2.11559	6.71829	0.198373	1.78413	0.265562	1166.58	19.0387	1153.9	46.3534	1130.17	129.127	1130.17	129.127
TBP12-5-2	37.4672	20691.9	1.30899	12.7316	6.29354	2.21721	6.33207	0.204734	0.697468	0.110149	1200.7	7.64084	1186.49	44.3383	1160.66	124.9	1160.66	124.9
TBP12-5-79	37.2571	13425.2	1.46576	12.6891	4.28781	2.12627	5.44425	0.195681	3.35478	0.616207	1152.08	35.3933	1157.38	37.6148	1167.29	84.9682	1167.29	84.9682
TBP12-5-20	249.821	114511	2.46983	12.632	1.07758	2.17508	1.27578	0.199272	0.68297	0.535334	1171.41	7.31559	1173.11	8.8744	1176.26	21.3357	1176.26	21.3357
TBP12-5-17	95.4398	72212.1	2.68653	12.6089	2.92776	2.20387	3.03284	0.20154	0.791394	0.260942	1183.59	8.55725	1182.27	21.1862	1179.88	57.9071	1179.88	57.9071
TBP12-5-37	44.9448	27743.6	1.69715	12.5316	5.87247	2.19973	6.08728	0.199929	1.60286	0.263313	1174.94	17.2161	1180.96	42.5171	1192	115.998	1192	115.998
TBP12-5-3	147.688	66702.1	3.36863	12.5295	1.76851	2.24188	2.14749	0.203726	1.21823	0.567279	1195.31	13.2912	1194.25	15.0802	1192.34	34.9044	1192.34	34.9044
TBP12-5-97	235.352	75221.5	2.41269	12.2289	1.13712	2.42087	1.56328	0.214713	1.07276	0.686222	1253.88	12.2237	1248.81	11.2336	1240.11	22.2918	1240.11	22.2918
TBP12-5-89	38.0608	4713.02	1.0031	12.0661	7.85745	2.14246	8.3298	0.187491	2.76514	0.331958	1107.77	28.1442	1162.62	57.7265	1266.29	153.643	1266.29	153.643
TBP12-5-51	65.6592	46428.8	1.70331	11.2794	1.92374	3.04766	2.55762	0.249316	1.68542	0.658981	1434.95	21.6824	1419.65	19.5561	1396.75	36.8882	1396.75	36.8882
TBP12-5-45	223.256	114874	2.42457	11.1045	0.857434	3.14836	1.15157	0.253561	0.768708	0.667533	1456.81	10.0234	1444.6	8.87438	1426.65	16.3731	1426.65	16.3731
TBP12-5-13	41.7468	26168	2.10436	10.884	3.41332	3.2843	3.68026	0.259255	1.37607	0.373906	1486.03	18.2631	1477.34	28.6541	1464.86	64.8595	1464.86	64.8595
TBP12-5-43	210.927	17236.3	2.87923	10.259	0.94781	2.9815	2.8969	0.22184	2.73746	0.944962	1291.59	32.0402	1402.91	22.0303	1576.35	17.7401	1576.35	17.7401
TBP12-5-105	67.0002	43661.3	1.41538	9.83662	1.87611	4.15054	2.78523	0.296108	2.05858	0.739105	1671.98	30.3178	1664.32	22.7938	1654.65	34.7634	1654.65	34.7634
TBP12-5-15	271.665	162579	1.58226	9.81519	0.485547	3.92145	1.67923	0.279154	1.6075	0.957284	1587.1	22.6148	1618.12	13.5869	1658.69	8.9907	1658.69	8.9907
TBP12-5-1	811.591	7623.12	2.28021	9.74209	0.372752	3.56876	1.1733	0.252155	1.11251	0.948193	1449.58	14.4422	1542.61	9.30612	1672.52	6.89127	1672.52	6.89127
TBP12-5-66	62.2149	62565	1.16415	9.71504	2.29947	4.33836	2.49497	0.305681	0.968139	0.388037	1719.42	14.6113	1700.68	20.5907	1677.66	42.4858	1677.66	42.4858
TBP12-5-9	218.152	78570.1	2.42659	9.68273	0.641206	4.34053	1.11437	0.304817	0.911409	0.817872	1715.15	13.7253	1701.1	9.19661	1683.81	11.8374	1683.81	11.8374
TBP12-5-69	237.964	164640	1.33559	9.68041	0.702397	4.12249	1.08203	0.289436	0.823055	0.760661	1638.71	11.9097	1658.77	8.84213	1684.25	12.9663	1684.25	12.9663
TBP12-5-88	88.6854	63276.9	1.85899	9.6701	1.52115	4.2722	2.08714	0.299627	1.42907	0.684706	1689.46	21.2391	1688.02	17.1744	1686.22	28.0714	1686.22	28.0714
TBP12-5-93	129.6	81170	1.48383	9.66856	1.39961	4.50789	1.92662	0.316107	1.324	0.687214	1770.69	20.4999	1732.43	16.0122	1686.51	25.827	1686.51	25.827
TBP12-5-104	112.676	50001.7	1.14854	9.66285	0.891672	4.42213	2.06253	0.30991	1.85983	0.901721	1740.26	28.3654	1716.49	17.0818	1687.6	16.4517	1687.6	16.4517
TBP12-5-78	173.409	115003	1.91787	9.64633	0.551168	4.36674	1.99213	0.305505	1.91436	0.960964	1718.55	28.8792	1706.07	16.4601	1690.76	10.1662	1690.76	10.1662
TBP12-5-22	101.478	64781.7	1.04134	9.64252	1.1408	4.24436	1.53925	0.296826	1.03337	0.671351	1675.55	15.2474	1682.65	12.6497	1691.49	21.0386	1691.49	21.0386
TBP12-5-14	204.969	202767	2.10034	9.63986	0.650343	4.42291	1.14631	0.309227	0.943968	0.823486	1736.9	14.3727	1716.64	9.49335	1692	11.9918	1692	11.9918
TBP12-5-70	72.2688	37439.2	2.15497	9.6391	1.74717	4.18831	2.1403	0.292802	1.23624	0.577603	1655.52	18.0495	1671.73	17.5453	1692.14	32.2193	1692.14	32.2193
TBP12-5-71	67.6207	51161.3	2.00854	9.59028	1.50889	4.37752	1.76091	0.304479	0.907769	0.515512	1713.48	13.6589	1708.1	14.556	1701.5	27.7931	1701.5	27.7931
TBP12-5-58	38.2484	86330.8	0.815098	9.56145	3.51651	4.56166	3.77726	0.316333	1.37908	0.365102	1771.8	21.3644	1742.29	31.4677	1707.04	64.7427	1707.04	64.7427
TBP12-5-82	47.5074	19478.5	1.1413	9.50611	2.72419	4.16444	3.05522	0.287117	1.38317	0.452725	1627.11	19.8901	1667.05	25.0204	1717.72	50.0821	1717.72	50.0821
TBP12-5-12	32.9983	33398.1	1.43849	9.28724	2.66379	4.6433	3.13776	0.312761	1.65823	0.528477	1754.28	25.4679	1757.09	26.2204	1760.42	48.7106	1760.42	48.7106
TBP12-5-83	157.833	107258	1.79608	9.23699	0.902917	4.54485	1.54993	0.304473	1.25977	0.812792	1713.45	18.955	1739.22	12.9001	1770.33	16.4874	1770.33	16.4874
TBP12-5-44	82.9008	54494.4	1.20336	9.16682	1.44044	4.79674	1.65498	0.318906	0.814922	0.492405	1784.39	12.7023	1784.33	13.9063	1784.24	26.2593	1784.24	26.2593
TBP12-5-61	119.574	198548	1.69946	5.77088	0.422894	10.9271	1.16396	0.457348	1.08442	0.931663	2427.84	21.9382	2516.95	10.8282	2589.6	7.05705	2589.6	7.05705
TBP12-5-90	66.3425	55593.7	0.946776	5.49576	0.880824	12.9522	1.26114	0.516263	0.902564	0.715673	2683.31	19.8104	2676.18	11.8881	2670.79	14.5855	2670.79	14.5855
Little Snake River, Tbp 12-6. U-Pb geochronologic analyses.
							Isotope ratios						Apparent ages (Ma)
Analysis	U	206Pb	U/Th	206Pb*	±	207Pb*	±	206Pb*	±	error	206Pb*	±	207Pb*	±	206Pb*	±	Best age	±
	(ppm)	204Pb		207Pb*	(%)	235U*	(%)	238U	(%)	corr.	238U*	(Ma)	235U	(Ma)	207Pb*	(Ma)	(Ma)	(Ma)
TBP12-6-96	232.535	2019.08	1.23967	18.7093	185.277	0.027608	185.776	0.00374619	13.61	0.07326	24.1044	3.27448	27.6527	50.721	347.899	1466.58	24.1044	3.27448
TBP12-6-103	465.967	5157.31	1.91902	18.9935	35.3077	0.0274165	35.779	0.00377673	5.78817	0.161776	24.3005	1.4039	27.4634	9.69475	313.733	826.749	24.3005	1.4039
TBP12-6-3	159.19	2490.27	0.752396	9.30016	108.774	0.0579573	111.298	0.00390928	23.5676	0.211752	25.1517	5.91611	57.2066	61.9863	1757.88	131.703	25.1517	5.91611
TBP12-6-75	223.608	2103.64	2.6289	24.5637	89.835	0.022145	90.5228	0.0039452	11.1382	0.123043	25.3823	2.82157	22.2403	19.9162	-305.679	3125.68	25.3823	2.82157
TBP12-6-41	583.539	11843.1	1.164	29.5183	33.8138	0.0187406	34.3603	0.00401212	6.10417	0.177652	25.8121	1.57246	18.8528	6.41819	-800.219	981.868	25.8121	1.57246
TBP12-6-104	233.78	2483.95	1.3161	37.1995	86.943	0.0153059	87.9529	0.00412949	13.2899	0.151102	26.5656	3.52326	15.4237	13.4638	NA	NA	26.5656	3.52326
TBP12-6-7	178.22	1807.73	0.94023	7.14472	119.524	0.0813423	121.113	0.00421503	19.5529	0.161443	27.1147	5.29057	79.4062	92.7639	2226.74	366.812	27.1147	5.29057
TBP12-6-32	432.556	5306.78	0.909278	21.0569	40.3932	0.0282042	40.9356	0.00430732	6.64209	0.162257	27.7071	1.83638	28.2416	11.4021	73.9612	996.686	27.7071	1.83638
TBP12-6-19	1094.97	1944.75	0.531178	20.206	17.7844	0.0303451	18.2012	0.00444701	3.87307	0.212792	28.6037	1.10539	30.3536	5.44302	171.095	418.024	28.6037	1.10539
TBP12-6-92	489.792	5813.48	1.04463	23.861	42.4321	0.030559	42.5644	0.00528843	3.35256	0.0787645	34.0016	1.13692	30.5645	12.8164	-231.956	1113.6	34.0016	1.13692
TBP12-6-42	99.8935	1664	1.13922	7.27076	141.238	0.105005	141.937	0.00553717	14.0681	0.0991151	35.5964	4.99394	101.386	137.792	2196.41	246.03	35.5964	4.99394
TBP12-6-85	138.615	1216.91	1.38611	3.34585	594.946	0.230718	595.177	0.0055987	16.5691	0.027839	35.9909	5.94676	210.791	#NUM!	3464.4	83.5843	35.9909	5.94676
TBP12-6-39	580.91	5789.21	1.44628	22.2166	22.3314	0.0356405	22.465	0.00574276	2.44719	0.108933	36.9143	0.900783	35.5588	7.85019	-55.0209	549.77	36.9143	0.900783
TBP12-6-47	127.32	1218.04	1.61768	10.6267	61.0725	0.0772629	62.2016	0.00595481	11.7978	0.189671	38.2733	4.50205	75.5683	45.3283	1510.16	1292.9	38.2733	4.50205
TBP12-6-64	156.064	3835.28	1.39662	14.8419	61.4605	0.0595424	62.4597	0.00640936	11.1272	0.178151	41.1855	4.56821	58.7268	35.6546	849.462	1423.59	41.1855	4.56821
TBP12-6-59	99.0949	1472.78	1.71452	10.5284	76.1808	0.0899945	78.5602	0.0068719	19.1886	0.244253	44.1476	8.44237	87.4982	65.953	1527.68	1768.54	44.1476	8.44237
TBP12-6-57	282.035	4863.68	1.08104	27.4845	42.1624	0.0371593	43.4088	0.00740718	10.3273	0.237908	47.5738	4.89499	37.0467	15.793	-601.941	1190.92	47.5738	4.89499
TBP12-6-12	442.433	4476.39	1.34098	19.7476	13.9115	0.0523773	14.6373	0.00750164	4.55209	0.310992	48.1782	2.18494	51.837	7.39727	224.428	322.956	48.1782	2.18494
TBP12-6-53	829.422	14941	2.36231	20.582	5.08488	0.0523598	5.34528	0.00781598	1.64801	0.308312	50.1892	0.823912	51.8202	2.70044	127.935	119.746	50.1892	0.823912
TBP12-6-105	207.76	5434.77	1.87283	25.7884	24.1646	0.0562057	24.4955	0.0105124	4.01232	0.163799	67.4138	2.69077	55.5242	13.2365	-431.768	641.97	67.4138	2.69077
TBP12-6-9	141.609	4568.77	1.67811	16.7485	22.4205	0.0951418	23.6104	0.011557	7.40095	0.313461	74.0742	5.45082	92.2819	20.8303	592.947	491.66	74.0742	5.45082
TBP12-6-15	155.818	4667.38	1.22625	23.4372	35.2531	0.0709688	35.7757	0.0120635	6.09221	0.170289	77.3008	4.68121	69.6184	24.0763	-186.973	905.119	77.3008	4.68121
TBP12-6-21	368.412	9538.74	1.58354	20.2249	13.5413	0.0827066	13.7717	0.0121318	2.50867	0.182161	77.736	1.93843	80.6864	10.6823	168.918	317.488	77.736	1.93843
TBP12-6-63	135.818	5177.6	1.08676	25.1326	75.2134	0.0681545	75.4105	0.0124231	5.44778	0.0722418	79.5913	4.30931	66.9466	48.8942	-364.616	2287.35	79.5913	4.30931
TBP12-6-68	145.439	11466.2	1.32196	37.1863	69.8178	0.0477613	70.0979	0.0128813	6.26017	0.089306	82.5077	5.1322	47.3735	32.4562	NA	NA	82.5077	5.1322
TBP12-6-2	124.454	4561.09	0.738969	3.23619	1459.75	0.607966	1459.76	0.0142696	5.44843	0.00373242	91.3377	4.94138	482.277	#NUM!	3515.96	1338.7	91.3377	4.94138
TBP12-6-16	368.689	6793.33	1.81612	21.4405	15.3545	0.0922224	15.5806	0.0143407	2.64489	0.169755	91.7894	2.41053	89.5715	13.3587	30.8444	369.775	91.7894	2.41053
TBP12-6-29	168.683	6556.36	1.57084	29.4898	39.5945	0.0718945	39.86	0.0153768	4.59265	0.115219	98.371	4.48354	70.4956	27.1528	-797.478	1159.76	98.371	4.48354
TBP12-6-48	53.3246	7414.67	1.2731	17.9263	45.1435	0.190422	45.4713	0.0247575	5.45034	0.119863	157.653	8.48842	176.989	73.9861	443.759	1055.19	157.653	8.48842
TBP12-6-74	348.54	26647.2	1.81483	19.908	10.7438	0.172047	10.8972	0.0248413	1.82228	0.167224	158.18	2.84741	161.194	16.2437	205.676	249.858	158.18	2.84741
TBP12-6-62	347.586	14213	1.17086	20.2364	5.09195	0.173935	5.62235	0.0255281	2.38388	0.424001	162.499	3.82537	162.828	8.45863	167.588	119.004	162.499	3.82537
TBP12-6-22	200.962	8981.11	1.0001	20.4445	10.4297	0.175051	11.0128	0.025956	3.53583	0.321067	165.189	5.7666	163.793	16.6599	143.64	245.272	165.189	5.7666
TBP12-6-46	212.325	14474.1	1.43019	21.7983	9.38436	0.164837	9.76319	0.0260602	2.69324	0.275857	165.843	4.40959	154.928	14.0294	-8.92359	226.985	165.843	4.40959
TBP12-6-67	104.086	6539.55	1.06101	18.2241	16.153	0.209584	17.6252	0.0277015	7.05172	0.400093	176.146	12.2532	193.204	31.0185	407.008	363.59	176.146	12.2532
TBP12-6-94	117.397	12822.7	1.00176	19.7936	5.77449	0.193802	6.22569	0.0278216	2.32692	0.37376	176.9	4.06034	179.868	10.2626	219.047	133.716	176.9	4.06034
TBP12-6-79	337.338	123848	1.72293	20.4767	7.0346	0.188425	7.10458	0.0279831	0.994701	0.140008	177.913	1.7455	175.284	11.4381	139.964	165.347	177.913	1.7455
TBP12-6-37	91.5426	14109.4	0.998136	20.1738	20.2771	0.191294	20.7141	0.0279891	4.23228	0.204319	177.951	7.42838	177.733	33.7861	174.816	477.296	177.951	7.42838
TBP12-6-23	405.749	24737.1	0.822223	19.939	4.93519	0.194	5.16233	0.0280547	1.51444	0.293363	178.362	2.66415	180.037	8.51694	202.107	114.602	178.362	2.66415
TBP12-6-13	380.01	18015	0.94639	21.5859	8.07712	0.179278	8.37178	0.0280671	2.20158	0.262976	178.439	3.87461	167.439	12.9236	14.6224	194.419	178.439	3.87461
TBP12-6-72	127.352	7879.37	1.02217	20.0476	23.7136	0.199125	24.0958	0.0289526	4.27467	0.177403	183.99	7.75379	184.386	40.6505	189.44	558.597	183.99	7.75379
TBP12-6-86	312.657	29816.6	0.821162	19.2007	5.70314	0.224313	5.83945	0.031237	1.25434	0.214804	198.285	2.4493	205.493	10.8638	288.968	130.417	198.285	2.4493
TBP12-6-20	181.901	40763.3	2.15828	18.1578	5.72961	0.526236	5.86127	0.0693015	1.23533	0.210762	431.946	5.16113	429.309	20.5229	415.155	128.134	431.946	5.16113
TBP12-6-8	113.692	22103.5	0.700669	17.1645	7.66879	0.71222	7.72852	0.0886634	0.958999	0.124086	547.627	5.03486	546.063	32.6535	539.521	167.961	547.627	5.03486
TBP12-6-51	45.1571	17471.3	1.21059	13.5261	5.76246	1.83549	5.82957	0.180062	0.882055	0.151307	1067.31	8.67625	1058.25	38.3351	1039.58	116.413	1039.58	116.413
TBP12-6-87	80.4857	56601.9	2.17948	13.3948	3.14964	1.81888	3.66544	0.176701	1.87488	0.511503	1048.93	18.1496	1052.28	24.0195	1059.27	63.4165	1059.27	63.4165
TBP12-6-54	123.415	39842.4	1.39464	13.3684	1.70956	1.79205	2.04737	0.173751	1.12655	0.550243	1032.75	10.7503	1042.57	13.3437	1063.24	34.4004	1063.24	34.4004
TBP12-6-58	142.663	73725.1	1.24263	13.1762	2.04903	1.93564	2.27199	0.184976	0.981542	0.432019	1094.1	9.87719	1093.49	15.2121	1092.26	41.0233	1092.26	41.0233
TBP12-6-84	41.17	7668.55	0.796932	13.0395	6.53891	1.95971	6.72521	0.185332	1.57194	0.233739	1096.04	15.844	1101.78	45.2445	1113.13	130.701	1113.13	130.701
TBP12-6-4	89.806	92169.3	1.66417	12.9321	2.32012	1.94523	2.68081	0.182448	1.34306	0.500988	1080.33	13.3588	1096.8	17.9802	1129.62	46.2361	1129.62	46.2361
TBP12-6-71	77.4814	14645.9	2.12865	12.8398	3.38414	2.18581	6.01604	0.203549	4.97396	0.826784	1194.36	54.2295	1176.53	41.9353	1143.89	67.2998	1143.89	67.2998
TBP12-6-43	37.9895	19090.6	1.73943	12.7875	5.32859	2.18167	5.68718	0.202336	1.98749	0.349469	1187.86	21.5612	1175.21	39.6169	1151.98	105.854	1151.98	105.854
TBP12-6-91	36.9921	15547	6.02025	12.3183	6.7243	1.98496	7.59813	0.177338	3.53771	0.465602	1052.42	34.3515	1110.41	51.3476	1225.78	132.212	1225.78	132.212
TBP12-6-95	272.357	166574	1.66504	11.7196	0.604275	2.6646	1.29782	0.226487	1.14856	0.88499	1316.06	13.6726	1318.7	9.58211	1322.96	11.7051	1322.96	11.7051
TBP12-6-78	75.6664	77239.7	1.08416	11.3958	1.73339	2.90516	3.51473	0.240111	3.05756	0.869928	1387.28	38.1637	1383.25	26.5553	1377.04	33.3272	1377.04	33.3272
TBP12-6-52	57.3977	29305.5	1.07267	11.3132	1.65886	2.82099	2.36509	0.231466	1.68578	0.712776	1342.18	20.4261	1361.13	17.7316	1391	31.8335	1391	31.8335
TBP12-6-97	42.0434	30216.5	1.25629	11.2815	3.42482	2.94664	3.61749	0.241097	1.16484	0.322002	1392.4	14.5871	1393.98	27.431	1396.4	65.6876	1396.4	65.6876
TBP12-6-17	151.058	5345.34	1.34685	11.2613	1.15747	2.58608	3.27053	0.211217	3.05887	0.93528	1235.3	34.3866	1296.7	23.9525	1399.83	22.1834	1399.83	22.1834
TBP12-6-44	136.727	52107.3	0.992823	11.2595	1.86964	2.97548	2.0366	0.242982	0.807579	0.396532	1402.18	10.1768	1401.38	15.4788	1400.13	35.8344	1400.13	35.8344
TBP12-6-102	96.6807	78448.2	0.872913	11.2103	1.99009	2.96254	2.44512	0.240869	1.42061	0.581	1391.21	17.7767	1398.07	18.5639	1408.51	38.0984	1408.51	38.0984
TBP12-6-70	72.0349	36569.4	1.19091	11.2053	1.72257	3.09483	1.90863	0.251512	0.821952	0.430651	1446.27	10.6485	1431.41	14.6481	1409.38	32.9723	1409.38	32.9723
TBP12-6-30	98.7002	84387.7	1.3902	11.1966	1.79299	2.97845	2.09559	0.241867	1.08475	0.517635	1396.4	13.6191	1402.13	15.9312	1410.85	34.3134	1410.85	34.3134
TBP12-6-11	1266.42	295404	2.5966	11.1001	0.161776	3.08592	1.08557	0.248433	1.07344	0.988833	1430.39	13.7703	1429.2	8.32513	1427.41	3.08882	1427.41	3.08882
TBP12-6-35	199.581	73706.5	0.803887	11.0496	0.603813	3.13341	1.21131	0.25111	1.05008	0.866901	1444.2	13.5866	1440.93	9.32405	1436.1	11.5153	1436.1	11.5153
TBP12-6-98	205.264	158930	1.90959	11.0421	0.383361	3.00022	0.92799	0.240272	0.845103	0.910681	1388.11	10.5539	1407.68	7.06723	1437.4	7.30971	1437.4	7.30971
TBP12-6-24	124.499	56251.9	1.80342	11.0349	1.42067	3.06568	1.73273	0.245355	0.991982	0.572497	1414.48	12.5987	1424.16	13.2672	1438.64	27.0853	1438.64	27.0853
TBP12-6-99	45.0475	36673.4	0.620178	10.959	4.30335	3.11611	4.52214	0.247676	1.38959	0.307286	1426.48	17.7823	1436.68	34.7752	1451.79	81.9298	1451.79	81.9298
TBP12-6-36	79.177	61344.3	1.4408	10.8742	1.38313	3.16673	1.69466	0.249751	0.979193	0.577811	1437.19	12.6145	1449.09	13.0783	1466.56	26.2705	1466.56	26.2705
TBP12-6-81	161.027	93041.2	1.50433	10.6134	0.674246	3.46543	0.978136	0.266754	0.70862	0.72446	1524.31	9.61947	1519.38	7.70782	1512.52	12.7258	1512.52	12.7258
TBP12-6-90	80.2987	46768	1.36309	10.0281	1.77302	3.80104	4.20017	0.276452	3.8076	0.906535	1573.47	53.1611	1592.97	33.7772	1618.85	33.0059	1618.85	33.0059
TBP12-6-66	68.8448	69658.2	1.06079	9.82207	0.819084	4.18873	1.0974	0.29839	0.730334	0.665513	1683.32	10.8198	1671.82	8.99555	1657.39	15.1706	1657.39	15.1706
TBP12-6-56	131.132	71732	0.783166	9.7726	1.03823	4.26916	1.26359	0.302587	0.72022	0.569981	1704.13	10.7852	1687.44	10.3956	1666.74	19.2073	1666.74	19.2073
TBP12-6-82	240.146	44570.5	1.02541	9.70898	0.539866	3.73524	2.76236	0.263021	2.70909	0.980716	1505.28	36.3686	1578.95	22.1286	1678.81	9.97284	1678.81	9.97284
TBP12-6-33	48.8893	11084.9	0.797881	9.69892	2.54591	4.37421	4.04612	0.307696	3.14474	0.777224	1729.36	47.7008	1707.48	33.4511	1680.72	47.0226	1680.72	47.0226
TBP12-6-50	302.242	13414.9	1.60596	9.65809	0.284469	4.20602	2.05552	0.294619	2.03574	0.990377	1664.57	29.865	1675.19	16.8639	1688.51	5.24842	1688.51	5.24842
TBP12-6-88	179.371	122161	1.05524	9.64691	0.462477	4.33432	1.24804	0.303255	1.15919	0.928807	1707.43	17.3881	1699.92	10.2971	1690.65	8.53037	1690.65	8.53037
TBP12-6-10	130.083	130712	1.31983	9.61261	0.650575	4.2618	0.830414	0.297121	0.516082	0.621475	1677.01	7.6206	1686.02	6.82952	1697.21	11.9882	1697.21	11.9882
TBP12-6-38	91.2522	23841.2	2.63222	9.60918	1.12088	4.31513	1.69768	0.300732	1.27504	0.751052	1694.94	19.0036	1696.26	13.9956	1697.87	20.6545	1697.87	20.6545
TBP12-6-49	135.205	74874.8	1.95343	9.59309	1.0795	4.28181	1.42431	0.297909	0.929155	0.652355	1680.93	13.7482	1689.87	11.7246	1700.96	19.8842	1700.96	19.8842
TBP12-6-28	113.727	35703	1.31849	9.43769	1.03244	4.39124	1.43734	0.300574	1.00001	0.695735	1694.16	14.8983	1710.69	11.8879	1730.98	18.9454	1730.98	18.9454
TBP12-6-5	223.669	240158	3.59777	9.43043	0.506302	4.34876	1.24387	0.297437	1.13616	0.913411	1678.59	16.7907	1702.66	10.2691	1732.4	9.28975	1732.4	9.28975
TBP12-6-6	587.754	57142.9	2.04629	9.39929	0.220494	4.42359	3.57024	0.301557	3.56343	0.998091	1699.02	53.2233	1716.77	29.5759	1738.46	4.0408	1738.46	4.0408
TBP12-6-40	81.7873	79343.9	1.68269	9.38873	1.35944	4.49874	2.00797	0.306335	1.47779	0.735961	1722.64	22.3395	1730.74	16.6822	1740.52	24.9174	1740.52	24.9174
TBP12-6-60	29.9112	26126.6	1.81722	9.35558	3.6498	4.35963	3.9735	0.295814	1.57086	0.395334	1670.52	23.1171	1704.72	32.8298	1747	66.8627	1747	66.8627
TBP12-6-25	94.7801	58708.7	1.3306	9.30293	1.24948	4.56553	1.77573	0.308042	1.26175	0.710551	1731.06	19.1549	1743	14.7918	1757.33	22.8519	1757.33	22.8519
TBP12-6-14	73.7745	50172	1.58353	9.26674	1.35998	4.49718	1.66004	0.30225	0.951941	0.573443	1702.45	14.243	1730.45	13.7904	1764.46	24.8513	1764.46	24.8513
TBP12-6-61	163.505	115581	2.32121	9.14089	0.723138	4.90242	1.24421	0.325011	1.01249	0.81376	1814.15	16.0099	1802.67	10.4935	1789.4	13.1731	1789.4	13.1731
TBP12-6-55	163.274	132898	1.86055	8.9417	0.734378	5.14723	1.21999	0.333804	0.974203	0.798532	1856.79	15.7169	1843.94	10.3728	1829.44	13.3124	1829.44	13.3124
TBP12-6-83	37.8275	32290.2	1.14996	8.85057	2.22448	5.16167	2.347	0.33133	0.748386	0.31887	1844.82	12.0066	1846.32	19.966	1847.99	40.2397	1847.99	40.2397
TBP12-6-69	288.51	201518	1.22685	8.47644	0.356515	5.67971	0.844505	0.349171	0.765562	0.906522	1930.64	12.7724	1928.29	7.29135	1925.75	6.38717	1925.75	6.38717
TBP12-6-76	82.2638	128303	1.07865	5.7048	0.995837	11.9178	3.09649	0.4931	2.93199	0.946875	2584.07	62.4223	2597.96	29.0152	2608.8	16.5849	2608.8	16.5849
TBP12-6-26	64.5253	74502.9	1.59289	5.10647	0.500152	14.5925	2.17743	0.540441	2.11921	0.973262	2785.29	47.9296	2789.04	20.6942	2791.74	8.1899	2791.74	8.1899
